# Supplementary material for: Targeting an anchored phosphatase-deacetylase unit restores renal ciliary homeostasis
Source: eLife. 2021 Jul 12;10:e67828. doi: 10.7554/eLife.67828 (PMC8291974; doi:10.7554/eLife.67828)
Supplement: Figure 1—source data 1. [file elife-67828-fig1-data1.xlsx]

## Sheet: Sheet1
		Figure 1I- Percent ciliated collecting ducts in kidney sections
			WT	AKAP220-/-
			60	60
			20	57.14
			0	30.76
			0	72.72
			16.66	62.5
			47.82	88.88
			20	71.42
			33.33	77.77
			42.85	92.85
			0	58.33
			20	66.66
			0	25
			0	40
			23.8	50
			20	66.66
			0	33.33
			30.76	60
			42.85	50
			0	50
			0	80
			0	50
			50	25
			0	33.33
			0	87.5
			0	28.5
			0	0
			33.33	80
			0	100
			20	37.5
			0	42.85
			16.66	66.66
			14.28	16.66
			0	66.66
			25	66.66
			50	30
			25	62.5
			0	71.42
			16.66	100
			16.66	100
			0	33.33
