# Supplementary material for: Targeting an anchored phosphatase-deacetylase unit restores renal ciliary homeostasis
Source: eLife. 2021 Jul 12;10:e67828. doi: 10.7554/eLife.67828 (PMC8291974; doi:10.7554/eLife.67828)
Supplement: Figure 1—source data 2. [file elife-67828-fig1-data2.xlsx]

## Sheet: Sheet1
	Figure 1J: Length of primary cilia in kidney sections
		Wildtype	AKAP220-/-
		1.973	1.356
		0.792	1.448
		2.631	1.248
		0.987	1.356
		0.832	1.677
		0.942	1.448
		1.029	1.387
		1.213	0.882
		1.149	1.584
		0.776	1.5
		1.519	1.584
		1.118	2.24
		1.334	1.819
		1.144	2.048
		1.091	1.715
		0.727	2.394
		1.306	1.186
		0.767	2.376
		1.118	1.624
		0.767	2.371
		1.084	2.106
		0.857	1.456
		1.091	2.043
		1.356	1.456
		0.5	1.978
		0.738	1.471
		0.738	1.514
		0.942	1.471
		1.12	1.912
		1.777	1.591
		0.735	1.789
		0.735	1.917
		0.895	1.715
		0.942	2.325
		0.895	1.721
		1.149	2.08
		0.606	1.315
		1.324	1.591
		0.658	1.456
		0.294	1.332
		1.618	1.795
		0.987	1.795
		0.53	1.664
		0.942	1.315
		0.735	1.644
		0.588	1.591
		1.029	2.121
		1.186	2.106
		1.395	1.618
		1.332	1.912
		1.471	2.048
		0.294	1.04
		0.658	1.715
		0.735	1.912
		1.06	2.225
		0.294	2.394
		0.416	1.777
		0.658	1.917
		0.75	2.206
		0.857	1.715
		1.248	2.572
		0.857	1.029
		1.256	2.798
		0.832	2.225
		0.93	1.478
		0.658	1.387
		1.029	1.071
		1.12	0.987
		0.588	2.663
		1.029	2.394
		0.735	1.973
		1.213	1.315
		1.324	1.265
		1.186	2.24
		0.588	1.677
		1.478	2.24
		1.644	2
		1.071	1.315
		1.315	2
		1.324	1.795
		1.12	2.206
		0.857	1.777
		0.93	1.934
		0.942	1.618
		1.795	2.651
			1.721
			1.715
			1.765
			1.962
			1.478
			1.324
			1.478
			0.75
			1.176
			1.471
			1.677
			1.186
			1.356
			1.332
			1.563
			1.819
			1.356
			0.857
			1.912
			1.04
			1.356
			1.265
			1.677
			2.206
			1.12
			1.149
			2
			2.206
			1.664
			1.765
			2
			2.245
			1.795
			2.106
			2.302
			2.425
			1.471
			1.256
			1.591
			2.704
			2.897
			1.387
			1.471
			2.186
			1.819
			2.297
			1.514
			1.618
			2.325
			1.962
			1.86
			1.395
			0.832
			1.332
			1.644
			1.324
			1.883
			0.987
			1.356
			1.332
			1.04
			1.535
			1.912
			1.213
			1.5
			1.771
			1.478
			1.624
			2.206
			1.514
			1.356
			1.149
			0.792
			1.448
			0.93
			0.53
			2.53
			1.456
			1.677
			1.973
			1.843
			2.539
			1.912
			1.471
			2.394
			1.456
			1.149
			1.149
			2.106
			1.883
			1.149
			2.186
			2
			2.465
			2.121
			1.917
			2.24
			1.584
			1.644
			1.917
			1.478
			0.882
			2.504
			1.843
			2.186
			2.684
			1.563
			2.513
			1.917
			1.721
			2.602
			2.24
			1.771
			2.763
			2
			2.618
			2.08
			2.53
			2.206
			1.618
			4.285
			3.333
			3.264
			4.886
			2.875
			3.264
			3.388
			3.03
			3.333
			3.534
			2.985
			2.985
			0.923
			1.382
			1.2
			1.455
			1.311
			1.5
			1.974
			1.819
			1.372
			1.372
			0.978
			1.118
			0.978
			1.036
			1.974
			1.715
			1.456
			1.471
			1.248
			0.942
			0.441
			0.942
			1.514
			1.332
			1.715
			1.819
			1.934
			1.771
			0.942
			1.149
			1.356
			1.324
			0.987
			1.06
			1.324
			1.872
			1.265
			2.186
			1.186
			0.686
			0.653
			1.581
			0.874
			0.618
			1.372
			1.311
			1.553
			1.851
			1.091
			1.576
			1.289
			1.2
			1.311
			1.356
			1.382
			0.978
			2.265
			1.46
			1.736
			1.48
			1.149
			1.795
			1.677
			0.942
			1.213
			2.206
			1.06
			2.121
			1.618
			1.715
			1.618
			0.735
			1.789
			1.213
			1.395
			1.917
			1.765
			1.677
			2.121
			1.535
			1.563
			1.912
			1.535
			1.176
			1.872
			1.795
			1.677
			2.206
			1.256
			1.12
			1.478
			1.514
			1.563
			1.149
			1.535
			1.471
			1.677
			1.677
			2.206
			1.186
			1.715
			1.448
			1.176
			1.471
			0.792
			1.213
			1.843
			1.912
			1.448
			1.912
			2.106
			2
			1.248
			1.514
			2
