# Supplementary material for: Targeting an anchored phosphatase-deacetylase unit restores renal ciliary homeostasis
Source: eLife. 2021 Jul 12;10:e67828. doi: 10.7554/eLife.67828 (PMC8291974; doi:10.7554/eLife.67828)
Supplement: Figure 1—source data 3. [file elife-67828-fig1-data3.xlsx]

## Sheet: Sheet1
		Figure
					Figure 1U- Rescue of GFP-tagged AKAP220 in AKAP220KO IMCD3 cells
		Number of cells	Number of cilia	Untransfected	Number of cells	Number of cilia	GFP Control	Number of cells	Number of cilia	AKAP220 rescue
		161	140	86.95	19	16	84.21	35	8	22.85
		955	908	95.07	60	52	86.66	50	9	18
		660	587	88.93	15	12	86.66	85	8	9.41
		1776			94			170
