# Supplementary material for: Targeting an anchored phosphatase-deacetylase unit restores renal ciliary homeostasis
Source: eLife. 2021 Jul 12;10:e67828. doi: 10.7554/eLife.67828 (PMC8291974; doi:10.7554/eLife.67828)
Supplement: Figure 1—source data 4. [file elife-67828-fig1-data4.xlsx]

## Sheet: Sheet1
		Figure 1Y- Percent ciliated cells measured in wildtype and AKAP220KO spheroids
		WT cells	WTcilia	WT%	220KO cells	220KO cilia	AKAP220KO %
		27	15	55.5556	30	29	96.6667
		14	5	35.7143	17	16	94.1176
		14	6	42.8571	15	13	86.6667
		25	11	44	10	9	90
		28	15	53.5714	27	25	92.5926
		7	3	42.8571	7	7	100
		11	1	9.09091	10	8	80
		15	5	33.3333	13	10	76.9231
		15	5	33.3333	6	5	83.3333
		9	1	11.1111	10	10	100
		14	5	35.7143	9	6	66.6667
					11	10	90.9091
		28	5	17.8571	17	16	94.1176
		14	4	28.5714	9	9	100
		12	2	16.6667	29	28	96.5517
		6	1	16.6667
		12	2	16.6667	17	16	94.1176
		12	5	41.6667	24	24	100
		19	5	26.3158	18	15	83.3333
		14	5	35.7143	21	19	90.4762
		7	1	14.2857	27	25	92.5926
		14	6	42.8571
		8	1	12.5	7	7	100
		4	1	25	14	10	71.4286
		8	0	0	20	18	90
		11	3	27.2727	16	12	75
		5	1	20	9	7	77.7778
		7	0	0	9	9	100
		6	0	0	10	7	70
		11	4	36.3636	9	9	100
		8	1	12.5	9	6	66.6667
		8	4	50	6	6	100
					16	16	100
					12	10	83.3333
					8	6	75
					10	10	100
					6	6	100
					17	14	82.3529
					13	9	69.2308
					9	6	66.6667
					13	13	100
					11	9	81.8182
					8	7	87.5
					11	10	90.9091
					9	9	100
					9	8	88.8889
					13	12	92.3077
					8	7	87.5
					7	7	100
					13	11	84.6154
					7	6	85.7143
					12	10	83.3333
					7	7	100
					16	16	100
