# Supplementary material for: Targeting an anchored phosphatase-deacetylase unit restores renal ciliary homeostasis
Source: eLife. 2021 Jul 12;10:e67828. doi: 10.7554/eLife.67828 (PMC8291974; doi:10.7554/eLife.67828)
Supplement: Figure 2—source data 1. [file elife-67828-fig2-data1.xlsx]

## Sheet: Sheet1
					Figure 2D- acetyl tubulin western blot quantification
			GAPDH				acetyl tub				actual intensity
		WT	1	21468.4		1	3917.69		0.182487		2.31641
		KO	2	21670.7		2	9160.52		0.422714
		WT	1	4070.5		1	3903.26		0.958914		1.39588
		KO	2	6155.69		2	8239.55		1.33853
		WT	1	6476.72		1	3659.67		0.56505		1.67696
		KO	2	7465.67		2	7074.2		0.947565
		WT	1	5876.96		4	3908.4		0.665037		2.3724
		KO	3	5255.84		3	8292.33		1.57774
