# Supplementary material for: Targeting an anchored phosphatase-deacetylase unit restores renal ciliary homeostasis
Source: eLife. 2021 Jul 12;10:e67828. doi: 10.7554/eLife.67828 (PMC8291974; doi:10.7554/eLife.67828)
Supplement: Figure 2—source data 2. [file elife-67828-fig2-data2.xlsx]

## Sheet: Sheet1
			Figure 2J- Western blot quantification for HDAC6
		WT	GAPDH	WT	AKAP220KO	GAPDH	AKAP220KO
		1	1	1	0.304	0.506	0.600791
		1	1	1	0.58	1.087	0.533579
		1	1	1	0.507	1.063	0.476952
		1	1	1	0.359	0.922	0.389371
		1	1	1	0.064	0.757	0.0845443
				1			0.417047
