# Supplementary material for: Targeting an anchored phosphatase-deacetylase unit restores renal ciliary homeostasis
Source: eLife. 2021 Jul 12;10:e67828. doi: 10.7554/eLife.67828 (PMC8291974; doi:10.7554/eLife.67828)
Supplement: Figure 2—source data 3. [file elife-67828-fig2-data3.xlsx]

## Sheet: Sheet1
			Wildtype							AKAP220KO
	Replicates	1	2	3	average			Replicates	1	2	3	average
hrs of CHX							hrs of CHX
0		1	1	1	1		0		1	1	1	1
2		0.850769	0.815505	0.796015	0.820763		2		0.816917	0.348345	0.743	0.636087
4		0.695813	0.751667	0.561815	0.669765		4		0.52022	0.153334	0.431648	0.368401
