# Supplementary material for: Targeting an anchored phosphatase-deacetylase unit restores renal ciliary homeostasis
Source: eLife. 2021 Jul 12;10:e67828. doi: 10.7554/eLife.67828 (PMC8291974; doi:10.7554/eLife.67828)
Supplement: Figure 2—source data 4. [file elife-67828-fig2-data4.xlsx]

## Sheet: Sheet1
Figure 2V			flag-HDAC6										HDAC6-DC
	AKAP220-/- (transfected)	AKAP220-/-	percent cilia loss		Percent ciliated cells		number of ciliated cells			AKAP220-/- (transfected)	AKAP220-/- ciliated	percent cilia loss		Percent ciliated cells		number of ciliated cells
	2	2	100		0		0		1		1			100
	1	1	100		0		0		1		1			100
	1	1	100		0		0		4		3			75
	1	1	100		0		0		4		2			50
	4	4	100		0		0		4		4			100
	1	1	100		0		0		3		2			66.6667
	1	1	100		0		0		5		5			100
	2	2	100		0		0		2		2			100
	8	7	87.5		12.5		1		2		2			100
	5	5	100		0		0		3		2			66.6667
	6	6	100		0		0		11		9			81.8182
	9	9	100		0		0		7		5			71.4286
	10	8	80		20		2		11		9			81.8182
	7	6	85.7143		14.2857		1		9		7			77.7778
	6	4	66.6667		33.3333		2		3		2			66.6667
	4	2	50		50		2		7		5			71.4286
	4	4	100		0		0		5		4			80
	5	4	80		20		1		5		5			100
	6	3	50		50		3		6		5			83.3333
	7	5	71.4286		28.5714		2		6		6			100
	5	4	80		20		1
	8	6	75		25		2		99		81			81.8182
	103	86			16.5049		17
	5	5	100		0		0		2		2			100
	10	9	90		10		1		3		1			33.3333
	6	4	66.6667		33.3333		2		2		2			100
	9	9	100		0		0		1		1			100
	5	4	80		20		1		2		2			100
	6	4	66.6667		33.3333		2		2		2			100
	6	5	83.3333		16.6667		1		1		0			0
	4	3	75		25		1		1		1			100
	6	5	83.3333		16.6667		1		2		2			100
	2	1	50		50		1		2		2			100
	1	1	100		0		0		1		1			100
	2	2	100		0		0		1		1			100
	3	3	100		0		0		2		2			100
	4	4	100		0		0		1		1			100
	2	2	100		0		0		2		1			50
	71	61			14.0845		10		4		2			50
									2		2			100
	cells	cilia							1		1			100
	2	0							1		1			100
	1	0							2		2			100
	4	1							2		2			100
	6	1							1		1			100
	6	2							2		2			100
	5	0							40		34			85
	6	0
	13	2							cells	cilia
	3	0							2	2
	6	1							2	2
	8	0							3	2
	8	2							2	1
	7	1							7	6
	8	1							6	5
	7	1							11	11
	11	1							3	2
	11	2							7	6
	4	0							3	1
	8	0							5	4
	6	1							8	6
	10	2							9	9
	10	2							5	4
	7	2							9	7
	5	0							6	6
									3	2
	162	22	13.5802						10	9
									8	5
	2	0							8	8
	2	1							6	6
	2	1							6	4
	4	0							4	4
	1	0							6	5
	1	0							6	5
	4	0
	4	0							145	122	84.1379
	5	1
	6	1							4	3
	6	0							3	3
	2	0							4	3
	2	1							4	4
	8	2							5	5
	4	1							6	6
	6	0							6	6
	3	0							2	1
	9	1							5	4
	4	3							5	3
	8	0							8	4
	8	2							6	5
	8	1							7	6
	5	0							6	4
	8	3							13	11
	10	4							13	9
	5	0							8	8
	10	3							9	7
	3	1							10	8
	13	1							18	18
	8	2							9	7
									6	6
	161	29	18.0124						6	5
									8	6
									6	5
									4	4
									5	5
									6	6
									7	6
									4	4
									203	172	84.7291
