# Supplementary material for: Targeting an anchored phosphatase-deacetylase unit restores renal ciliary homeostasis
Source: eLife. 2021 Jul 12;10:e67828. doi: 10.7554/eLife.67828 (PMC8291974; doi:10.7554/eLife.67828)
Supplement: Figure 2—source data 5. [file elife-67828-fig2-data5.xlsx]

## Sheet: Sheet1
Figure 2 O and supplemental figure 2I
image6	wt pla			wt PLA control cells (untransfected)					wt v5 only				hdac6only
	particles	cells		particles	cells			image6	particles	cells			particles	cells
	222	7		17	4				11	8		Image5	81	10
	293	7		56	9				8	5			79	8
	65	2							1	5
									2	8		image4	29	5
image5	88	4		94	8								40	3
	190	3		81	6			image4	8	10
	193	5		84	6				3	8		image3	51	8
	138	5		48	4							image2	18	2
								image3	9	11			23	2
image3	226	4		115	7
	235	6		62	5							image1	70	9
	194	2
sums	1844	45		557	49				42	55			391	47
puncta/cell		40.9778			11.3673					0.763636				8.31915
91920
image1	755	28		20	3			image1	0	14		image1	71	23
				15	2				10	11		image2	27	6
image2	460	17		22	8			image2	6	13		image3	89	22
	277	3		57	8				2	14
				50	12
sums		48			21					52				51
puncta/cell		31.0833			4.9697					0.346154				3.66667
91920b
image1	204	6		35	5			image1	4	30		image1	21	5
	164	6						image3	9	14		image2	31	8
image2	453	9		102	10							image3	66	18
	770	19											17	4
sums		40			15					44				35
puncta/cell		39.775			9.13333					0.295455				3.85714
cells counted		133			85					151				133
