# Supplementary material for: Targeting an anchored phosphatase-deacetylase unit restores renal ciliary homeostasis
Source: eLife. 2021 Jul 12;10:e67828. doi: 10.7554/eLife.67828 (PMC8291974; doi:10.7554/eLife.67828)
Supplement: Figure 3—source data 1. [file elife-67828-fig3-data1.xlsx]

## Sheet: Sheet1
			Figures 3X, 3Y and supplemental figure 3K
	Wildtype IMCD3			AKAP220KO IMCD3			AKAP220-DPP1 IMCD3
	DMSO	Tubacin		DMSO	Tubacin		DMSO	Tubacin
	16.6667	25		100	71.42		50	57.14
	16.6667	62.5		90	66.67		66.67	57.14
	10.3448	50		80	58.14		50	50
	25	19.0476		97.5	81.81		66.67	100
	25	34.0909		81.81	66		75	100
	2.5	13.0435		100	66.67		75	100
	15.7895	45.4545		83.33	84.6		87.5	83.33
	0	50		62.5	85.7		95.2	97.4
	14.2857	43.4783		77.77	97.5		75	72.72
	20	4.7619		85.7	86.88		100	60
	10.3448	5.5556		85	92		71.4	93.1
	0	46.6667		90	95.7		76.9	80
	0	18.1818		93.1033	88.88		64.5233	64.76
	6.6667	11.7647		74.5333	76.9		63.89	83.3333
	14.5594	16.6667		85.35	68.75		85.9	93.5767
	17.5	45.4545			78.57		80.825	76.455
	12.5188	47.5			68.2825
	4.25288	45.8333			70.8075
		31.8273			86.5925
		32.0723			90.865
		20.5422
