# Supplementary material for: Targeting an anchored phosphatase-deacetylase unit restores renal ciliary homeostasis
Source: eLife. 2021 Jul 12;10:e67828. doi: 10.7554/eLife.67828 (PMC8291974; doi:10.7554/eLife.67828)
Supplement: Figure 4—source data 1. [file elife-67828-fig4-data1.xlsx]

## Sheet: Sheet1
			Figure 4Q inset: FRAP ( lifeact GFP)
	Time (sec)	AKAP220KO (N=163)
	0	99.8654	100	99.7315	99.7468	100	99.8739	91.9419	100	100	100	100	100	100	100	80.803	94.7683	99.8594	99.5	100	99.6193	100	100	100	100	99.8639	99.7143	99.7561	100	96.619	99.8752	99.7717	99.6399	99.8721	99.8705	100	90.7357	100	100	100	100	100	99.8731	99.863	100	99.7097	100	100	99.7361
	0.2	100	100	99.8658	99.8734	100	99.8739	91.6777	99.8628	100	99.5192	99.8679	99.887	99.8828	99.8736	80.6775	94.3199	100	99.75	100	99.8731	99.7351	100	99.8454	100	100	100	100	100	96.619	100	100	99.88	99.7442	99.7409	100	90.7357	99.8667	99.8798	100	99.8752	99.5406	99.7462	99.863	99.8752	100	100	100	99.8681
	0.4	99.8654	100	100	99.8734	100	100	91.5456	99.8628	99.872	99.6795	100	100	99.7655	99.8736	80.6775	94.6188	99.7187	99.625	100	99.8731	99.6026	100	99.6909	100	99.7279	99.7143	99.6341	100	96.619	99.6255	99.7717	100	99.8721	99.8705	100	90.7357	99.8667	99.8798	99.6283	100	99.3874	100	99.863	100	99.8549	100	99.8672	99.8681
	0.6	99.8654	100	100	100	100	99.8739	91.5456	99.7257	100	99.5192	100	99.774	99.7655	99.8736	80.5521	94.7683	99.8594	100	100	100	99.6026	100	99.8454	100	99.8639	99.8571	99.6341	100	96.619	99.3758	99.8858	99.88	100	100	100	90.7357	99.7333	99.7596	99.8761	99.6255	99.2343	99.8731	100	100	99.8549	100	100	100
	0.8	0	0	0	0	0	0	0	0	0	0	0	0	0	0	0	0	0	0	0	0	0	0	0	0	0	0	0	0	0	0	0	0	0	0	0	0	0	0	0	0	0	0	0	0	0	0	0	0
	1	10.2288	8.23212	10.0671	5.82278	13.5402	13.2409	18.4941	19.6159	12.548	25.641	11.4927	6.10169	7.85463	9.86094	26.2233	19.133	9.84529	6.875	12.091	6.9797	10.0662	12.3037	21.0201	14.1566	13.3333	12.5714	6.58537	12.3506	13.394	10.4869	4.56621	9.96399	10.8696	15.9326	19.209	18.3924	12.6667	6.85096	11.4002	11.985	13.7825	10.0254	14.6575	8.86392	11.3208	12.0907	14.2098	14.7757
	1.2	17.0929	14.17	15.7047	10	21.1566	21.942	29.0621	31.5501	20.4866	37.9808	19.0225	9.9435	12.544	17.4463	42.66	30.4933	17.1589	10.5	18.7767	11.5482	15.3642	20.0262	32.4575	20.9337	21.4966	21.2857	11.8293	19.5219	22.6268	18.4769	8.10502	16.3265	18.1586	25.2591	29.661	28.8828	21.6	10.0962	19.3309	19.975	22.2052	16.8782	24.5205	15.231	18.7228	20.9068	24.0372	24.2744
	1.4	21.9381	18.6235	21.3423	13.038	27.7856	29.256	39.3659	41.4266	27.7849	48.2372	24.1744	12.8814	16.1782	23.641	54.3287	39.0135	22.7848	14.625	23.6131	16.3706	21.3245	26.9634	41.8856	27.1084	27.483	28.7143	16.8293	26.9588	30.2991	24.3446	10.3881	22.569	24.8082	32.772	37.7119	36.921	28.1333	14.0625	24.6592	26.9663	28.4839	22.9695	32.6027	20.3496	25.9797	26.7003	32.4037	31.5303
	1.6	26.3795	22.6721	26.0403	16.3291	32.0169	34.3001	45.5746	50.3429	32.5224	55.2885	29.3263	15.3672	19.578	27.9393	63.99	46.0389	27.5668	17.875	28.0228	19.1624	26.6225	32.199	48.9954	33.7349	33.4694	35.1429	21.3415	32.9349	36.9311	29.3383	13.3562	27.9712	29.6675	40.9326	44.0678	43.5967	34.5333	16.9471	31.1029	32.2097	33.3844	26.9036	38.7671	25.0936	32.3657	32.4937	38.6454	38.7863
	1.8	30.148	26.0459	30.3356	19.2405	38.0818	38.966	52.1797	55.8299	36.7478	60.2564	32.2325	17.9661	22.626	33.1226	69.0088	53.3632	30.9423	20.25	32.1479	22.8426	30.4636	37.9581	54.7141	36.2952	38.9116	40.5714	25	36.7862	42.2627	35.9551	16.0959	33.8535	35.0384	46.114	49.1525	48.5014	39.7333	20.0721	36.1834	38.7016	38.1317	31.8528	44.5205	29.8377	37.5907	38.9169	43.6919	43.1398
	2	34.3203	30.0945	34.2282	21.1392	40.7616	43.5057	58.2563	59.2593	42.8937	63.3013	36.0634	20.226	25.5569	37.5474	73.1493	58.7444	34.8805	23.75	36.4154	25.8883	35.7616	42.801	58.5781	41.1145	42.3129	46.1429	28.9024	41.1687	46.2939	41.3233	18.6073	39.3758	39.3862	51.1658	55.3672	53.8147	44.4	22.7163	40.7683	41.9476	42.2665	34.7716	48.4932	34.8315	42.6705	44.0806	48.34	48.5488
	2.2	38.2234	32.5236	36.7785	23.7975	45.4161	46.2799	63.9366	62.8258	46.2228	68.4295	39.2338	22.5989	27.5498	40.9608	76.4115	61.8834	38.256	26.375	39.2603	28.4264	39.0728	46.466	62.442	41.4157	46.3946	51.4286	32.0732	45.5511	49.6749	44.5693	21.1187	40.9364	42.1995	55.829	58.0508	57.9019	48	24.8798	45.7249	47.5655	44.7167	37.9442	54.9315	37.8277	47.1698	46.8514	52.4568	53.1662
	2.4	40.3769	35.2227	39.3289	26.4557	49.0832	48.9281	65.3897	68.9986	49.8079	70.9936	41.6116	24.2938	29.66	44.2478	78.5445	65.0224	41.0689	27.75	42.9587	30.7107	41.7219	50.3927	66.4606	47.1386	49.2517	54.1429	35.3659	48.6056	52.2757	48.1898	23.2877	43.2173	45.7801	59.0674	61.4407	61.4441	51.0667	27.1635	48.4511	50.5618	47.3201	40.8629	59.1781	40.3246	51.2337	49.8741	55.9097	55.277
	2.6	42.6649	38.5965	42.6846	28.8608	50.7757	52.5851	70.1453	70.3704	52.2407	73.7179	43.3289	26.5537	32.5909	48.2933	80.0502	68.3109	43.3193	30.25	44.9502	33.3756	44.5033	53.0105	70.3246	49.3976	53.6054	56.8571	37.6829	51.7928	55.9168	49.0637	25.5708	47.1789	48.0818	64.1192	64.9718	64.1689	54.5333	29.8077	52.6642	53.6829	52.2205	44.1624	61.0959	42.8215	51.6691	52.267	59.3625	57.9156
	2.8	46.2988	40.2159	44.9664	31.8987	54.1608	54.4767	73.1836	72.7023	54.4174	75.9615	45.5746	28.0226	34.4666	51.7067	81.1794	72.3468	47.1167	33.25	48.6486	35.1523	47.8146	54.3194	71.8702	52.259	54.966	59.1429	42.3171	54.0505	58.2575	52.9338	27.0548	50.1801	50.8951	66.3212	67.9379	66.8937	57.0667	32.4519	55.7621	58.8015	56.3553	46.8274	63.2877	45.4432	58.7808	54.6599	61.4874	59.2348
	3	47.5101	41.8354	47.1141	33.038	55.5712	55.1072	76.6182	73.1139	57.4904	76.9231	48.4808	29.8305	35.7562	53.4766	82.0577	73.2436	49.3671	35	50.6401	38.3249	50.1987	58.9005	74.8068	54.3675	58.3673	62.7143	44.3902	56.0425	61.5085	56.804	28.7671	54.2617	53.1969	67.6166	70.904	70.2997	59.8667	35.5769	56.5056	60.5493	57.8867	47.335	66.1644	48.0649	60.6676	57.4307	64.409	63.3245
			Figure 4Q: FRAP (Lifeact GFP)
	Time (sec)	220KO (N=163)
	0	99.8654	100	99.7315	99.7468	100	99.8739	91.9419	100	100	100	100	100	100	100	80.803	94.7683	99.8594	99.5	100	99.6193	100	100	100	100	99.8639	99.7143	99.7561	100	96.619	99.8752	99.7717	99.6399	99.8721	99.8705	100	90.7357	100	100	100	100	100	99.8731	99.863	100	99.7097	100	100	99.7361
	0.2	100	100	99.8658	99.8734	100	99.8739	91.6777	99.8628	100	99.5192	99.8679	99.887	99.8828	99.8736	80.6775	94.3199	100	99.75	100	99.8731	99.7351	100	99.8454	100	100	100	100	100	96.619	100	100	99.88	99.7442	99.7409	100	90.7357	99.8667	99.8798	100	99.8752	99.5406	99.7462	99.863	99.8752	100	100	100	99.8681
	0.4	99.8654	100	100	99.8734	100	100	91.5456	99.8628	99.872	99.6795	100	100	99.7655	99.8736	80.6775	94.6188	99.7187	99.625	100	99.8731	99.6026	100	99.6909	100	99.7279	99.7143	99.6341	100	96.619	99.6255	99.7717	100	99.8721	99.8705	100	90.7357	99.8667	99.8798	99.6283	100	99.3874	100	99.863	100	99.8549	100	99.8672	99.8681
	0.6	99.8654	100	100	100	100	99.8739	91.5456	99.7257	100	99.5192	100	99.774	99.7655	99.8736	80.5521	94.7683	99.8594	100	100	100	99.6026	100	99.8454	100	99.8639	99.8571	99.6341	100	96.619	99.3758	99.8858	99.88	100	100	100	90.7357	99.7333	99.7596	99.8761	99.6255	99.2343	99.8731	100	100	99.8549	100	100	100
	0.8	0	0	0	0	0	0	0	0	0	0	0	0	0	0	0	0	0	0	0	0	0	0	0	0	0	0	0	0	0	0	0	0	0	0	0	0	0	0	0	0	0	0	0	0	0	0	0	0
	1	10.2288	8.23212	10.0671	5.82278	13.5402	13.2409	18.4941	19.6159	12.548	25.641	11.4927	6.10169	7.85463	9.86094	26.2233	19.133	9.84529	6.875	12.091	6.9797	10.0662	12.3037	21.0201	14.1566	13.3333	12.5714	6.58537	12.3506	13.394	10.4869	4.56621	9.96399	10.8696	15.9326	19.209	18.3924	12.6667	6.85096	11.4002	11.985	13.7825	10.0254	14.6575	8.86392	11.3208	12.0907	14.2098	14.7757
	1.2	17.0929	14.17	15.7047	10	21.1566	21.942	29.0621	31.5501	20.4866	37.9808	19.0225	9.9435	12.544	17.4463	42.66	30.4933	17.1589	10.5	18.7767	11.5482	15.3642	20.0262	32.4575	20.9337	21.4966	21.2857	11.8293	19.5219	22.6268	18.4769	8.10502	16.3265	18.1586	25.2591	29.661	28.8828	21.6	10.0962	19.3309	19.975	22.2052	16.8782	24.5205	15.231	18.7228	20.9068	24.0372	24.2744
	1.4	21.9381	18.6235	21.3423	13.038	27.7856	29.256	39.3659	41.4266	27.7849	48.2372	24.1744	12.8814	16.1782	23.641	54.3287	39.0135	22.7848	14.625	23.6131	16.3706	21.3245	26.9634	41.8856	27.1084	27.483	28.7143	16.8293	26.9588	30.2991	24.3446	10.3881	22.569	24.8082	32.772	37.7119	36.921	28.1333	14.0625	24.6592	26.9663	28.4839	22.9695	32.6027	20.3496	25.9797	26.7003	32.4037	31.5303
	1.6	26.3795	22.6721	26.0403	16.3291	32.0169	34.3001	45.5746	50.3429	32.5224	55.2885	29.3263	15.3672	19.578	27.9393	63.99	46.0389	27.5668	17.875	28.0228	19.1624	26.6225	32.199	48.9954	33.7349	33.4694	35.1429	21.3415	32.9349	36.9311	29.3383	13.3562	27.9712	29.6675	40.9326	44.0678	43.5967	34.5333	16.9471	31.1029	32.2097	33.3844	26.9036	38.7671	25.0936	32.3657	32.4937	38.6454	38.7863
	1.8	30.148	26.0459	30.3356	19.2405	38.0818	38.966	52.1797	55.8299	36.7478	60.2564	32.2325	17.9661	22.626	33.1226	69.0088	53.3632	30.9423	20.25	32.1479	22.8426	30.4636	37.9581	54.7141	36.2952	38.9116	40.5714	25	36.7862	42.2627	35.9551	16.0959	33.8535	35.0384	46.114	49.1525	48.5014	39.7333	20.0721	36.1834	38.7016	38.1317	31.8528	44.5205	29.8377	37.5907	38.9169	43.6919	43.1398
	2	34.3203	30.0945	34.2282	21.1392	40.7616	43.5057	58.2563	59.2593	42.8937	63.3013	36.0634	20.226	25.5569	37.5474	73.1493	58.7444	34.8805	23.75	36.4154	25.8883	35.7616	42.801	58.5781	41.1145	42.3129	46.1429	28.9024	41.1687	46.2939	41.3233	18.6073	39.3758	39.3862	51.1658	55.3672	53.8147	44.4	22.7163	40.7683	41.9476	42.2665	34.7716	48.4932	34.8315	42.6705	44.0806	48.34	48.5488
	2.2	38.2234	32.5236	36.7785	23.7975	45.4161	46.2799	63.9366	62.8258	46.2228	68.4295	39.2338	22.5989	27.5498	40.9608	76.4115	61.8834	38.256	26.375	39.2603	28.4264	39.0728	46.466	62.442	41.4157	46.3946	51.4286	32.0732	45.5511	49.6749	44.5693	21.1187	40.9364	42.1995	55.829	58.0508	57.9019	48	24.8798	45.7249	47.5655	44.7167	37.9442	54.9315	37.8277	47.1698	46.8514	52.4568	53.1662
	2.4	40.3769	35.2227	39.3289	26.4557	49.0832	48.9281	65.3897	68.9986	49.8079	70.9936	41.6116	24.2938	29.66	44.2478	78.5445	65.0224	41.0689	27.75	42.9587	30.7107	41.7219	50.3927	66.4606	47.1386	49.2517	54.1429	35.3659	48.6056	52.2757	48.1898	23.2877	43.2173	45.7801	59.0674	61.4407	61.4441	51.0667	27.1635	48.4511	50.5618	47.3201	40.8629	59.1781	40.3246	51.2337	49.8741	55.9097	55.277
	2.6	42.6649	38.5965	42.6846	28.8608	50.7757	52.5851	70.1453	70.3704	52.2407	73.7179	43.3289	26.5537	32.5909	48.2933	80.0502	68.3109	43.3193	30.25	44.9502	33.3756	44.5033	53.0105	70.3246	49.3976	53.6054	56.8571	37.6829	51.7928	55.9168	49.0637	25.5708	47.1789	48.0818	64.1192	64.9718	64.1689	54.5333	29.8077	52.6642	53.6829	52.2205	44.1624	61.0959	42.8215	51.6691	52.267	59.3625	57.9156
	2.8	46.2988	40.2159	44.9664	31.8987	54.1608	54.4767	73.1836	72.7023	54.4174	75.9615	45.5746	28.0226	34.4666	51.7067	81.1794	72.3468	47.1167	33.25	48.6486	35.1523	47.8146	54.3194	71.8702	52.259	54.966	59.1429	42.3171	54.0505	58.2575	52.9338	27.0548	50.1801	50.8951	66.3212	67.9379	66.8937	57.0667	32.4519	55.7621	58.8015	56.3553	46.8274	63.2877	45.4432	58.7808	54.6599	61.4874	59.2348
	3	47.5101	41.8354	47.1141	33.038	55.5712	55.1072	76.6182	73.1139	57.4904	76.9231	48.4808	29.8305	35.7562	53.4766	82.0577	73.2436	49.3671	35	50.6401	38.3249	50.1987	58.9005	74.8068	54.3675	58.3673	62.7143	44.3902	56.0425	61.5085	56.804	28.7671	54.2617	53.1969	67.6166	70.904	70.2997	59.8667	35.5769	56.5056	60.5493	57.8867	47.335	66.1644	48.0649	60.6676	57.4307	64.409	63.3245
	3.2	48.183	43.7247	48.9933	35.1899	59.5205	59.6469	77.675	76.8176	59.1549	79.3269	50.5945	31.0734	37.3974	57.0164	83.187	74.4395	52.0394	36.625	52.3471	39.467	51.3907	61.1257	75.2705	57.6807	60.5442	65	46.0976	58.8313	63.0689	59.176	30.2511	55.4622	55.243	70.9845	72.8814	72.3433	61.8667	36.4183	59.1078	61.7978	60.0306	50.2538	68.3562	50.9363	62.6996	61.461	67.0651	65.1715
	3.4	51.5478	45.749	51.2752	37.0886	61.354	60.0252	80.0528	78.8752	60.9475	78.8462	51.9155	33.2203	38.8042	59.4185	84.0652	77.13	53.0239	38.25	54.623	41.2437	53.7748	61.2565	78.9799	59.1867	62.3129	67.7143	49.878	61.089	66.71	59.176	32.5342	56.3025	56.7775	70.5959	74.5763	73.297	64	38.4615	60.347	65.0437	60.1838	51.7766	71.6438	52.3096	64.2961	62.0907	69.4555	68.3377
	3.6	52.2207	46.2888	52.2148	38.3544	62.6234	61.5385	81.7701	79.4239	63.2522	81.0897	53.1044	34.3503	41.3834	60.177	84.3162	77.8774	54.2897	40.875	57.6102	43.2741	54.5695	63.6126	80.8346	59.6386	64.6259	70	50.9756	63.2138	66.71	61.7978	33.4475	57.383	59.5908	73.1865	75.4237	74.9319	65.8667	40.3846	62.4535	67.166	62.9403	54.3147	72.0548	54.1823	68.0697	66.4987	71.4475	70.4485
	3.8	53.9704	48.0432	54.2282	41.0127	65.3032	63.5561	81.3738	82.0302	64.5327	83.6538	54.4254	35.7062	42.3212	61.5676	84.8181	80.2691	56.5401	41.375	58.8905	44.6701	57.8808	65.3141	82.5348	61.4458	65.8503	72.2857	52.0732	63.745	68.9207	64.1698	35.7306	57.623	59.9744	74.8705	76.2712	77.7929	67.3333	42.0673	64.684	68.6642	64.0123	57.1066	72.4658	56.0549	70.8273	68.136	72.6428	72.4274
	4	56.5276	50.3374	55.1678	41.1392	65.4443	64.3127	81.3738	79.561	66.5813	82.8526	55.4822	37.7401	43.0246	63.8432	85.8218	82.3617	57.5246	45.25	60.4552	46.5736	58.9404	67.2775	80.2164	62.5	67.0748	74.2857	53.6585	66.9323	69.8309	65.6679	36.8721	62.0648	61.509	73.9637	77.4011	79.1553	69.7333	43.5096	66.6667	67.7903	66.7688	58.1218	74.2466	58.427	70.1016	69.0176	74.2364	72.2955
	4.2	56.2584	51.9568	56.6443	42.9114	68.1241	66.4565	84.8085	84.225	68.3739	82.5321	56.1427	38.7571	43.4936	66.4981	85.1945	81.7638	60.0563	45.75	62.3044	49.4924	59.4702	68.8482	82.3802	64.6084	69.1156	76.2857	55	68.9243	71.5215	66.1673	37.7854	62.7851	63.9386	78.6269	79.096	81.4714	71.2	45.0721	68.5254	70.1623	68.4533	60.533	74.9315	61.4232	74.746	68.6398	74.2364	73.8786
	4.4	58.8156	53.1714	57.4497	45.443	69.3935	68.0958	87.0542	83.6763	69.2702	84.7756	58.6526	40.113	46.4244	68.1416	86.4492	82.6607	60.3376	45	62.0199	50	60.7947	68.9791	83.7713	66.4157	70.8844	75.7143	56.2195	69.3227	71.6515	67.5406	39.3836	62.6651	65.2174	80.1813	80.6497	81.6076	72	47.2356	68.4015	74.0325	68.6064	61.1675	76.3014	62.0474	75.9071	71.4106	76.7596	74.5383
	4.6	60.0269	53.3063	58.5235	46.2025	71.3681	68.4741	86.3937	82.0302	72.9834	86.0577	60.8983	41.4689	47.1278	70.5436	86.9511	83.4081	60.0563	48.5	64.1536	51.1421	61.9868	68.9791	86.3988	66.2651	70.068	78.7143	57.9268	71.0491	73.6021	68.5393	39.726	64.2257	66.7519	77.7202	82.0621	82.1526	73.4667	48.1971	69.6406	72.5343	69.0658	61.6751	76.5753	61.7978	75.762	73.0479	77.6892	74.8021
	4.8	62.0458	55.8704	60.2685	47.4684	71.086	67.9697	86.5258	84.0878	71.831	84.1346	60.8983	42.8249	47.245	71.3021	87.5784	85.3513	62.4473	48	66.0028	52.2843	63.3113	71.466	88.0989	71.5361	71.4286	78.7143	59.2683	71.5803	75.2926	69.4132	41.7808	67.7071	67.2634	78.6269	81.7797	84.1962	74.5333	49.6394	71.995	74.5318	70.291	62.9442	78.4932	63.7953	79.6807	73.4257	79.9469	74.8021
	5	62.0458	56.1404	61.0738	49.3671	74.048	70.4918	87.0542	86.0082	72.5992	85.2564	63.9366	43.7288	48.0657	71.4286	87.202	84.9028	63.1505	48.625	66.4296	54.3147	65.5629	71.8586	87.3261	70.6325	73.8776	79.7143	61.7073	71.5803	75.0325	71.9101	43.2648	68.4274	69.4373	79.1451	82.7684	85.5586	75.7333	50.4808	72.8625	76.779	70.5972	63.4518	79.589	66.5418	77.6488	76.1965	80.0797	79.6834
	5.2	63.3917	57.7598	60.9396	51.2658	74.6121	71.5006	88.111	84.7737	72.3431	86.5385	63.2761	44.8588	50.6448	72.8192	88.2058	89.0882	65.2602	52.75	67.2831	54.3147	65.5629	73.1675	85.626	69.7289	74.8299	81	63.4146	74.502	76.8531	72.5343	44.4064	67.8271	69.9488	80.9585	85.452	85.9673	76.2667	53.3654	74.4734	78.5268	72.8943	64.9746	78.7671	68.4145	80.8418	75.5668	80.3453	79.9472
	5.4	65.1413	58.0297	62.8188	51.2658	74.4711	71.6267	88.111	84.3621	74.7759	87.1795	66.1823	45.8757	50.5275	75.3477	88.7077	85.5007	64.8383	52.875	67.9943	55.3299	67.4172	75.1309	89.1808	72.2892	75.3741	82.8571	64.6341	75.4316	77.8934	73.5331	44.0639	70.5882	69.3095	82.772	84.7458	84.7411	77.4667	52.6442	74.7212	80.5243	74.732	66.8782	78.6301	68.789	80.2612	77.204	82.2045	77.4406
	5.6	65.8143	59.919	64.8322	52.5316	74.8942	72.2573	88.6394	85.1852	73.8796	88.3013	66.3144	46.7797	52.6377	76.6119	88.4567	85.9492	65.9634	55.625	68.7055	57.4873	69.1391	76.7016	88.8717	73.1928	76.1905	82.7143	66.0976	77.2908	76.9831	74.2821	45.6621	70.9484	71.0997	83.0311	85.5932	85.2861	77.6	54.0865	73.7299	78.7765	76.2634	67.7665	80.274	69.2884	85.3411	77.4559	81.1421	79.1557
	5.8	65.6797	60.5938	65.6376	52.9114	76.8688	73.5183	90.8851	86.2826	76.3124	87.6603	67.3712	48.2486	52.0516	77.244	89.2095	87.8924	68.3544	55.5	70.697	57.3604	69.5364	75.6545	87.9444	73.494	77.551	83.5714	68.2927	76.7596	80.104	78.0275	47.2603	72.389	73.0179	83.8083	86.2994	87.3297	79.2	55.2885	74.5973	78.2772	76.4165	69.0355	79.3151	69.0387	82.5835	77.33	81.9389	81.3984
	6	65.9489	61.8084	64.698	55.8228	77.8561	75.4098	89.432	86.0082	75.5442	88.9423	68.0317	48.8136	53.5756	80.2781	88.5822	88.3408	68.4951	57.5	70.4125	57.9949	71.3907	77.6178	89.9536	75.1506	78.2313	84.8571	70	76.8924	78.5436	77.4032	47.8311	74.5498	72.3785	81.9948	86.7232	86.2398	77.4667	56.25	76.9517	79.2759	79.4793	69.9239	80.9589	69.5381	83.7446	79.2191	82.7357	79.0237
	6.2	67.6985	61.5385	66.5772	55.5696	78.5614	77.4275	89.9604	88.8889	76.6965	87.9808	69.2206	49.9435	54.1618	80.6574	88.9586	88.0419	70.0422	57.25	72.5462	58.5025	74.3046	79.3194	87.7898	76.6566	78.5034	85.1429	68.9024	77.4236	79.0637	79.5256	48.7443	74.91	72.6343	82.3834	85.8757	87.3297	79.2	56.3702	77.3234	80.5243	78.1011	70.6853	80.137	71.0362	83.7446	77.204	84.1965	81.9261
	6.4	69.179	62.3482	67.5168	56.4557	77.433	75.7881	91.8098	88.3402	77.5928	88.9423	69.8811	50.1695	54.7479	80.1517	89.8369	89.8356	71.308	58.75	73.6842	59.1371	73.7748	80.1047	89.7991	74.8494	78.0952	86.1429	70.4878	77.822	80.3641	79.4007	50.5708	74.91	71.4834	83.0311	86.2994	86.1035	79.8667	58.0529	77.943	79.0262	79.3262	72.2081	81.6438	71.5356	83.7446	79.3451	84.1965	84.9604
	6.6	69.0444	62.888	67.5168	57.3418	79.2666	76.2926	92.4703	87.38	77.977	88.6218	69.6169	51.5254	55.6858	81.5424	89.5859	88.9387	71.4487	59.625	73.3997	59.3909	74.0397	79.3194	88.7172	76.8072	80.8163	87.4286	71.2195	78.6189	83.0949	80.8989	50.9132	76.2305	73.5294	85.1036	88.5593	87.3297	81.0667	59.375	77.1995	83.6454	80.3982	71.4467	82.1918	72.2846	83.4543	80.6045	85.3918	84.9604
	6.8	70.5249	64.6424	67.3826	58.7342	80.1128	76.0404	92.074	87.9287	78.6172	91.1859	68.8243	52.7684	56.272	81.2895	90.2133	89.5366	71.1674	59.75	73.542	61.5482	74.9669	79.712	91.3447	76.2048	80.6803	87.2857	71.0976	78.8845	82.7048	78.402	51.9406	76.8307	73.7852	84.5855	88.2768	90.0545	81.2	60.2163	78.6865	84.6442	80.3982	71.5736	84.3836	73.4082	84.9057	84.131	85.6574	84.9604
	7	71.0633	63.2928	69.396	60.1266	80.3949	77.5536	91.5456	88.0658	79.2574	91.0256	71.4663	52.8814	57.4443	81.9216	90.0878	90.1345	71.308	61.125	75.3912	62.3096	74.5695	79.5812	93.3539	77.5602	82.0408	86.5714	71.9512	79.5485	82.7048	79.2759	53.1963	76.7107	73.5294	86.1399	89.548	89.1008	81.8667	63.101	79.9257	84.1448	80.3982	70.4315	84.7945	73.1586	86.0668	82.1159	84.7278	84.5646
	7.2	72.6783	64.7773	69.396	60	80.677	78.1841	93.1308	88.0658	81.178	89.7436	71.07	55.2542	56.6237	83.3123	89.5859	89.9851	72.0113	60.125	76.8137	63.5787	75.0993	81.0209	92.4266	77.7108	82.585	85.8571	73.1707	78.6189	82.7048	78.7765	55.4795	77.6711	76.087	85.8808	88.2768	89.1008	82.6667	63.8221	80.0496	84.02	79.9387	73.3503	84.2466	75.7803	84.9057	84.7607	87.3838	85.2243
	7.4	73.2167	67.0715	71.1409	61.6456	80.8181	78.3102	93.1308	86.9684	81.178	91.8269	71.3342	54.5763	58.3822	86.8521	90.8407	92.2272	74.5429	62.875	77.3826	62.9442	75.7616	80.4974	91.6538	80.8735	82.0408	88.1429	75	80.7437	84.5254	78.9014	55.8219	76.5906	78.7724	87.1762	88.2768	88.6921	83.8667	62.9808	80.0496	84.2697	82.389	72.9695	84.2466	75.1561	87.0827	85.2645	86.9854	84.8285
	7.6	72.2746	66.3968	70.3356	62.7848	82.9337	78.3102	93.395	89.4376	82.5864	90.3846	73.5799	55.8192	58.4994	86.4728	90.8407	89.3871	74.4023	62	75.8179	62.4365	77.351	81.0209	91.4992	79.2169	82.8571	88	74.5122	80.6109	84.5254	80.1498	55.3653	79.5918	76.9821	87.4352	88.8418	90.1907	83.2	66.1058	80.917	82.0225	83.7672	74.3655	83.5616	75.2809	84.3251	79.597	87.915	86.0158
	7.8	73.3513	66.6667	71.8121	62.4051	81.3822	77.9319	93.395	90.2606	80.4097	90.7051	72.5231	56.0452	59.789	86.4728	91.3425	92.6756	75.2461	64.125	76.8137	63.4518	75.7616	83.5079	91.6538	81.4759	83.9456	87.7143	75.2439	82.6029	84.6554	80.1498	56.3927	81.3926	77.8772	87.6943	87.4294	90.327	84	65.625	80.2974	85.5181	84.3798	74.8731	83.9726	75.6554	86.6473	85.5164	87.5166	86.9393
	8	73.755	67.7463	71.5436	62.5316	83.921	80.7062	94.3197	88.4774	82.2023	91.0256	73.5799	56.9492	60.4924	85.7143	91.3425	89.8356	75.1055	63.375	77.8094	65.6091	78.9404	83.2461	92.4266	81.9277	84.6259	87.1429	75.2439	83.1341	86.2159	80.6492	59.589	79.1116	78.2609	85.7513	88.5593	91.8256	83.6	66.9471	79.6778	85.7678	81.7764	77.0305	84.3836	77.4032	84.7605	85.2645	88.8446	85.6201
	8.2	73.3513	67.2065	72.8859	65.5696	81.9464	77.9319	92.8666	88.4774	80.9219	89.4231	74.2404	57.9661	61.5475	86.3464	90.8407	91.0314	75.1055	63.875	78.8051	64.7208	80.2649	85.2094	91.9629	81.7771	85.1701	88.1429	75.8537	81.1421	85.1756	81.2734	59.2466	78.1513	78.0051	87.1762	89.2655	92.5068	83.6	66.1058	80.1735	86.7665	81.7764	78.2995	84.6575	77.0287	83.8897	86.7758	89.243	87.7309
	8.4	73.8896	68.2861	73.557	65.8228	84.4852	80.8323	95.3765	90.535	82.0743	89.9038	73.4478	58.1921	62.2509	85.5879	91.2171	91.9283	75.8087	65	78.5206	66.2437	79.3377	82.4607	89.3354	82.0783	84.4898	90.2857	75.3659	82.8685	85.0455	84.2697	59.8174	81.9928	79.5396	87.3057	90.3955	92.2343	86.4	67.7885	82.7757	86.2672	81.4701	77.5381	85.2055	77.1536	83.164	86.1461	89.243	87.9947
	8.6	73.8896	68.556	73.4228	65.443	85.0494	82.0933	96.037	90.3978	81.8182	90.3846	73.9762	59.096	61.8992	85.335	91.5935	93.423	75.5274	64.875	79.6586	65.9898	79.0728	81.4136	91.8083	83.8855	84.6259	90.5714	75	82.6029	87.7763	84.6442	60.6164	80.5522	78.9003	84.715	90.113	91.6894	84.1333	68.149	83.767	87.2659	82.6953	80.203	86.5753	77.5281	87.0827	86.398	90.3054	88.2586
	8.8	74.0242	68.4211	73.8255	66.5823	84.6262	81.3367	94.716	90.8093	83.7388	91.5064	74.1083	60	61.5475	87.3578	91.9699	90.4335	77.3558	65.875	79.9431	67.0051	78.543	84.2932	92.272	85.0904	84.898	91	76.4634	84.1965	88.9467	84.02	59.9315	82.1128	79.2839	86.9171	89.8305	93.188	84.8	68.75	84.3866	88.6392	83.9204	77.9188	86.5753	78.402	85.7765	87.4055	88.9774	86.9393
	9	75.5047	69.7706	73.9597	69.1139	86.4598	81.5889	95.2444	90.6722	82.5864	92.4679	76.354	60.791	63.7749	87.8635	92.2208	94.0209	77.6371	66.375	78.9474	68.0203	79.6026	85.0785	93.0448	83.8855	85.9864	89.8571	78.7805	84.8606	86.736	85.8926	60.6164	82.8331	80.5627	84.9741	89.4068	92.5068	86	69.4712	84.1388	86.1423	86.2175	80.3299	87.6712	78.5268	86.9376	86.9018	89.243	86.6755
	9.2	74.428	68.691	73.8255	69.3671	86.3188	79.5712	94.716	90.8093	81.306	90.8654	75.4293	61.0169	63.6577	88.4956	92.3463	91.3303	77.6371	66.75	82.0768	68.1472	81.0596	82.5916	91.8083	82.9819	86.8027	90	79.1463	83.0013	86.606	84.1448	62.3288	80.9124	80.5627	86.399	89.6893	93.0518	85.2	68.0288	84.2627	86.8914	86.3706	81.2183	86.8493	80.2747	85.3411	84.005	89.6414	86.5435
	9.4	75.9085	70.8502	74.2282	68.2278	87.165	82.7238	96.4333	89.8491	82.3303	91.6667	77.9392	61.0169	64.3611	88.622	91.8444	92.8251	76.6526	67.5	81.7923	68.0203	78.2781	86.1257	91.9629	84.7892	85.5782	90.2857	80.6098	84.0637	87.3862	82.8964	62.8995	82.3529	82.9923	85.6218	91.2429	92.6431	86.2667	71.1538	83.767	87.7653	85.9112	81.9797	87.2603	80.774	83.5994	86.7758	89.6414	89.1821
	9.6	75.6393	70.9852	75.4362	67.9747	86.1777	84.2371	96.3012	90.3978	83.6108	92.3077	75.2972	62.4859	66.2368	88.3692	91.5935	93.423	79.1842	69.25	81.3656	69.0355	81.9868	85.733	92.8903	85.0904	86.3946	90.4286	78.1707	84.4622	86.8661	83.7703	63.242	82.3529	80.3069	86.2694	90.5367	93.733	86.1333	72.2356	83.5192	89.1386	84.5329	80.4569	86.5753	77.6529	89.6952	90.806	89.243	90.1055
	9.8	77.1198	70.5803	76.2416	69.1139	87.4471	82.8499	96.3012	91.7695	82.5864	93.9103	77.2787	62.4859	65.2989	89.6334	92.0954	90.4335	78.481	70.25	83.4993	69.0355	82.1192	83.377	92.272	85.5422	86.2585	91.7143	79.1463	84.3293	88.9467	84.02	63.6986	83.5534	83.2481	84.5855	89.8305	95.6403	86.2667	73.4375	84.1388	89.5131	85.758	81.3452	85.8904	80.2747	85.9216	89.2947	89.1102	91.029
	10	75.5047	71.525	76.6443	70.8861	86.3188	83.6066	95.6407	92.0439	82.3303	91.8269	76.6182	63.3898	65.4162	89.507	92.2208	94.6188	79.4655	69.25	82.9303	68.6548	81.457	83.377	90.5719	85.241	88.4354	92.2857	80.2439	85.6574	89.3368	84.2697	64.726	84.7539	84.6547	88.601	90.678	94.9591	85.8667	74.2788	83.6431	88.764	84.9923	82.7411	86.7123	79.6504	84.18	88.0353	90.3054	86.6755
	10.2	77.9273	72.7395	76.5101	70.5063	86.0367	82.5977	94.716	90.9465	84.7631	91.1859	77.1466	63.9548	65.2989	88.622	92.3463	92.9746	79.8875	68	83.0725	71.5736	81.5894	82.4607	94.745	86.8976	87.619	92	80.9756	87.5166	91.5475	83.2709	63.4703	84.994	83.1202	85.2332	90.5367	95.2316	87.0667	71.6346	85.7497	92.01	87.2894	81.599	86.8493	77.5281	85.6313	89.1688	90.8367	88.7863
	10.4	77.1198	73.4143	76.6443	69.7468	87.3061	82.8499	97.4901	90.3978	83.8668	91.3462	78.5997	64.5198	66.354	91.6561	92.9737	92.8251	80.0281	70.25	84.495	71.9543	81.0596	82.7225	95.8269	84.1867	89.1156	90.4286	78.7805	86.8526	90.8973	85.5181	65.6393	81.3926	83.8875	87.0466	92.0904	96.049	85.8667	72.476	86.3693	89.2634	89.1271	81.8528	85.3425	77.0287	87.8084	89.5466	91.5007	86.9393
	10.6	78.4657	74.8988	76.3758	69.3671	86.8829	84.7415	97.358	93.0041	83.9949	91.5064	80.0528	64.6328	67.0574	90.5183	92.8482	94.6188	81.8565	69	84.7795	71.4467	81.457	84.0314	94.745	84.9398	88.8435	91	79.0244	86.0558	89.987	84.5194	64.4977	82.9532	83.7596	86.658	91.9492	97.2752	85.8667	74.0385	84.2627	91.6355	89.7397	81.8528	84.6575	80.5243	87.9536	91.4358	89.3758	85.4881
	10.8	79.004	73.6842	77.5839	71.3924	87.4471	84.9937	95.7728	90.2606	83.7388	90.3846	78.0713	64.5198	67.4091	90.6448	92.3463	96.2631	81.5752	70.625	84.0683	72.0812	81.7219	87.4346	94.8995	88.7048	89.1156	92.1429	80	86.1886	90.6372	82.7715	64.726	84.8739	84.5269	86.0104	93.5028	94.8229	86.6667	74.2788	87.3606	90.0125	88.6677	82.7411	85.6164	82.2722	85.4862	86.5239	92.2975	89.314
	11	79.2732	74.224	77.1812	74.4304	90.268	82.5977	97.6222	91.2209	84.251	90.2244	80.7133	65.3107	67.4091	88.2427	92.5972	96.1136	81.5752	70	83.926	72.0812	82.2517	84.4241	91.9629	85.8434	90.4762	89.5714	80.4878	87.3838	93.7581	83.2709	64.9543	85.4742	82.9923	85.2332	90.8192	96.4578	88.8	73.9183	86.4932	89.1386	85.758	82.868	86.3014	81.8976	86.7925	92.6952	92.6959	89.4459
	11.2	78.1965	74.4939	77.8523	72.6582	89.1396	84.3632	97.8864	93.0041	84.6351	91.9872	80.4491	65.7627	67.7608	89.2541	92.9737	94.1704	80.5907	70	83.926	72.4619	80.9272	84.555	91.6538	86.747	90.068	94.2857	82.6829	88.0478	91.1573	84.8939	64.0411	83.9136	84.9105	88.0829	91.5254	95.7766	87.6	76.2019	86.3693	91.2609	86.3706	85.4061	89.3151	83.3958	84.0348	90.1763	92.2975	87.9947
	11.4	78.6003	73.5493	76.7785	74.1772	89.1396	84.7415	97.358	92.1811	85.7875	92.7885	81.3738	66.2147	68.1125	90.0126	92.7227	95.5157	81.294	71.625	85.4908	73.731	84.106	84.1623	94.2813	89.3072	91.1565	90.2857	80.8537	88.7118	90.8973	84.5194	65.1826	85.4742	85.1662	86.5285	92.7966	93.733	88	75	86.2454	92.6342	87.5957	85.533	87.9452	80.5243	85.4862	89.4207	91.8991	89.1821
	11.6	80.0808	74.4939	77.5839	74.557	89.2807	84.8676	96.4333	90.535	83.3547	92.6282	80.317	66.6667	67.1747	89.7598	92.7227	95.0673	81.5752	72.375	84.7795	75.1269	84.106	86.1257	95.8269	88.4036	90.4762	92.5714	83.1707	88.4462	91.6775	83.1461	64.9543	85.4742	85.422	86.0104	92.7966	94.0054	86.8	78.726	86.741	90.8864	87.4426	84.0102	86.9863	83.5206	85.1959	90.806	91.3679	91.1609
	11.8	79.9462	75.4386	77.5839	73.9241	90.9732	84.6154	96.3012	92.1811	84.8912	92.6282	80.5812	67.4576	68.2298	90.5183	93.0991	95.2167	82.5598	71.125	86.202	76.0152	83.5762	86.5183	94.745	87.9518	91.0204	92.1429	81.8293	88.579	92.1977	83.3958	65.9817	84.994	85.6777	86.7876	93.2203	95.7766	87.3333	75.9615	86.741	90.387	89.5865	84.6447	87.8082	84.6442	86.0668	90.932	92.0319	89.5778
	12	80.3499	75.0337	78.3893	73.5443	91.2553	85.7503	97.7543	92.1811	84.8912	92.4679	80.4491	68.1356	70.2227	92.1618	93.4755	95.2167	81.9972	71.875	86.0597	75.2538	84.5033	85.3403	94.5904	89.9096	89.5238	91.7143	80.6098	89.243	93.7581	86.1423	66.3242	83.1933	89.2583	86.0104	92.7966	95.9128	87.3333	75.9615	85.6258	90.6367	88.974	84.0102	88.7671	81.3983	88.0987	90.932	92.6959	88.9182
	12.2	79.5424	76.1134	79.0604	74.1772	88.5755	84.7415	99.4716	93.1413	83.9949	91.1859	82.959	67.9096	68.9332	91.6561	92.3463	94.3199	82.4191	71	87.34	76.269	85.0331	86.2565	95.3632	88.253	90.7483	93.8571	81.9512	89.5086	94.4083	86.7665	66.895	84.8739	86.7008	86.7876	92.3729	93.8692	88.4	77.524	86.6171	91.6355	89.7397	85.4061	88.6301	79.7753	87.6633	90.0504	93.0943	90.1055
	12.4	79.677	75.7085	80.1342	75.6962	90.6911	85.7503	97.6222	93.9643	84.8912	91.9872	80.9775	67.6836	69.6366	92.0354	93.0991	93.722	81.7159	71.25	85.7752	74.8731	84.2384	85.4712	96.2906	89.1566	89.7959	92	82.1951	89.7742	94.6684	85.1436	66.4384	85.2341	90.4092	85.6218	91.3842	95.3678	88.5333	78.3654	85.7497	89.7628	88.5145	85.1523	86.8493	84.1448	90.2758	92.1914	90.9695	88.7863
	12.6	80.6191	76.6532	80.6711	75.443	89.4217	86.8852	98.4148	94.3759	85.6594	92.6282	81.9022	68.8136	70.4572	90.1391	93.0991	95.2167	82.8411	72.375	85.4908	75	84.5033	87.4346	93.9722	90.9639	90.2041	90.5714	82.6829	90.4382	93.6281	86.5169	66.6667	89.5558	87.0844	85.4922	92.5141	96.3215	88.9333	79.4471	87.4845	91.7603	89.5865	86.9289	87.5342	85.7678	88.389	91.8136	94.0239	87.5989
	12.8	82.0996	77.058	79.3289	75.9494	91.6784	85.7503	98.2827	93.9643	85.4033	93.4295	83.0911	68.1356	70.5744	91.1504	93.601	94.1704	81.7159	72.875	87.34	76.6497	85.4305	87.1728	96.2906	89.4578	89.6599	91.1429	80.9756	88.4462	94.1482	86.2672	67.0091	87.6351	89.5141	86.9171	91.8079	96.3215	89.3333	79.5673	88.4758	93.1336	90.3522	87.1827	87.2603	87.2659	89.9855	92.9471	92.1647	87.7309
	13	81.1575	77.3279	81.6107	74.9367	91.5374	88.0202	97.6222	93.0041	84.6351	93.2692	82.6948	69.7175	69.5193	91.1504	94.7302	94.7683	83.4037	73.875	86.4865	77.5381	85.1656	86.911	95.9815	91.1145	92.7891	89.8571	82.6829	91.2351	93.8882	85.3933	68.8356	88.2353	87.0844	86.9171	92.9379	95.0954	88.2667	81.3702	87.7323	92.3845	91.1179	86.2944	88.9041	87.1411	89.8403	88.9169	91.5007	89.7098
	13.2	80.2153	77.193	79.0604	75.5696	90.1269	85.8764	97.0938	94.513	86.1716	92.9487	82.8269	69.4915	69.7538	90.2655	94.8557	95.6652	82.5598	74.125	86.4865	76.6497	85.1656	87.3037	92.4266	91.2651	90.6122	91.1429	81.8293	90.9695	93.8882	86.8914	67.6941	88.5954	87.468	86.399	93.3616	95.2316	88.9333	79.9279	88.4758	92.01	90.3522	87.9442	89.4521	87.3908	91.4369	92.6952	91.2351	89.314
	13.4	82.0996	78.2726	80.1342	76.0759	91.1142	87.5158	98.1506	94.9246	85.4033	93.9103	84.2801	69.6045	71.6295	90.1391	94.9812	95.3662	84.6695	75.375	86.771	77.7919	84.9007	88.3508	94.8995	90.512	90.4762	93.1429	82.3171	88.7118	94.7984	86.5169	68.2648	85.5942	87.3402	85.6218	94.0678	94.2779	88.1333	81.9712	87.9802	90.6367	88.0551	87.6904	91.9178	86.5169	90.566	91.9395	92.8287	91.4248
	13.6	82.0996	79.3522	80.1342	75.9494	91.2553	86.633	97.8864	93.4156	86.6837	95.5128	84.9406	70.3955	71.3951	91.4033	94.6048	95.0673	83.685	74.75	88.3357	77.2843	84.7682	88.3508	93.8176	91.8675	91.0204	90.4286	82.9268	89.6414	92.8479	86.7665	68.379	88.2353	87.3402	86.658	93.5028	96.4578	89.0667	80.0481	89.8389	91.5106	88.8208	89.8477	90.137	86.392	90.2758	90.3023	92.9615	90.2375
	13.8	83.5801	78.5425	79.7315	75.1899	91.3963	87.8941	99.2074	93.9643	85.4033	94.5513	84.4122	70.0565	70.8089	91.024	94.9812	95.2167	85.2321	75.625	89.1892	78.8071	85.0331	87.3037	96.5997	90.512	91.2925	89.8571	83.0488	91.5007	93.6281	88.2647	67.6941	87.0348	89.6419	86.2694	92.9379	96.8665	88.1333	81.6106	88.9715	88.8889	90.1991	88.7056	90.5479	86.6417	89.5501	88.9169	94.4223	90.1055
	14	81.2921	77.4629	78.6577	79.2405	91.1142	87.2636	96.4333	94.7874	86.4277	95.3526	84.4122	71.6384	72.2157	89.8862	94.8557	95.0673	85.0914	75.125	88.7624	78.8071	84.5033	88.4817	96.2906	91.5663	92.1088	92.2857	83.5366	89.6414	94.0182	88.015	70.2055	85.114	89.1304	86.7876	91.6667	96.7302	89.6	81.4904	90.5824	91.2609	87.7489	88.4518	90.6849	87.8901	90.8563	89.7985	94.1567	89.0501
	14.2	82.9071	79.4872	80.9396	77.8481	91.5374	88.0202	97.6222	93.69	85.6594	95.1923	83.4875	71.0734	71.9812	93.2996	94.6048	95.9641	84.1069	74.875	87.7667	79.0609	85.1656	87.8272	94.1267	89.006	92.517	90.7143	82.561	92.1647	94.2783	88.015	70.3196	85.3541	89.6419	84.8446	92.0904	95.9128	88.5333	83.6538	88.9715	90.0125	88.2083	87.6904	90.137	84.6442	91.0015	91.9395	93.2271	87.467
	14.4	83.1763	79.7571	82.1477	78.1013	89.8449	88.2724	100	95.0617	86.5557	94.391	84.148	70.6215	73.0363	91.6561	94.9812	96.562	85.7947	75.625	91.4651	79.3147	85.9603	88.089	92.8903	92.3193	94.0136	93.2857	82.561	91.1023	93.368	87.7653	72.2603	86.4346	92.1995	85.4922	91.2429	96.4578	89.6	81.25	89.3432	92.1348	88.8208	89.8477	90.411	87.3908	90.7112	89.6725	94.9535	85.6201
	14.6	81.5612	81.2416	81.2081	79.4937	91.9605	84.9937	98.2827	94.6502	85.6594	93.4295	83.2232	71.4124	72.2157	88.8748	93.8519	94.9178	85.654	73.875	88.7624	79.3147	84.3709	87.8272	91.0355	90.512	92.6531	94.2857	80.8537	90.4382	93.7581	89.3883	72.4886	85.8343	93.8619	84.9741	92.2316	97.2752	87.8667	84.7356	87.9802	92.7591	89.7397	90.1015	89.0411	86.1423	91.2917	92.6952	92.9615	89.5778
	14.8	80.4845	81.2416	82.5503	78.6076	91.1142	88.0202	95.5086	93.69	85.5314	93.2692	83.2232	72.7684	73.0363	91.7826	94.4793	98.2063	84.8101	75.5	91.0384	80.4569	85.6954	88.3508	95.9815	91.1145	91.8367	93.1429	83.2927	91.3679	95.5787	89.8876	72.9452	85.4742	91.8159	85.1036	92.6554	97.6839	89.0667	83.1731	88.9715	92.5094	91.7305	89.9746	90.9589	87.1411	87.9536	91.1839	94.9535	89.1821
	15	82.9071	80.1619	83.2215	78.8608	93.2299	88.0202	98.1506	93.8272	85.7875	94.2308	84.9406	72.4294	73.1536	91.6561	95.6085	97.4589	84.3882	75.25	87.6245	78.934	85.6954	88.3508	94.8995	92.9217	93.3333	93	83.1707	91.6335	94.4083	87.0162	73.7443	87.9952	93.8619	85.3627	94.0678	98.9101	90.4	82.3317	87.4845	92.2597	92.8025	87.5635	89.726	87.6404	89.9855	91.5617	95.3519	87.9947
	15.2	84.3876	80.027	81.6107	78.3544	91.8195	89.9117	98.9432	94.9246	85.9155	93.9103	84.9406	72.4294	73.5053	91.7826	95.4831	97.3094	83.5443	76.25	89.3314	79.5685	86.4901	87.6963	95.6723	93.5241	95.7823	91.2857	84.1463	93.0943	94.9285	89.3883	73.516	87.515	91.8159	86.9171	93.6441	96.594	90.6667	84.976	88.9715	93.0087	93.7213	89.7208	88.2192	87.6404	88.0987	90.0504	95.6175	87.467
	15.4	83.7147	78.8124	81.745	81.1392	91.8195	85.8764	97.7543	95.1989	86.5557	92.4679	85.6011	72.9944	73.857	91.6561	96.4868	97.7578	85.654	75.375	86.771	79.1878	86.4901	91.7539	94.2813	92.9217	93.8776	91	83.1707	90.8367	95.4486	90.6367	72.9452	88.1152	91.1765	86.658	92.7966	97.2752	89.2	84.7356	87.7323	91.2609	93.5681	88.4518	89.726	86.7665	91.582	91.9395	96.2815	90.3694
	15.6	83.9838	79.2173	82.4161	79.8734	91.6784	87.0113	97.8864	96.9822	83.9949	93.2692	84.5443	73.7853	74.5604	90.8976	96.7378	95.8146	84.6695	77.25	89.6159	78.4264	86.4901	89.5288	93.1994	93.5241	94.6939	93.7143	84.2683	92.1647	95.7087	90.387	74.5434	88.4754	91.3043	87.5648	93.0791	97.5477	90.4	84.1346	89.5911	92.1348	91.8836	91.7513	88.3562	86.7665	92.598	90.806	94.4223	86.9393
	15.8	82.5034	79.7571	83.3557	80.2532	91.3963	89.1551	94.1876	95.0617	85.7875	94.391	85.0727	73.7853	74.3259	91.5297	95.3576	95.9641	85.9353	74.5	92.8876	80.8376	85.8278	89.3979	92.5811	93.5241	93.3333	91	84.3902	88.7118	94.5384	91.8851	72.6027	87.1549	93.0946	85.2332	92.7966	96.049	89.8667	84.4952	88.7237	92.7591	90.1991	91.2437	86.7123	87.6404	94.3396	88.4131	95.4847	87.2032
	16	82.5034	81.1066	81.6107	80.5063	91.5374	88.3985	98.5469	97.3937	85.4033	94.5513	86.1295	73.7853	75.0293	92.0354	97.4906	94.7683	85.3727	76.5	91.7496	80.8376	84.6358	89.6597	92.8903	93.6747	92.6531	91.2857	83.5366	89.6414	95.5787	92.5094	71.2329	86.3145	94.2455	85.4922	93.3616	97.6839	89.2	85.3365	89.715	93.3833	92.0368	94.1624	90.411	86.8914	94.0493	94.8363	94.0239	87.5989
	16.2	83.4455	81.1066	81.3423	79.3671	92.1016	88.1463	100	96.7078	85.2753	93.75	86.3937	73.8983	73.857	91.4033	97.4906	94.7683	85.0914	74.375	91.0384	81.0914	86.3576	90.0524	91.3447	95.1807	95.102	90.8571	83.0488	91.3679	94.4083	91.8851	72.6027	87.0348	94.6292	87.0466	94.774	99.0463	89.3333	84.8558	88.7237	93.3833	92.343	90.1015	90.274	87.8901	96.6618	93.4509	93.3599	87.0712
	16.4	84.5222	78.8124	82.2819	78.481	92.9478	89.029	97.358	96.1591	85.9155	92.9487	85.6011	74.6893	76.2016	92.5411	97.7415	95.5157	85.7947	78.25	88.9047	79.6954	85.1656	90.1832	91.9629	95.1807	93.1973	90.2857	84.878	90.4382	97.7893	93.1336	72.3744	85.9544	95.1407	88.7306	93.3616	100	88.8	85.0962	89.3432	92.5094	91.1179	91.2437	89.1781	86.7665	92.0174	92.5693	93.6255	87.5989
	16.6	82.9071	80.2969	81.4765	79.2405	90.8322	90.4161	97.7543	96.2963	86.0435	92.1474	85.6011	74.4633	75.4982	91.2769	97.9925	97.7578	86.3572	77.125	90.3272	79.9492	86.3576	91.7539	95.6723	92.6205	94.1497	92	82.9268	90.4382	96.0988	91.8851	73.7443	87.6351	95.0128	88.342	93.9266	98.7738	89.8667	85.5769	90.9542	93.2584	91.8836	89.467	92.0548	85.3933	87.6633	93.199	93.4927	87.7309
	16.8	84.926	81.9163	82.953	80.2532	91.9605	89.4073	98.5469	95.3361	87.0679	92.7885	85.0727	74.3503	76.2016	92.2882	98.2434	95.9641	86.7792	78.125	88.6202	79.3147	83.7086	90.8377	95.2087	93.5241	94.966	93.7143	83.0488	88.3134	96.8791	92.01	73.6301	87.9952	93.3504	86.7876	95.6215	97.9564	90.5333	84.7356	90.3346	94.1323	93.2619	89.467	92.0548	85.6429	91.1466	92.0655	93.7583	89.0501
	17	82.638	80.9717	83.0872	81.519	92.1016	89.6595	97.358	96.2963	85.2753	92.3077	87.8468	75.9322	75.7327	93.9317	97.9925	95.2167	85.9353	77.5	91.0384	80.0761	84.5033	91.8848	93.5085	94.7289	94.2857	91	85.7317	89.6414	95.1886	91.5106	73.7443	88.4754	93.9898	86.5285	94.0678	97.4114	90.4	85.2163	90.9542	94.8814	91.8836	90.1015	92.7397	88.8889	91.1466	90.3023	95.4847	87.7309
	17.2	84.253	81.6464	82.6846	82.2785	91.5374	90.7945	98.9432	96.7078	86.5557	93.75	89.8283	75.0282	75.8499	93.6789	97.1142	95.5157	86.7792	78	89.7582	80.3299	83.8411	92.9319	92.8903	93.5241	94.2857	91.2857	83.4146	89.6414	95.0585	90.2622	73.516	86.3145	91.4322	86.7876	93.6441	98.2289	91.0667	87.2596	90.9542	94.8814	91.2711	92.3858	92.6027	86.7665	90.566	90.5542	95.6175	88.5224
	17.4	83.8493	82.3212	83.0872	81.519	90.5501	91.5511	95.7728	95.8848	85.6594	94.5513	86.1295	74.8023	75.7327	91.1504	97.4906	96.2631	87.0605	77.25	91.1807	79.8223	87.6821	92.1466	94.2813	92.0181	95.7823	93.5714	83.0488	89.243	94.4083	89.0137	73.516	88.2353	92.5831	87.1762	94.3503	98.3651	90.5333	85.9375	91.6976	93.7578	90.8116	91.7513	93.5616	89.0137	91.0015	89.6725	96.2815	86.8074
	17.6	85.0606	80.9717	82.5503	81.0127	90.6911	88.2724	98.8111	96.7078	85.7875	92.4679	87.5826	75.2542	77.374	91.5297	96.6123	98.6547	86.0759	78.375	91.6074	80.0761	84.9007	94.1099	94.1267	93.9759	94.1497	91.1429	84.1463	91.3679	96.3589	90.0125	75.3425	88.7155	93.2225	85.4922	94.209	97.2752	90	84.7356	89.4672	92.5094	92.343	93.2741	92.0548	87.2659	89.6952	90.806	94.5551	91.029
	17.8	83.3109	83.1309	82.4161	82.5316	91.3963	90.1639	98.1506	98.0796	85.5314	93.109	87.9789	76.0452	75.9672	92.0354	98.2434	98.2063	86.3572	80.125	91.0384	81.599	83.4437	90.3141	90.7264	93.5241	93.6054	95.7143	83.4146	91.5007	95.7087	90.6367	76.1416	88.7155	91.9437	87.6943	95.0565	99.1826	90.4	85.0962	88.5998	95.1311	92.8025	93.0203	93.5616	90.6367	90.4209	91.5617	94.9535	86.0158
	18	83.8493	82.3212	81.8792	80.2532	89.8449	90.0378	96.3012	97.668	87.1959	93.2692	86.79	75.3672	77.4912	94.1846	97.7415	97.1599	86.6385	79.25	90.4694	82.2335	85.4305	91.2304	89.9536	91.7169	94.966	94.1429	83.2927	91.6335	95.5787	90.2622	76.484	88.4754	93.0946	85.6218	94.6328	99.5913	89.7333	85.0962	91.0781	93.633	93.8744	92.7665	93.1507	89.0137	90.1306	93.199	94.8207	86.8074
	18.2	84.3876	81.3765	82.8188	83.6709	91.6784	87.5158	97.0938	96.4335	86.6837	92.6282	86.9221	76.1582	78.3118	94.0582	97.4906	98.2063	87.3418	77	91.6074	82.9949	86.6225	92.1466	92.272	94.7289	94.2857	93.5714	84.6341	91.7663	96.3589	89.8876	77.8539	87.7551	92.1995	83.4197	93.9266	98.7738	89.6	86.5385	90.7063	93.7578	95.7121	90.9898	93.2877	89.0137	89.2598	93.073	94.8207	85.2243
	18.4	83.8493	82.1862	82.953	82.4051	91.2553	88.6507	97.2259	96.2963	87.1959	91.6667	85.469	76.2712	77.9601	94.0582	97.867	98.9537	86.2166	78.375	91.3229	80.9645	86.2252	92.2775	91.8083	95.0301	94.2857	92.8571	83.9024	91.8991	95.3186	91.2609	76.9406	88.4754	95.3964	87.5648	95.7627	97.139	88.5333	87.1394	90.9542	94.1323	93.5681	93.401	93.1507	87.1411	87.6633	90.1763	95.6175	87.467
	18.6	84.5222	83.5358	81.6107	82.2785	90.1269	89.5334	99.2074	97.8052	85.7875	94.5513	88.9036	76.6102	77.8429	92.9204	97.867	97.0105	86.0759	79.5	92.0341	82.2335	86.6225	91.4921	91.0355	94.2771	93.7415	92.2857	85.8537	91.8991	96.3589	90.8864	76.1416	88.1152	96.1637	88.601	95.1977	95.6403	88.9333	86.7788	89.8389	93.1336	94.7933	89.3401	94.9315	86.7665	85.4862	90.6801	96.0159	89.0501
	18.8	83.1763	81.1066	82.8188	84.0506	92.2426	90.1639	96.6975	96.9822	86.9398	94.5513	85.8653	76.8362	77.8429	93.6789	98.1179	100	86.6385	80.875	91.8919	82.3604	86.2252	91.623	92.5811	92.3193	93.3333	93	86.3415	92.4303	97.0091	93.0087	75.6849	89.6759	93.8619	85.6218	94.9153	97.4114	89.0667	87.9808	89.8389	93.0087	91.5773	92.132	94.6575	87.5156	90.8563	94.4584	96.6799	87.467
	19	85.0606	81.3765	84.8322	82.2785	92.1016	89.1551	99.3395	98.7654	85.9155	93.109	89.9604	76.8362	77.9601	94.6903	98.4944	98.8042	87.7637	77.125	92.1764	81.599	85.4305	93.1937	91.8083	92.9217	96.8707	94	85.2439	91.5007	96.749	92.6342	76.3699	88.7155	94.3734	87.1762	94.6328	95.5041	89.6	87.5	89.0954	90.5119	93.415	91.8782	93.4247	88.3895	90.2758	91.4358	96.0159	88.3905
	19.2	82.5034	83.5358	84.4295	83.2911	92.3836	91.6772	94.5839	97.3937	86.6837	93.2692	89.432	76.6102	78.5463	93.5525	98.6198	97.7578	87.3418	77.5	91.7496	82.2335	85.4305	92.1466	93.1994	95.7831	94.0136	92.5714	85.6098	89.3758	98.8296	91.7603	76.3699	90.036	94.6292	87.4352	94.9153	97.4114	87.6	87.5	89.8389	93.0087	93.7213	92.8934	90.6849	88.3895	92.598	90.1763	95.8831	85.3562
	19.4	84.926	83.4008	83.7584	82.9114	94.0762	90.4161	96.4333	96.0219	85.6594	94.0705	88.5073	77.4011	80.6565	96.2073	99.3726	96.4126	86.3572	78	89.7582	83.1218	87.2848	92.5393	92.4266	93.3735	95.6463	91.1429	84.5122	91.2351	100	90.1373	75.7991	88.9556	94.2455	87.5648	94.209	95.9128	88.4	88.7019	89.9628	94.5069	93.5681	94.0355	89.589	88.6392	92.7431	94.3325	96.4143	84.6966
	19.6	82.638	82.0513	84.1611	81.7722	91.3963	88.6507	95.7728	97.2565	87.1959	93.75	88.111	77.2881	80.0703	93.6789	99.2472	97.0105	87.7637	78.125	91.0384	82.868	83.9735	90.9686	91.6538	92.3193	96.7347	92.4286	83.5366	90.3054	97.6593	90.6367	76.3699	89.916	93.9898	87.9534	94.209	95.7766	89.6	89.4231	89.8389	96.8789	94.9464	93.0203	91.6438	88.764	87.9536	93.8287	96.8127	86.9393
	19.8	84.5222	82.1862	82.0134	83.1646	91.3963	90.29	95.3765	97.8052	84.251	93.109	89.1678	77.1751	80.422	93.8053	98.2434	97.9073	86.3572	80.5	93.7411	83.3756	87.1523	89.9215	92.4266	93.5241	97.551	94.1429	86.7073	90.0398	98.1795	91.7603	77.8539	88.4754	93.0946	87.3057	94.4915	96.4578	88.9333	87.7404	90.7063	94.8814	94.6401	94.6701	93.2877	90.387	89.9855	89.4207	97.6096	85.4881
	20	83.9838	82.5911	82.5503	82.5316	92.1016	89.9117	97.358	97.1193	87.58	92.6282	87.4505	77.5141	80.422	92.1618	100	97.7578	87.0605	81.625	91.4651	83.5025	86.0927	92.2775	91.8083	93.3735	95.102	93	84.2683	89.6414	97.5293	92.1348	78.653	89.4358	92.8389	87.8238	95.7627	95.2316	87.6	87.9808	89.3432	94.5069	95.0995	92.8934	93.8356	90.5119	91.8723	89.7985	96.8127	88.5224
[truncated: 394 more columns]
