# Supplementary material for: Targeting an anchored phosphatase-deacetylase unit restores renal ciliary homeostasis
Source: eLife. 2021 Jul 12;10:e67828. doi: 10.7554/eLife.67828 (PMC8291974; doi:10.7554/eLife.67828)
Supplement: Figure 4—source data 2. [file elife-67828-fig4-data2.xlsx]

## Sheet: Sheet1
		Figure 4R- Half life of lifeact GFP
		Wildtype	AKAP220-/-	AKAP220-ΔPP1
		1.01	1.09	2.24
		0.62	1.31	1.5
		0.88	1.56	0.71
		1.18	0.9	3.76
		0.83	1.38	1.49
		1.13	1.1	1.54
		0.42	0.83	1.27
		0.76	0.56	2.71
		1.4	1.31	2.34
		0.47	0.77	1.55
		0.81	1.32	1.07
		0.56	1.33	1.35
		0.25	1.36	2.06
		1.88	0.53	1.83
		1.17	1.53	2.37
		0.82	1.36	2.37
		1.6	2.34	1.39
		1.14	3.22	0.57
		1.26	1.38	3.08
		0.57	1.32	1.14
		1.04	1.12	1.92
		1.31	2.44	2.68
		1.29	1.51	1.04
		1.37	0.79	1.4
		0.3	1.93	1.21
		1.3	1.71	3.96
		1.04	1.06	4.58
		2.22	1.51	2.76
		0.78	1.79	2.2
		0.75	0.8	1.84
		1.72	0.96	1.73
		0.52	1.33	2.02
		0.78	1.42	1.92
		0.36	1.39	2.28
		0.71	0.89	1.58
		0.48	1.27	1.38
		0.49	3.18	1.73
		0.16	2.37	1.91
		0.31	1.08	1.38
		0.8	2.27	3.51
		1.44	4.07	1.35
		0.4	2.07	2.69
		0.96	2.37	1.83
		0.74	1.08	1.24
		0.74	2.49	1.84
		3.17	2.62	0.66
		0.5	1.37	0.51
		1	1.05	2.19
		0.79	2.26	1.67
		0.5	1.27	0.96
		0.52	2.42	0.75
		0.76	1.41	1.64
		0.5	1.75	1.17
		1.52	1.47	2.85
		0.68	1.07	0.98
		0.45	0.75	1.23
		2.04	0.78	1.82
		0.52	1.65	2.72
		0.8	3.12	1.82
		0.57	1.03	5.12
		0.85	0.98	1.05
		0.81	0.56	1.56
		1.01	0.5	1.91
		0.79	1.62	1.78
		1.24	1.55	0.8
		0.52	1.14	1.37
		0.61	1.34	1.03
		1.03	4.56	3.99
		0.49	1.48	1.77
		0.52	0.38	0.49
		0.53	1.08	1.36
		1.05	1.19	2.05
		1.13	0.49	0.78
		0.76	0.76	0.77
		0.79	0.66	1.17
		0.65	2.42	2.56
		0.63	0.76	1
		0.52	1	1
		0.55	1.8	0.96
		1.06	1.55	3.72
		0.38	1.07	1.36
		1.67	0.9	2.12
		2.06	0.8	1.86
		0.5	1.64	0.75
		0.82	1.12	1.14
		0.43	1.46	0.8
		0.72	1.98	0.41
		1.24	0.85	1.09
		1.05	2.84	1.09
		1.02	3.5	1.2
		0.57	2.77	0.99
		0.98	0.82	0.73
		1.53	0.75	0.99
		2.13	4.2	1.81
		1.17	2.76	1.28
		0.73	2.31	0.81
		0.72	1.49	1.03
		0.9	0.89	0.79
		1.96	1.29	1.43
		0.62	1.9	2.46
		0.65	0.58	2.24
		1.14	1.13	1.59
		0.25	0.51	1.63
		0.51	2.25	1.51
		0.48	2.25	3.7
		1.03	2.68	4.07
			2.25	1.36
			4.26	2.35
			1.59	2.71
			1.57	2.22
			0.7	3.06
			0.83	4.41
			1.51	2.22
			0.6	0.99
			2.46	0.79
			2.05	3.28
			0.56	1.06
			0.84	2.11
			2.28	1.65
			3.57	1.81
			2.29	2.83
			3.5	1.44
			2.11	1.26
			1.63	0.74
			0.78	1
			1.71	1.54
			1.81	1.05
			1.16	0.92
			2.87
			1.75
			1.65
			1.87
			2.2
			2.17
			0.91
			0.95
			1.06
			1.38
			4.42
			1.72
			1.65
			1.92
			2.47
			1.07
