# Supplementary material for: Targeting an anchored phosphatase-deacetylase unit restores renal ciliary homeostasis
Source: eLife. 2021 Jul 12;10:e67828. doi: 10.7554/eLife.67828 (PMC8291974; doi:10.7554/eLife.67828)
Supplement: Figure 4—source data 3. [file elife-67828-fig4-data3.xlsx]

## Sheet: Sheet1
		Figure 4S- Mobile fraction of lifeact-GFP after photobleaching
		Wildtype	AKAP220-/-	AKAP220-ΔPP1
		0.93	1	0.98
		1	1	0.99
		1	0.99	1
		0.98	1.03	1.14
		1	1.02	1
		1.02	0.98	1
		0.93	0.97	1
		0.95	0.93	1.07
		0.97	1.1	0.99
		0.96	0.97	0.99
		0.96	0.98	1
		0.99	1	0.99
		1.04	0.97	0.98
		1.02	1	0.98
		0.99	0.99	0.98
		1.05	1	1
		0.91	0.98	1
		1	0.99	0.98
		0.98	0.99	0.98
		0.94	1.01	1
		0.98	0.96	1.04
		0.96	1.01	0.99
		0.92	0.99	0.96
		1.01	0.94	0.99
		0.96	0.99	1.05
		0.98	0.99	0.95
		1	0.98	1.03
		0.98	0.98	0.98
		0.96	0.96	1.01
		0.99	0.97	0.98
		0.9	0.97	1
		0.97	1	1
		0.91	0.98	1
		0.87	1.03	1
		1.01	1	0.96
		0.98	1	1.066
		1	1.11	0.91
		0.85	0.96	0.97
		0.76	0.99	1
		0.96	0.99	1
		0.96	1	1.03
		0.84	1.01	0.72
		0.9	0.94	0.99
		0.99	0.99	0.98
		0.97	1.02	0.99
		0.86	0.94	0.98
		0.92	0.97	1.02
		0.91	0.94	1.05
		1.03	0.8	1.02
		0.92	1	1
		0.94	0.98	0.98
		1.01	0.98	1.02
		0.95	0.98	1.01
		0.78	1	0.93
		0.9	0.95	0.97
		1	0.98	0.96
		0.99	0.88	1.02
		1.01	1.08	0.95
		1.01	0.97	1.02
		1.02	0.93	1
		0.83	1	1
		0.95	1.12	1
		1.03	1	0.99
		1	0.99	0.97
		0.98	1	0.94
		1.13	0.94	0.96
		0.7	1	0.97
		0.96	1	0.87
		1	1	0.99
		0.98	0.98	0.9
		1.01	1.01	0.98
		1.1	0.95	0.72
		0.88	0.98	0.99
		1.15	1	1
		1.13	0.93	0.91
		0.93	0.97	1.09
		1.03	1.01	0.95
		0.89	0.99	0.99
		0.93	0.97	0.96
		1.01	0.99	1
		1.08	0.99	0.98
		0.83	0.96	0.97
		0.94	1	1.17
		0.92	1.02	1
		0.97	0.95	0.94
		0.9	1	1
		0.88	1.06	0.91
		0.95	1.1	0.98
		0.96	0.98	0.98
		1.11	0.93	1.03
		0.96	0.98	1
		0.97	1.01	1.17
		1	1.04	0.98
		1	0.99	1
		0.92	0.87	0.95
		0.99	1	0.95
		0.97	0.97	1
		1.07	0.99	0.98
		0.99	1	0.9
		0.97	0.98	0.97
		0.98	0.98	0.95
		0.9	1.04	0.93
		1	0.96	0.91
		0.99	0.95	1.05
		0.97	0.94	0.99
		0.35	0.9	0.99
			0.93	0.24
			0.99	0.98
			1.01	1.1
			0.93	0.98
			1.16	0.94
			0.99	1
			0.95	0.99
			0.98	1.08
			0.97	0.98
			0.99	1.01
			1.27	0.93
			1.09	0.99
			0.97	1
			0.93	1
			0.99	1.04
			0.95	0.97
			0.98	0.99
			0.99	0.99
			0.98	1.06
			0.96	1.02
			1.04	0.98
			1	1
			0.96
			0.99
			1.01
			0.98
			0.97
			0.99
			0.93
			1
			1.15
			0.97
			1.06
			0.97
			0.99
			0.99
			0.97
			0.97
