# Supplementary material for: Targeting an anchored phosphatase-deacetylase unit restores renal ciliary homeostasis
Source: eLife. 2021 Jul 12;10:e67828. doi: 10.7554/eLife.67828 (PMC8291974; doi:10.7554/eLife.67828)
Supplement: Figure 4—source data 4. [file elife-67828-fig4-data4.xlsx]

## Sheet: Sheet1
						Figures 4I, 4K, 4M measuring actin intensity along line plots
	X	AKAP220-DPP1
	0	27.111	50	19.333	29	14.889	28	26.333	51.556	51	29	48.889	37.333	17.667	52	49.556	27.667	37.444	60.556	37.444	38.667	40	11.222	17.889	30.444	16	14.222	22.667	34.351	37.355	23.82	22.919	31.667	31.889	23.667	29	33.222	23.333	36	24.556	41.568	60.298	55.667	43.667	32.333	46	23.556	40	41.111
	0.2564	29.641	56.003	26.177	30.056	18.954	31.023	35.719	59.247	53.924	32.174	45.771	34.204	18.811	48.632	46.514	34.139	35.98	63.833	35.255	38.615	34.467	9.279	21.663	27.719	23.169	14.361	26.348	39.567	35.899	25.335	24.65	36.22	34.444	20.349	30.333	31.127	23.684	30	31.667	49.574	63.925	48.875	50.329	30.111	51.728	25.403	41.009	40.314
	0.5128	25.28	56.937	26.977	28.809	19.902	26.777	47.848	63.494	56.511	35.146	42.533	37.981	23.242	43.924	38.608	41.935	35.516	62.099	32.343	44.91	30.386	12.464	21.755	26.516	39.243	15.502	30.121	37.598	36.954	28.24	25.178	35.28	25.111	16.669	28.876	34.112	24.3	37	36.506	46.67	65.072	46.054	59.867	30.717	59.649	28.791	41.726	41.558
	0.7692	28.065	45.966	28.181	30.294	27.247	25.259	63.112	65.613	59.958	31.324	42.282	35.127	28.185	53.749	36.541	41.006	43.919	58.926	34.172	50.605	24.934	10.905	22.473	26.308	36.954	14.309	29.295	37.728	41.872	33.216	22.057	26.851	20.778	20.023	33.223	48.472	23.743	29	35.956	45.432	57.678	46.28	59.772	37.633	60.921	28.361	42.686	43.311
	1.0256	24.185	42.011	31.629	32.032	28.498	28.905	72.115	66.346	54.12	32.375	47.677	33.667	33.832	59.454	42.693	41.219	47.611	52.787	42.232	50.739	24.845	9.591	26.43	26.394	32.413	12.59	27.242	37.075	45.797	32.648	22.401	28.353	17.444	21.417	34.715	76.44	27.04	41	36.745	47.278	55.511	49.501	54.854	37.728	47.238	23.899	44.407	47.901
	1.2821	31.213	42.9	31.419	31.083	19.364	24.465	65.128	62.844	39.036	38.493	51.565	38.881	37.773	55.152	55.547	38.976	46.484	49.006	46.642	50.908	33.086	10.975	30.839	28.894	39.361	14.385	23.295	32.024	51.938	32.87	26.019	31.457	15.667	23.453	34.767	70.898	30.5	46	36.362	43.649	56.794	51.126	44.269	36.875	50.779	25.272	43.914	56.643
	1.5385	34.962	36.034	27.943	27.44	15.877	20.162	53.053	63.551	32.779	43.594	56.853	38.454	37.863	50.869	58.558	33.168	45.496	45.577	47.849	50.824	45.183	10.97	34.206	23.233	45.289	21.016	26.576	36.647	55.664	31.105	29.611	27.893	19	26.819	42.598	37.158	27.627	41	36.825	42.634	59.675	56.288	45.237	45.027	60.723	23.703	36.722	62.864
	1.7949	35.036	37.98	24.498	25.882	16.686	21.511	48.963	58.199	26.604	41.266	55.919	37.296	31.493	48.741	52.613	30.761	51.002	44.277	43.489	52.788	46.161	12.714	35.049	23.534	47.663	21.903	26.939	31.559	56.141	30.497	31.127	24	24.333	29.21	45.342	38.552	20.988	40	38.939	43.241	68.104	59.712	44.641	49.762	47.231	26.58	33.468	54.375
	2.0513	29.839	36.977	20.488	25.61	23.251	28.055	44.243	48.65	32.692	45.361	55.348	42.794	36.674	46.029	49.244	36.521	47.258	46.263	38.577	52.581	32.554	13.358	31.393	21.747	34.747	20.385	23.121	28.653	51.936	29.098	33.804	23.903	25.444	28.628	44.736	42.793	18.427	30	47.79	47.779	78.514	62.127	45.331	47.361	48.702	29.698	32.46	46.338
	2.3077	27.604	36.077	19.525	24.139	28.985	33.855	42.891	55.333	34.066	48.132	52.096	47.726	37.146	49.826	51.861	40.506	63.103	48.83	34.431	49.999	24.174	13.376	26.571	23.281	25.983	22.209	22.886	23.67	47.625	26.284	34.086	23.245	32	31.464	34.84	42.633	15.897	34	55.093	42.605	78.698	65.092	44.708	46.408	52.205	32.09	34.399	39.403
	2.5641	30.382	39.313	21.519	27.322	29.024	38.784	44.598	49.811	34.312	52.375	50.948	47.055	32.17	49.587	45.924	37.812	63.418	52.001	32.872	43.744	21.678	13.426	25.414	24.835	24.04	17.148	28.091	23.015	44.459	26.545	31.217	29.231	27.444	25.037	25.344	40.372	16.889	34	54.787	38.177	73.067	69.883	41.708	52.744	62.386	34.716	39.56	33.55
	2.8205	25.453	49.875	22.146	30.27	28.277	31.761	51.208	42.28	32.406	53.226	50.511	44.413	25.596	50.359	40.077	37.166	58.546	51.893	32.388	40.306	30.007	15.126	25.985	23.556	24	13.765	27.75	22.082	46.864	26.989	23.446	27.994	21.222	20.52	20.594	35.297	21.367	32	56.586	39.418	72.56	79.886	43.78	50.787	71.839	29.975	43.318	32.723
	3.0769	23.023	46.274	25.645	31.439	30.868	28.342	55.746	45.761	30.361	48.806	51.393	47.563	24.805	57.23	41.947	34.245	52.855	51.706	34.63	41.977	41.545	18.176	25.295	19.144	28.671	18.986	24.758	26.04	47.139	32.488	22.934	26.569	18.778	16.975	20.032	36.166	16.387	32	54.935	41.312	66.075	80.336	42.55	51.653	75.821	28.028	46.781	29.588
	3.3333	21.815	53.963	25.808	32.335	30.148	26.598	53.72	51.263	33.985	45.286	55.226	38.81	25.805	58.26	43.137	40.717	44.439	45.663	33.323	41.699	48.534	15.559	29.12	18.198	31.012	19	21.682	24.699	49.449	36.822	27.678	25.196	21.333	21.288	22.323	37.322	18.336	29	46.866	46.303	65.233	85.547	48.767	48.286	66.419	34.967	50.184	33.655
	3.5897	29.128	52.601	26.299	31.143	29.424	25.306	46.671	53.181	33.585	40.069	60.957	34.664	27.661	57.481	50.88	37.348	36.012	51.754	28.746	43.485	45.338	15.423	34.845	18.614	29.203	20.958	24.182	24.679	51.6	34.945	30.695	26.591	26.222	27.403	26.876	39.462	19.867	33	45.461	52.344	56.004	85.73	50.541	47.143	56.458	29.76	52.383	34.5
	3.8462	34.857	43.043	25.803	28.659	29.367	33.347	40.661	47.79	30.623	34.48	53.109	37.129	37.458	61.167	51.167	32.467	32.758	51.305	29.96	51.003	44.503	14.977	34.165	22.949	27.13	20.376	21.682	28.756	58.435	29.205	28.989	33.493	22.667	22.64	26.143	58.339	19.417	45	54.12	51.133	54.155	76.879	54.981	45.844	49.525	32.142	49.506	35.22
	4.1026	31.531	44	26.476	31.176	26.052	39.757	40.123	42.716	24.135	32.667	49.415	41.433	48.805	66.493	51.087	31.75	29.026	51.705	28.478	46.779	52.634	16.594	29.518	21.89	24.855	20.575	26.545	31.357	52.483	31.53	27.451	47.712	20	22.875	24.351	74.739	22.258	45	59.658	47.755	51.611	70.313	58.713	46.624	61.017	28.261	41.526	37.216
	4.359	27.193	44.484	28.98	29.662	21.676	41.527	39.107	38.198	22.985	32.621	55.603	39.967	35.819	58.498	57.741	30.962	30.31	49.054	27.358	46.523	58.561	17.942	28.748	20.819	24.173	22.466	25.879	27.964	49.123	28.317	29.471	56.333	21.444	20.075	27.446	62.69	26.713	39	53.323	47.069	55.918	73.843	52.313	47.397	61.872	27.822	32.724	32.833
	4.6154	28.036	54.051	25.522	27.81	21.766	39.176	44.864	43.235	21.894	44.747	57.581	39.644	27.696	58.35	63.73	28.215	32.154	42.966	35.836	45.477	54.2	15.34	31.718	25.406	26.382	27.626	25.636	19.785	53.374	26.387	34.152	47.659	27.333	22.521	27.28	44.694	27.56	34	43.699	49.562	57.811	68.589	48.806	43.279	55.376	36.272	34.982	29.302
	4.8718	36.564	55.054	25.942	26.762	22.301	42.052	50.607	58.712	21.129	45.565	56.207	37.8	29	66.978	61.342	29.182	34.249	37.715	46.292	48.095	42.114	16.947	33.476	24.785	28.184	27.334	22.462	16.288	59.08	26.627	38.633	42.079	34	19.734	29.273	39.715	24.053	36	41.067	46.488	57.488	54.161	51.781	42.868	52.452	47.897	38.432	32.719
	5.1282	47.346	55.772	26.84	25.035	20.897	48.047	53.085	75.626	31.761	34.125	63.385	34.856	34.559	70.854	49.511	33.177	40.86	47.094	49.244	47.72	31.839	21.2	35.654	25.871	31.174	24.101	23.485	16.966	67.12	29.035	35.041	34.805	36.556	23.432	29.101	48.569	23.333	33	45.66	49.876	56.92	50.129	60.431	44.846	55.63	43.016	37.569	30.025
	5.3846	44.335	52.299	29.544	25.859	23.8	49.308	54.926	72.23	32.953	29.78	56.248	30.19	36.669	65.222	50.291	42.321	41.774	56.459	41.733	48.111	35.731	16.119	34.995	21.739	37.569	26.064	27.015	18.165	76.885	31.933	37.991	35.416	41.444	28.065	29.493	64.379	23.757	41	48.646	56.08	74.834	57.013	57.897	45.286	59.935	29.921	35.828	27.958
	5.641	43.89	57.188	28.494	32.263	25.218	51.474	56.3	69.568	23.687	28.094	40.228	32.638	37.42	55.615	47.94	47.832	38.123	68.12	32.619	51.116	55.146	14.285	33.709	24	32.787	21.689	24.333	18.463	82.67	33.014	34.899	37.636	47	33.011	26.917	62.969	22.242	37	48.234	55.773	92.876	61.345	61.091	52.909	65.362	26.082	38.458	29.348
	5.8974	47.606	59.934	32.701	33.883	25.087	48.113	50.632	77.074	20.026	21.584	40.748	37.176	42.271	59.81	57.167	45.472	33.895	58.39	30.587	53.706	68.882	16.921	35.589	23.75	34.31	19.856	22.409	21.454	101.89	30.209	37.334	38.493	49.667	36.496	22.105	47.296	26.037	37	50.351	50.845	104.619	62.185	57.294	58.197	52.72	29.597	34.527	35.317
	6.1538	47.494	59.137	30.85	32.061	29.113	43.562	60.574	100.152	22.653	19.111	58.574	35.543	43.821	74.781	56.502	38.646	26.248	73.576	34.252	55.418	65.675	19.149	40.107	19.693	48.535	19.286	26.121	23.009	148.313	33.247	34.569	44.428	50	30.87	23.373	31.848	25.907	34	53.387	49.531	112.571	55.834	46.475	67.646	50.769	34.15	35.038	39.972
	6.4103	40.668	61	26.543	33.87	29.591	42.52	58.945	119.396	21.339	21.107	67.085	39.499	42.015	80.415	57.861	32.163	19.746	73.029	36.486	60.263	62.061	18.49	43.924	19.84	78.601	19.989	25.591	24.15	196.36	34.674	32.359	48.601	45.778	27.16	22.386	31.282	25.056	28	55.284	54.201	116.661	52.409	42.263	94.862	48.212	40.285	34.374	44.007
	6.6667	36.591	60.333	24.404	34.375	33.396	47.158	52.964	130.84	18.816	27.361	61.934	44.683	53.114	80.982	55.083	34.365	23.668	52.961	37.408	65.481	60.86	22.217	36.238	18.184	157.515	20.844	30.818	22.408	223.577	31.154	31.03	73.826	49.222	20.325	29.583	41.553	21.82	25	54.203	48.473	126.601	56.448	40.191	139.54	51.857	45.514	33.853	45.773
	6.9231	40.426	52.154	24.291	34.9	38.793	45.089	50.395	144.741	20.961	42.046	59.78	42.358	92.499	78.955	58.038	36.174	33.626	51.628	43.479	66.113	57.786	26.127	29.633	17.829	245.56	22.821	35.303	19.917	242.15	35.398	32.503	154.465	55.889	21.512	28.52	49.476	25.463	30	53.979	48.319	131.245	61.62	45.564	191.068	55.72	38.662	34.879	53.504
	7.1795	39.558	54.399	24.191	29.301	37.505	51.114	45.553	146.538	23.829	66.917	59.11	45.778	167.751	75	60.986	35.516	34.439	55.25	54.153	60.576	46.325	29.86	34.628	20.683	255	20.509	31.848	20.869	254	31.659	33.621	236.755	62.111	25.242	20.209	48.267	28.52	22	48.965	44.899	137.681	65.823	51.675	209.587	54.404	39.8	37.269	50.777
	7.4359	46.62	59.496	26.866	27.352	36.912	58.599	43.883	157.321	26.587	91.033	82.855	41.45	240.596	79.496	72.094	40.831	33.067	51.331	71.682	57.233	39.931	28.532	38.945	19.006	255	19.47	35.28	17.127	254.447	30.736	34.55	232.025	74.222	21.202	26.642	56.643	26.71	23	46.078	48.199	142.612	75.772	56.334	213.914	64.242	36.007	37.191	44.804
	7.6923	47.721	64.316	30.474	26.951	45.449	58.706	36.376	183.691	27.213	108.559	120.938	41.253	253.319	73.8	83.672	41.012	42.507	47.759	111.469	51.982	44.772	36.056	39.232	16.504	253.962	19.812	45.303	16.042	255	31.592	31.975	219.179	91.333	18.427	22.238	83.278	23.333	21	48.278	56.501	146.379	83.858	57.572	227.837	66.606	39.785	39.097	44.736
	7.9487	49.88	56.823	33.854	29.418	56.576	71.692	40.169	202.823	22.899	123.419	146.967	39.805	227.132	55.21	89.934	43.521	44.859	44.213	155.585	51.093	44.935	50.857	36.903	18.978	231.915	19.18	46.78	20.544	252.504	32.17	28.023	209.576	108.222	19.943	25.736	101.164	27.606	28	54.399	60.149	155.153	102.584	67.417	217.444	61.958	36.992	42.089	47.279
	8.2051	44.658	54.635	34.389	37.087	56.798	91.196	40.137	217.305	22.307	129.556	176.729	46.722	182.849	34.969	80.811	42	41.857	42.485	195.851	51.982	45.575	72.259	33.51	20.419	213.481	22.302	37.636	18.702	252.057	39.918	27.192	190.524	121.556	22.092	30.295	105.001	29.12	30	50.014	59.201	171.687	127.542	61.386	219.195	56.133	38.133	46.143	59.461
	8.4615	46.158	51	41.318	41.076	54.071	107.607	44.269	218.21	33.125	129.799	197.395	65.858	135.504	30.381	88.526	44.124	46.458	48.244	220.34	56.116	52.616	96.317	33.995	26	184.848	26.423	41.583	22.48	253.818	40.509	27.477	184.571	125	24.733	42.684	89.898	29.247	34	34.154	57.801	178.708	152.775	46.108	203.027	52.609	42.88	47.968	71.02
	8.7179	51.458	51	59.714	41.188	57.372	116.278	43.586	245.926	41.055	115.438	193.858	69.174	90.509	26.876	101.866	40.832	43.858	58.776	172.579	56.212	61.811	122.275	30.141	25.405	139.943	22.198	49.121	21.136	253.659	42.693	33.107	161.778	132.222	26.889	65.792	78.116	27.064	26	36.743	56.046	204.666	191.785	49.935	182.832	51.324	45.979	49.021	76.333
	8.9744	53.022	50.701	62.559	37.004	47.543	111.526	46.475	255	29.693	97.413	183.508	58.841	52.861	28.189	112.466	37.361	47.216	62.736	82.94	54.758	61.822	141.415	27.602	28.584	101.389	23.448	59.636	20.241	255	53.014	37.195	132.127	141.222	28.421	79.815	90.264	24.583	27	40.754	56.319	209.634	223.713	52.81	159.333	47.542	50.627	52.638	72.286
	9.2308	46.004	48.41	62.566	37.012	52.602	105.151	47.075	247.37	19.582	86.819	165.455	55.027	31.433	28.311	119.849	41.969	43.105	62.093	30.778	49.063	62.197	159.131	28.95	29.898	70.046	23.813	59.364	23.606	255	66.516	37.233	106.058	145.667	35.956	85.777	116.637	29.627	30	34.578	65.373	195.717	252.62	56.902	156.231	46.492	46.364	56.46	74.356
	9.4872	51.071	52.211	69.693	44.457	59.204	107.324	48.773	220.661	20.957	84.888	144.618	55.805	18.654	31.27	136.802	55.888	41.815	55.745	18.207	50.768	78.722	184.058	30.973	29.391	53.046	24.598	65.795	22.159	255	78.772	36.743	82.749	145.111	35.639	83.233	141.503	40.377	30	33.07	80.491	181.631	254.622	55.995	165.143	43.352	44.918	59.342	67.52
	9.7436	59.714	53.567	66.873	51.046	61.451	104.031	48.299	162.082	27.33	89.132	140.176	54.639	14.444	33.942	173.842	68.572	37.588	52.627	14.771	47.597	79.551	175.151	34.091	33.122	41.061	25.439	86.576	26.23	254.216	100.444	32.782	62.161	133.889	35.807	83.613	167.383	56.773	27	40.105	120.452	162.794	255	55.58	176.98	41.655	48.468	68.509	60.244
	10	57.542	49.556	63.642	52.038	75.249	102.986	50.11	111.383	32.003	89.414	125.612	64.462	12.645	35.266	188.639	61.143	32.32	55.899	11.703	46.558	61.22	149.705	36.255	32.638	35.382	27.444	134.955	35.658	254.131	139.658	34.352	59.845	127.667	31.33	103.476	220.42	63.36	33	48.411	157.586	155.112	255	59.484	169.388	42.716	46.514	91.899	57.926
	10.2564	52.561	46.342	60.066	50.473	95.636	105.184	51.683	73.996	30.783	86.583	118.194	91.186	12.615	33.598	191.333	54.188	31.792	49.694	12.091	52.273	50.878	128.87	36.631	29.287	30.849	36.372	182.909	42.187	254.507	162.882	31.292	58.536	125	29.909	135.339	254.492	74.222	33	55.798	207.313	169.493	255	58.191	146.821	41.715	48.059	154.163	53.405
	10.5128	54.168	49.584	65.06	46.638	113.474	116.044	54.43	75.082	32.328	78.826	126.43	121.405	13.788	35.763	197.48	52.674	26.599	42.71	12.408	54.33	68.511	109.314	33.969	28.53	33.356	50.488	213.924	43.021	254	161.805	30.226	55.595	129.444	32.764	163.213	254.719	93.483	32	70.826	239.366	165.692	255	57.898	167.755	40.624	47.419	210.986	46.059
	10.7692	53.162	53.88	74.799	38.671	122.396	138.171	53.654	77.14	32.376	74.368	115.605	150.439	16.045	39.741	211.852	56.01	21.117	42.067	12.096	51.879	95.95	91.648	38.418	33.801	30.718	75.657	212.909	36.575	235.838	161.913	25.947	56.818	136.222	29.563	174.547	254.849	144.6	31	109.071	253.687	158.218	255	60.995	182.81	48.115	53.841	235.725	44.965
	11.0256	51.983	54.593	86.677	35.257	112.772	152.31	55.73	80.594	32.321	73.766	94.037	201.832	14.817	48.979	220.142	71.752	24.201	54.188	13.453	54.947	80.847	76.172	45.705	32.477	29.609	107.888	195.97	34.251	183.08	166.514	27.715	55.242	149.111	32.315	167.193	212.342	174.334	35	183.174	255	166.175	255	70.667	160.469	63.618	55.18	254.099	37.326
	11.2821	59.175	66.376	89.945	34.427	107.811	168.204	65.614	90.391	39.088	64.069	76.757	218.001	12.788	50.969	215.956	98.385	28.365	77.293	13.254	50.905	56.919	66.883	58.208	30.556	25.072	145.728	176.667	40.231	134.234	196.93	27.957	47.578	165.889	33.925	148.826	132.993	178.027	39	243.409	254.097	174.28	254.846	71.168	136.785	87.435	60.263	254	31.599
	11.5385	65.577	67.974	101.992	36.419	116.964	159.417	73.454	75.21	50.417	54.498	70.385	193.664	12.144	58.923	214.217	130.053	31.775	104.24	11.3	50.314	72.611	64.14	66.673	27.582	20.711	201.771	188.265	37.223	110.973	227.74	27.386	48.902	177.222	40.206	142	91.5	185.667	44	254.17	253.729	163.24	253.528	80.189	130.19	109.121	67.93	254.136	31.379
	11.7949	73.732	62.048	103.095	38.499	127.016	140.344	71.836	78.048	60.349	48.469	70.562	170.121	11.745	60.392	209	166.848	36.518	133.751	10.438	51.127	117.155	65.13	70.689	27.92	17.456	227.442	233.879	50.137	100.623	248.524	26.027	45.28	183.556	53.45	140.91	73.656	190.291	40	229.833	255	142.135	236.852	106.832	128.519	126.162	74.436	254.428	28.661
	12.0513	84.929	69.536	98.665	47.444	104.141	123.632	75.876	76.44	68.441	42.215	68.361	164.134	13.982	60.017	193.359	219.332	40.767	145.086	11.721	53.37	160.843	65.208	53.636	31.865	12.409	219.888	214.977	60.289	98.574	255	32.22	51.16	182.667	61.559	136.469	60.151	165.067	43	178.15	255	124.792	221.486	138.289	120.787	158.021	84.902	254.72	34.291
	12.3077	97.568	72.726	95.534	40.047	93.402	121.153	77.341	66.436	79.295	41.667	58.036	170.133	14.018	48.793	175.969	208.667	41.232	125.891	12.239	59.313	189.193	61.974	54.572	41.622	12.487	210.241	146.515	67.262	97.933	255	43.262	48.505	183.556	80.892	125.448	54.281	128.6	36	141.999	250.002	131.817	177.023	163.415	107.776	179.842	85.712	255	43.673
	12.5641	112.967	72.117	89.568	30.622	108.94	124.717	77.247	62.978	99.21	39.641	53.18	173.687	13.436	47.568	163.059	178.71	48.426	97.329	11.667	72.909	217.762	61.997	70.23	54.882	13.153	204.423	85.636	77.799	97.757	254.979	69.123	43.714	177.444	114.829	100.886	46.99	79.061	38	116.141	225.08	160.462	142.589	169.67	89.889	204.141	77.492	240.932	56.425
	12.8205	125.93	79.712	85.317	24.807	109.149	136.32	77.217	75.947	136.112	41.816	53.154	164.652	10.224	56.538	173.302	160.991	53.143	93.793	11.249	96.176	241.75	63.874	98.507	78.362	15.706	211.74	62.576	84.856	92.882	254.249	149.561	41.383	165.222	151.299	75.185	42.837	44.5	33	83.711	190.564	181.651	121.527	167.104	85.571	226.393	72.727	206.748	82.509
	13.0769	136.132	86.179	87.707	21.799	111.511	169.373	77.571	94.704	162.55	46.624	47.132	158.934	11.368	55.866	180.794	162.012	54.759	101.417	10.667	130.231	254	63.121	144.185	122.725	14.292	215.766	52.697	68.833	90.24	239.287	195.986	43	157.889	173.487	58.99	39.596	23.667	39	59.59	158.317	209.633	105.827	176.663	86.844	242.25	80.927	177.25	104.056
	13.3333	137.401	99.741	93.961	23.187	118.705	183.526	88.395	110.864	180.791	42.125	41.559	147.75	13.015	48.833	163.474	174.062	51.172	81.969	9.715	171.844	243.08	62.006	170.221	171.851	13.556	204.885	43.091	47.872	91.986	154.573	217.94	43.022	148.889	185.411	49.9	34.036	15.773	45	44.523	140.566	226.113	94.204	202.061	84.417	251.303	99.004	172.087	140.606
	13.5897	130.365	102.792	101.379	29.967	141.375	210.324	85.946	128.914	171.458	39.87	48.977	143.25	12.392	48.971	151.058	172.061	47.915	74.854	9.945	206.34	239.301	59.33	187.111	214.504	13.89	179	39.773	24.268	89.598	64.003	226.982	41.478	144	193.165	47.024	32.189	16.607	47	37.773	113.81	246.352	81.87	243.988	93.043	254.685	125.65	167.429	173.515
	13.8462	122.841	96.154	112.479	35.676	181.438	216.055	82.939	144.148	155.657	31.118	57.382	153.836	10.767	54.286	152.981	161.751	56.933	73.429	11.405	219.35	253.093	57.111	183.606	250.328	10.189	153.454	30.515	20.626	86.039	33.213	221.826	34.633	132.556	196.416	35.554	32.356	13.06	43	33.88	92.789	254.196	74.964	253.688	109.878	255	159.208	155.102	217.649
	14.1026	123.22	98.097	123.512	46.187	221.505	249.121	86.914	139.46	135.195	30.523	59.825	158.672	10.758	63.006	145.674	154.204	52.34	68.222	9.607	214.551	241.109	44.586	164.143	238.333	10.947	132.603	24.25	31.923	83.87	23.955	194.502	32.207	112.667	182.668	28.233	31.026	15	43	28.892	66.217	254.035	69.866	255	126.907	255	195.63	142.592	244.075
	14.359	130.265	106.074	137.027	74.316	239.005	226.166	108.121	106.971	109.889	29.5	61.753	143.668	9.13	81.597	138.145	142.583	50.267	70.688	9	192.485	184.447	30.752	141.252	175.087	12.739	117.719	24.697	27.711	76.478	24.724	147.779	30.934	97	156.199	17.997	30.198	12.013	49	27.242	50.001	247.285	67.719	255	126.571	255	222.433	146.391	254.459
	14.6154	141.902	119.761	155.781	105.874	217.602	130.913	148.826	73.737	95.993	30.64	61.264	135.34	9	75.348	141.845	144.591	55.565	73.667	9.894	165.55	105.878	19.944	118.654	106.127	12.682	103.813	25.144	24.419	72.877	27.297	102.754	28.757	84.333	115.431	12.39	36.809	9.853	60	27.7	43.147	230.178	61.707	254.653	137.653	255	234.213	149.253	254.59
	14.8718	145.139	138.131	171.86	130.594	207.765	62.378	209.831	95.354	91.299	32.823	59.472	130.873		63.71	131.655	157.098	55.933	75.942	11.964	161.28	69.395	14.853	96.71	59.576	12.778	101.996	26.242	30.517	74.283	28.882	75.305	32.325	79.556	84.504	13.258	47.313	13.031	69	22.43	44.27	185.678	59.836	242.477	141.698	255	231.955	147.56	255
	15.1282	124.158	163.538	177.673	137.751	157.187	31.685	254.065	92.979	85.606	31.093	60.819	139.529		61.719	112.977	153.536	54.766	71.865	11.881	149.08	58.134	12.133	97.62	42.303	13.849	88.162	27.682	37.628	71.704	36.078	58.254	31.874	73.222	65.449	15.509	50.419	11.84	97	17.807	50.995	131.707	69.06	220.955	119.585	254.956	224.582	138.961	255
	15.3846	122.609	192.496	175.179	144.635	54.551	17.923	240.427	85.523	93.519	28.611	57.426	142.894		55.635	102.722	139.318	54.777	70.68	10.368	128.441	51.164	9.737	97.054	35.914	11.911	80.763	29.667	62.661	69.763	40.19	41.137	30.044	66.667	52.615	11.381	41.474	12.333	133	19.76	50.326	93.957	64.217	197.916	95.272	254.333	226.797	107.837	255
	15.641	129.979	229.214	170.396	138.495	29.993	12.121	207.465	117.494	81.212	31.349	54.806	139.137		52.382	92.01	133.439	48.607	77.086	11.605	102.318	48.552	10.837	95.575	28.05	10.153	85.653	33.598	63.839	68.358	50.502	27.894	23.809	60.667	45.82	10.803	30.436	12.098	149	19.491	41.097	73.022	59.044	203.747	65.005	245.234	233	89.119	255
	15.8974	133.252	254.177	144.997	133.303	24.372	9.864	195.466	143.313	74.585	32.205	58.966	120.657		55.047	90.19	133.598	47.254	77.316	12.905	74.613	45.719	9.248	98.842	27.085	10.544	93.388	32.424	69.185	64.574	53.721	21.068	29.01	57.222	38.779	10.912	22.116	13.333	198	16.256	33.761	71.714	51.781	210.308	56.075	231.034	251.957	78.029	255
	16.1538	131.077	255	113.526	126.202	19.271	9.215	185.333	105.963	78.555	27.095	59.848	100.36		47.63	93.711	140.351	56.956	67.759	12.274	59.061	54.688	9.4	96.285	24.11	11.184	88.4	29.121	95.515	57.422	59.112	16.447	35.69	53.444	33.103	11.8	15.47	13.83	179	15.746	29.01	52.581	47.293	203.921	61.952	201.686	254.808	86.51	255
	16.4103	135.609	255	91.315	114.015	16.44	12.431	157.622	72.794	74.571	25.333	58.499	79.766		52.766	97.187	147	64.726	59.619	11.494	47.758	67.999	11.397	86.914	29.322	10.739	79.672	26.727	94.422	51.092	58.404	14.064	41.747	48.778	32.034	15.009	13.393	11.249	93	14.728	23.981	47.099	53.682	172.176	68.429	174.664	244.27	91.348	255
	16.6667	136.624	255	79.525	103.067	15.058	9.26	125.012	58.819	74.703	26.016	59.334	78.919		56.883	99.643	133.771	76.903	51.061	12.065	37.709	74.476	10.714	82.232	30.426	13.636	69.041	18.053	135.834	49.68	63.134	12.668	49.509	46.333	27.194	15.18	13.438	11.833	65	13.283	23.254	52.279	51.127	148.543	68.247	156.947	222.762	107.782	255
	16.9231	135.514	253.684	72.748	99.235	20.626	11.269	97.423	45.444	76.773	23.99	61.682	86.419		60.842	92.899	110.087	85.689	49.516	10.128	32.664	53.484	12.568	80.37	30.444	13.851	56.125	11	177.689	48.498	75.075	9.557	42.385	41.333	20.779	14.166	11.798	12.873	70	12.834	24.043	59.064	49.773	127.043	61.653	142.4	204.632	87.766	255
	17.1795	134.206	247.046	64.712	104.5	25.236	19.619	67.261	47.267	91.444	30.458	65.017	71.142		64.993	86.671	91.764	89.328	44.184	11.778	30.06	31.178	11.645	71.693	33.766	13.816	48.27	14.432	192.268	50.241	86.008	10.584	23.78	38.667	17.788	14.028	11.633	15.314	74	11.106	25.019	68.709	54.872	116.868	61.526	134.234	179.968	72.282	255
	17.4359	124.721	243.969	66.923	115.926	15.957	31.247	49.727	49.58	101.992	34.528	65.994	61.253		60.645	91.284	79.865	73.412	41.766		26.887	26.925	11.013	66.347	33.017	10.948	41.121	14.273	183.805	57.285	89.415	11.72	13.333	37.444	17.057	14.142	15.047	12.52	59	10.74	22.747	73.191	65.3	120.99	54.134	128.076	160.708	78.348	255
	17.6923	120.589	249.376	68.902	111.447	12.092	46.041	37.641	59.893	99.169	33.165	64.814	55.869		55.678	115.167	83.061	88.413	45.469		25.102	28.482	11.994	58.963	29.629	9.757	38.609	13.5	204.339	65.227	76.179	11.739	10.705	39.111	18.211	13.282	14.633	12.58	56	11.081	20.749	69.852	66.333	119.605	53.027	111.844	152.541	80.061	255
	17.9487	102.618	255	64.113	105.685	14.37	38.561	46.311	56.258	86.583	23.406	65.028	50.831		48.198	149.183	83.812	84.35	51.676		26.121	32.19	12.661	52.823	28.11	11.33	34.165	12.303	219.652	66.074	52.637	9.069	11.701	39.556	12.197	12.704	15.043	14.778	57	12.704	23.397	66.416	62.609	108.758	62.333	100.751	146.65	65.939	254.361
	18.2051	94.206	253.584	55.667	102.646	12.672	20.853	53.922	51.918	81.991	19.49	60.488	47.599		59.016	158.523	68.878	73.31	59.515		25.806	33.333	9.333	49.141	26.849	10.592	29.251	12.652	231.439	65.224	49.263	10.284	13.781	35.556	10.426	13.565	14.225	15.79	58	13.578	20.428	63.61	61.787	91.088	80.317	91.036	136.919	59.841	253.543
	18.4615	93.331	239.59	45.134	101.966	15.027	10.569	46.492	51.383	76.581	23.333	52.736	34.456		56.842	169.9	61.604	59.102	44.962		26.957	33.787		46.212	27.277	9.495	27.095	11.515	213.418	63.544	72.133	10.693	11.014	33.333	11.345	14.297	13.94	14.773	49	12.955	22.341	52.21	65.014	78.088	78.041	82.155	130.451	67.342	254.846
	18.7179	95.103	197.433	40.093	104.086	12.002	10.307	41.695	50.014	72.613	21.789	51.899	23.899		54.061	165.174	55.219	39.926	25.179		21.913	38.68		45.381	18.747	9.339	26.968	13.129	190.731	65.404	83.495	13.31	11.455	25	12.149	14.682	14.486	15.884	53	12.419	21.751	42.933	67.955	67.89	81.95	71.457	130.419	87.449	253.958
	18.9744	98.063	156.783	34.397	101.939	13.63	12.607	41.726	63.786	69.249	21.122	58.579	15.761		62.915	149.238	48.018	27.404	14.994		21.515	41.921		49.14	15	9.928	33.604	10.364	188.008	62.091	78.533	13.438	10.629	23	15.745	13.921	12.769	15.073	41	12.048	19.413	37.261	58.396	63.371	89.85	69.909	125.994	95.368	253.137
	19.2308	102.959	141.427	30.887	92.503	10.898	14.043	43.938	54.309	57.095	18.064	60.171	11.972		74.44	133.77	40.878	43.718	13.424		22.892	40.486		51.279	14.365	8.58	39.215	12	152.327	53.515	84.236	14.934	11.805	20.333	14.388	12.905	11.691	13.25	40	11.257	16.224	39.982	47.293	62.707	88.224	72.727	126.454	93.055	226.389
	19.4872	101.249	140.618	33.435	86.835	14.575	13.467	46.369	46.646	44.527	16.208	59.805	13.219		81.648	115.793	27.375	60.521	13.088		28.132	43.676		48.518	12.344	9.779	39.687	12.121	91.178	48.783	80.358	17.102	14.597	20.111	10.025	13.513	13.832	11.338	40	10.428	17.401	51.492	45.387	61.959	79.825	68.806	126.529	88.333	191.392
	19.7436	83.757	124.103	39.76	86.808	13.825	15.109	46.471	44.984	41.056	18.801	61.29	12.244		83.905	99.36	18.019	58.319	13.147		30	44.538		47.158	11.222	11.559	36.284	11.833	48.304	46.428	74.317	22.842	13.591	19.889	9.346	11.671	14.31	11.093	46	10.466	15.233	61.694	53.617	66.031	73.81	64.689	125.197	89.392	165.938
	20	74.593	89.778	56.053	88.03	13.527	13.312	39.425	49.971	41.314	18.983	58.527	11.461		87.609	98.456	13.193	44.125	15.077			36.638		47.895	11.321	11.79	35.148	11.333	32.558	47.021	62.506	25.392	11.226	19.778	11.009	10.36	13.034	13.773	40	11.502	11.62	60.644	52.106	68.182	70.109	62.152	113.459	83.13	150.946
	20.2564	69.695	65.749	67.454	88.989	12.771	14.031	34.837	53.326	40.757	18.784	57.921	13.87		87.685	99.278	12.799	42.168	15.197			38.011		46.897	13.314	11.479	31.494	9.644	29.501	50.547	49.438	17.281	10.56	19.444	11.041	13.051	13.198	14.299	42	13.353	8.703	53.226	54.657	65.621	68.086	65.874	112.153	66.585	134.016
	20.5128	68.5	58.228	58.916	75.46	14.406	12.07	37.854	61.502	42.3	24.778	63.86	15		104.343	133.819	14.583	38.029	11.449			35.762		44.111	14.845	11.805	31.573	9.182	26.183	46.506	37.435	16.306	11.46	21.222	14.034	11.09	14.605	12.333	34	14.135	6.421	42.576	55.676	64.701	59.367	67.331	108.967	60.132	118.371
	20.7692	64.331	63.154	45.555	63.632	14.085	11.59	39.85	69.667	46.995	27.859	67.638	15.351		134.891	112.708	11.239	69.45	10.001			33.623		39.948	13.391	12.911	28.139	11.864	25.854	41.723	33.836	12.472	13.907	23.111	14.399	13.474	14.873		42	12.133	7.216	42.279	49.113	60.614	58.714	65.73	106.452	57.419	107.735
	21.0256	59.546	78.402	36.775	60.182	14.311	11.673	42.1	73.907	49.629	27	65.152	11.262		157.505	93.335	12.992	111.356	11.627			35.189		41.486	9.738	13.007	28.648	12	24.601	43.166	33.33	11.85	11.172	25.444	11.224	14.412	11.617		51	11	8.901	35.507	47.233	60.173	59.701	62.339	107.616	62.873	90.683
	21.2821	55.262	76.852	33.866	58.072	13.783	10.59	41.356	75.971	49.322	23.473	62.603	10.822		158.582	92.392	13.962	169.967	10.604			34.072		42.338	10.879	13.53	26.846	10.061	25.049	43.572	41.78	14.002	12.938	26.444	13.673	15.087	11.843		49	11.174	10.026	30.584	47.553	57.792	57.247	61.619	110.44	67.527	76.4
	21.5385	53.502	53.65	34.273	54.984	15.56	12.709	50.63	67.337	52.87	21.236	52.276	13.125		182.457	89.385	15	221.944	13.231			32.89		40.982	10.994	10.193	25.813	9	25.738	39.768	44.899	13.163	13.284	31.889	12.642	11.227	14.723		40	11.727	5.323	32.263	53.896	56.209	58.143	60.315	102.604	67.434	71.216
	21.7949	55.592	42.031	34.925	57.202	12.75	10.853	55.822	54	43.997	18.615	38.066	14.124		245.761	83.629	14.128	244.171	12.691			37.309		43.333	13.22	12.037	24.999	9.341	27.771	37.46	47.898	13.756	11.444	33.222	10.816	12.646	13.31		45	13.955	7.812	43.393	60.883	50.333	60.311	63.582	90.74	75.513	59
	22.0513	48.858	38.51	31.264	53.64	13.427	11.246	52.295	37.531	32.802	18.799	25.593	11.994		245.233	91.727	13.379	254.307	12.983			37.752		41.284	11.552	13.471	25.167	12.333	32.993	41.232	46.478	13	10.852	30.333	11.892	12.803	14.504		53	16.311	10.576	56.789	53.471	41.667	58.567	65.271	85.397	81.981	51.955
	22.3077	42.579	40.47	26.763	50.999	16.513	11.582	41.617	38.008	28.848	18.573	14.643	13.61		178.877	85.907	13.112	254.99	14.015			33.652		35.909	12.123	13.778	27.413	14.28	36.66	36.509	42.067	11.876	10.693	25.222	15.127	13.17	15.241		49	13.684	10.893	62.938	48.847	35.509	63.673	62.509	84.207	75.775	45.2
	22.5641	44.621	48.994	24.42	46.837	15.865	16.096	34.241	36.781	17.566	21.5	11.414	10.038		138.726	82.785	14.25	251.352	12.947			33.754		34.55	10.667		28.89	12	37.742	32.922	25.376	11.279	13.384	16	11.108	14.358	12.996		44	11.985	13.779	55.156	43.945	31.536	64.463	61.224	76.122	72.538	37.405
	22.8205	40.006	40.718	28.67	46.072	13.498	15.485	30.112	44.934	12.75	30.898	11.249	9.639		126.398	88.878	13.638	253.019	14.675			29.915		31.762			26.464		38.864	31.369	16.693	9.797	13.161	12.111	10.889	11.59	11.333		47	14.667	18.949	49.64	41.376	35.474	68.132	61.441	65.387	72.82	35.513
	23.0769	38.975	35.282	42.056	36.675	13.501	11.247	31.415	40.185	9.579	31.719	10.478	12.022		126.829	90.267	11.697	254.002	14.761			31.324		27.377			25.708		37.809	30.778	12.927	11.669	14.179	10.889		14.429			40		21.045	38.747	42.204	40.959	78.653	59.727	68.909	69.054	33.457
	23.3333	42.281	36.407	55.549	38.602	15.333	14.043	23.542	35.864	9.141	37.995	11.849	9.642		146.284	95.41	10.028	252.911	14.592			36.083		24.977			24.543		36.557	33.354	10.405	12.552	10.897	10.778		13.739			48		26.548	34.411	41.565	39.369	84.937	66.356	76.01	69.182	28.668
	23.5897	42.254	28.476	59.079	43.327	12.165	13.584	18.91	31	8.279	41.069	12.239	11.226		147.902	86.222	12.078	251.584	12.96			36.706		23.831			27.545		28.853	37.666	11.336	16.138	9.698	10.778		12.461			41		29.578	34.072	40.444	39.659	76.206	67.052	54.771	73.817	27.665
	23.8462	35.579	26.205	47.618	45.914	10.489	13.773	14.412	29.642	11.379	40.37	11.667	10.443		126.795	86.026	11.219	254.594	13.056			36.54		23.455			23.099		28.462	35.966	13.378	12.617	11.828	10.667		13.408			33		30.623	32.799	43.569	47.24	65.449	64.253	40.018	81.102	26.831
	24.1026	32.913	24.268	30.758	60.111	12.127	13.538	13.018	34.877	8.5	28.99	11.475	10.872		102.928	92.265	9.977	221.565	14.535			40.79		25.469			29.302		31.733	35.927	11.499	12.002	12.194	11.444		11.111			32		28.148	32.792	45.896	54.884	60.66	70.616	26.902	82.242	28.015
	24.359	34.029	25	20.817	70.012	17.872	14.413	15.918	35.543	7.757	12.89	11.14	8.799		82.605	83.394	8.224	171.298	15.179			41.157		26.128			31.607		36.101	36.981	10.141	11.042	11.238	12.444		12.503			35		25.651	31.74	47.36	53.987	62.243	65.819	17.262	73.655	28.601
	24.6154	32.991	23.359	16.273	73.749	23.12	14.73	14.225	35.292	8.944	10.222	10.031	8.932		76.173	75.622	8	139.261	13.818			39.728		19.716			26.769		33.079	32.072	11	10.918	10.405	13.222		13.4			30			29.071	43.496	53.969	69.463	60.035	16.194	64.593	25.287
	24.8718	37.474	20.658	18.481	70.008	21.347	15.368	12.02	46.929	12.75	10.958	11.475	12.036		72.892	67.728	7.884	114.289	11.012			50.259		15.018			23.88		32.749	27.903	11	11.85	11.068	11.111		14.467			36			33.692	41.282	48.671	70.186	53.146	16.675	61.769	25.438
	25.1282	38.519	23.883	19.207	62.699	20.072	13.771	14.104	53.337	10.448	11.431	12.609	11.782		76.737	66.171	8.335	102.006	12.078			51.553		13.184			25.47		28.784	25.542	12.963	12.331	14.495	10.778		15.693			28			36.63	36.425	44.366	62.889	49.766	16.358	65.516	27.725
	25.3846	34.883	20.154	15.742	51.262	17.48	10.569	12.113	76.852	10.151	10.257	12.137	9.45		90.8	78.568	11.958	85.336	10.48			37.742		12.131			28.59		27.928	28.204	11.354	14.662	14.751	12		12.971			28			36.477	37.388	39.057	50.49	50.12	12.6	67.332	21.745
	25.641	32.398	16.006	13.304	42.328	17.809	12.946	13.608	79.868	7.458	9.167	12	10.33		104.742	83.21	9.703	83.798	14.249			30.75		11.952			34.333		30.97	32.817	10.688		12.965	11.333		13.704			32			38.917	33.752	37.229	44.592	53.405	11.124	66.123	21.908
	25.8974	28.969	10.712	13.005	38.743	24.193	10.016	15.022	82.527	8.217	12.277	11.604	11.497		124.643	73.762	11.646	71.643	14.7			27.453		11.166			36.275		28.712	34.23	11.935		13.228	12.556		13.761			26			35.81	31.981	35.703	43.222	57.87	10.45	61.979	21.823
	26.1538	28.689	11.162	10.647	33.634	23.46	14.557	15.117	57.798	9.646	9.962	12.527	8.843		106.645	68.403	9.044	62.886	15.442			28.356		10.8			37.364		29.28	32.941	10.853		13.333	13.889		10.85			26			32.152	32.435	36.973	40	58.872	13.198	54.422	20
	26.4103	28.068	14	11.751	34.342	23.597	11.685	15.841	26.446	8.213	13.354	11.535	10.322		89.791	69.719	10.611	61.7	14.164			30.623		11.908			36.946		30.621	28.321	8.512			11.444		13.369			35			23.34	33.478	38.396	38.15	51.69	15.574	51.324	19.836
	26.6667	31.34	12.815	11.64	33.838	24.351	9.985	14.223	12.226	11.532	11.972	12.541	9.648		93.275	70.819	11.604	66.81	13.09			30.639		13.016			33.728		31.984	28.777	9.488			12.111		14.19			33			25.212	36.599	42.497	39.209	45.631	14.847	52.552	19.348
	26.9231	26.327	11.197	14.218	35.165	32.889	9	15.543	12.325	10.419	11.916	12.186	9.31		102.531	71.409	10.885	72.638	16.281			32.158		14.043			35.093		32.156	31.077	12.26			15.556		11.333			36			28.154	41.985	44.379	33.143	47.121	13.862	45.876	21.261
	27.1795	28.812	13.094	11.852	36.198		12.013	15.967	10.793	9.698	12.99	11.81	9.172		109.953	69.762	13.312	83.902	17.588			29.882		14			28.311		38.886	32.159	12.551			21.667					31			31.002	44.706	44.05	28.465	44.946	13.222	43.083	22.28
	27.4359	28.081	12.219	14.904	31.478		11.73	11.767	9.473	10.152	13.208	13.35	11.667		118.9	66.323	12.218	82.643	15.891			36.127		13.392			22.235		33.659	29.034	8.748			29.333					34			25.081	49.338	42.452	28.533	42.475	11.489	41.734	24.424
	27.6923	29.59	13.154	16.285	31.372		10.416	14.122	10.444	10.55	13.444	13.388			138.1	70.556	12.984	87.709	12.194			37.048		11.402			20.454		32.748	23.989	8.999			30.444					27			21.168	52.101	36.802	25.395	36.282	12.065	34.61	28.05
	27.9487	30.224	9.311	12.84	38.62		12.889	11.895	12.266	9.61	12.982	11.77			156.501	74.274	13.39	87.898	12.412			42.465		10.35			21.723		34.013	33.165	10.601			31					29			21.284	60.272	35.728	27.478	31.497	12.573	34.734	35.243
	28.2051	35.738	10.94	12.193	39.875			12.267	12.601	9.979	9.094	12.853			165.155	78.655	12.008	84.069	16			44.801		11.473			25.448		33.372	36.035	10.841			30.222					29			18.358	65.128	30.216	29.079	31.704	10.683	35.787	36.623
	28.4615	41.762	11.735	15.538	39.223			13.821	11.605	10.056	12.611	13.587			153.766	75.46	10.422	76.588				51.264		10.662			26.999		28.914	30.66	9.837			28.444					31			18.767	59.287	23.631	26.347	34.419	12.432	33.35	36.97
	28.7179	34.244	10.595	10.955	41.878			12.957	13.128	9.918	11.833	13.956			143.988	80.45	12.5	81.404				53		8.758			27.469		30.065	28.962	12.566			22.556					32			18.713	49.531	20.268	25.159	35.941	11.209	34.809	28.675
	28.9744	29.4	13.678	9.624	45.142			10	10.132	10.233	14.69	12.666			138.856	93.677	14.05	80.616				47.017		8.707			29.814		32.09	30.521	12.254			16.333					30			22.502	34.402	21.285	24.839	42.22	12.888	36.128	26.438
	29.2308	31.021	13	11.362	44.359			11.344	12.576	9.225	14.757	14.178			128.167	89.873	11.406	74.375				26.692		10.101			26.556		37.108	25.358	12.805			16.222					29				25.469	17.74	23.952	45.792	12.721	30.151	26.886
	29.4872	32.038	11.362	10.515	46.684			13.558	13.822	10.59	11.13	15.457			96.433	85.333	11.86	70.56				15.609		11.052			25.033		29.191	28.822	12.418			16.889					25				20.37	15.42	22.635	40.743	12.045	31.627	26.128
	29.7436	27.748	10.313	10.849	49.331			12.797	13.786	11.585	11.319	14.7			89.243	88.25	11.458	77.95				12.747		12.68			21.15		28.495		10.753			13.222					23				16.145	14.103	19.986	35.587	10.355	31.898	23.171
	30	26.925	13.333	10.465	49.347			12.776	12.914	12.578	11.275	12.426			103.06	87.626	12.174	79.968				11.13		12.439			24		26.383		10.454			12.778					19				15.833	17.046	18.537	35.861	9.856	26.592	18.693
	X	WT
	0	35	35.778	20.778	35	146.667	24.778	42	39	74	80.333	23	31.778	125.111	47	52.333	29.444	28.333	92.111	34.667	93	32.4444	81.333	65	88.333	66.111	55	54	59.667	99.667	32.667	19	45	62	104	57	58.333	95.667	84	70.444	163.778
	0.2564	55.802	37.073	17.864	41.776	146.68	33.983	53.106	38.236	82.555	103.956	22.739	27.289	116.629	63.35	70.359	29.65	37.899	99.24	49.728	103.406	32.8101	94.095	58.517	85.608	61.302	90.256	37.555	65.361	80.74	36.688	20.877	38.9386	73.21	108.756	47.8325	52.084	94.491	71.657	64.591	162.86
	0.5128	54.391	43.012	17.222	48.225	115.612	40.777	59.673	38.589	84.375	122.778	21.84	31.373	105.912	43.403	74.32	38.639	48.211	99.508	59.71	112.599	34.5793	103.175	47.547	86.55	61.997	57.714	54.901	62.703	82.357	43.569	25.037	36.8481	87.815	128.722	59.5973	55.563	104.561	72.911	62.93	153.486
	0.7692	47.462	47.537	22.662	68.051	98.568	47.02	52.669	34.903	71.388	103.374	37.757	35.481	107.253	36.423	79.379	41.564	40.131	102.548	65.597	95.233	37.1176	102.619	43.072	80.619	67.505	28.01	44.791	71.471	79.105	47.637	28.766	39.3847	91.144	122.545	61.3558	62.643	119.71	71.147	73.029	143.2
	1.0256	44.758	46.958	30.606	74.236	85.79	48.57	43.812	35.43	56.389	94.623	47.189	37.55	109.966	31.877	79.8	37.07	27.494	106.955	62.243	78.562	39.6776	88.873	46.851	79.894	77.157	34.695	46.331	81.818	78.857	45.852	36.047	41.7032	82.689	88.982	55.0187	70.305	141.082	68.936	91.054	130.866
	1.2821	46.43	48.668	32.217	73.658	49.814	54.828	39.211	43.241	57.654	86.196	42.443	52.306	105.204	36.651	87.424	36.572	24.061	111.697	54.12	68.288	42.1501	75.349	51.604	84.243	85.549	53.054	69.041	85.234	77.42	53.429	39.364	47.475	76.53	61.976	49.1204	81.041	151.517	75.312	98.569	117.643
	1.5385	54.746	55.357	28.758	77.62	40.242	62.286	43.147	49.018	60.969	74.241	35.412	64.813	93.401	42.44	88.735	33.255	21.939	117.63	56.971	58.606	45.891	69.143	53.485	87.762	74.398	49.065	77.899	100.868	80.024	42.906	36.631	58.7874	60.584	49.835	46.8917	85.399	139.389	79.998	84.273	103.676
	1.7949	61.211	63	24.116	71.432	53.676	78.738	44.989	44.36	67.733	78.275	31.563	40.859	79.167	43.827	81.376	32.373	23.71	119.817	55.04	48.782	49.0273	75.556	50.488	81.963	71.772	33.096	65.664	105.673	94	47.479	35.088	62.1166	55.655	40.855	50.0368	82.071	125.628	76.078	74.668	95.292
	2.0513	60.666	55.242	28.162	83.287	61.192	103.863	45.071	35.834	74	87.939	26.309	40.6	75.578	45.101	67.354	32.655	28.12	109.324	52.567	46.928	51.2592	89.159	51.923	70.603	77.215	20.689	68.947	112.396	62.306	42.285	35.43	59.8471	59.674	32.196	46.8305	73.768	116.047	78.256	72.094	100.78
	2.3077	48.402	62.063	47.101	80.646	90.403	91.754	51.252	33.651	98.932	74.457	33.628	46.899	81.373	48.097	58.664	31.805	24.576	98.427	42.162	55.516	57.8154	110	57.645	64.889	85.959	19.195	75.819	119.643	52.673	42.505	32.133	36.7845	59.132	28.393	45.4986	68.377	127.308	87.446	78.017	89.688
	2.5641	44.053	60.608	63.899	70.302	129.959	57.985	70.819	29.935	118.562	66.908	42.895	46.265	90.333	43.206	56.675	41.598	22.13	97.077	37.215	71.36	71.7126	137.46	75.75	65.831	82.368	22.98	77.884	122.318	58.058	38.862	34.638	38.0144	53.471	30.643	42.9781	65.257	118.51	97.015	85.083	83.743
	2.8205	43.776	55.265	52.944	61.804	149.331	42.452	84.393	29.3	115.208	68.152	50.413	53.66	100.514	32.596	56.597	47.575	22.963	100.909	36.568	83.847	77.8891	160.095	83.889	72.143	75.439	27.921	73.805	126.795	64.566	55.824	36.045	30.5301	57.791	38.313	44.7068	63.26	106.06	113.18	85.896	88.585
	3.0769	45.982	50.599	43.909	60.433	139.212	33.191	90.703	30.063	105.333	76.03	55.972	55.023	100.871	33.84	58.373	42.619	23.182	109.086	38.397	86.432	75.9001	162.619	89.601	64.571	71.888	38.005	90.912	125.187	52.66	69.057	36.926	27.4719	61.167	43.54	42.1407	54.325	89.299	123.09	73.895	89.873
	3.3333	47.833	47.182	41.167	71.24	144.849	42.247	85.543	33.036	103.809	81.387	49.469	44.677	92.537	37.524	67.802	42.126	23.662	115.647	43.324	80.467	69.0803	143.762	121.195	54.72	77.335	50.442	121.975	124	39.366	61.619	42.758	34.103	65.427	47.297	43.7469	47.926	72.277	127.727	61.427	89.705
	3.5897	44.584	39.457	59.04	90.806	126.533	47.059	83.681	33.179	114.646	88.693	42.447	44.03	93	41.911	80.114	49.724	30.762	111.553	37.257	82.91	64.5545	108.444	158.133	49.963	80.8	70.062	152.523	146.124	34.167	56.406	55.937	43.6689	57.959	52.784	39.2558	43.405	64.192	130.316	70.073	89.589
	3.8462	42.553	34.158	79.131	121.458	82.965	38.028	94.373	35.48	142.599	94.971	43.921	45.723	102.085	36	67.297	45.898	30.879	103.324	40.952	76.16	70.3333	89	155.479	48.317	83.83	91.989	155.372	163.662	32.573	58.142	62.006	55.289	60.221	58.589	30.5306	39.633	71.303	129.134	64.801	82.602
	4.1026	42.91	34.119	65.111	137.566	67.445	49.545	104.049	34.557	167.889	97.146	44.568	40.33	133.701	37.369	57.535	54.613	30.63	106.07	39.846	73.184	69.7243	85.349	160.939	49.804	103.143	122.346	143.29	154.429	37.068	61.197	61.046	68.673	54.002	58.145	26.7753	43.277	76.843	121.495	62.649	90.005
	4.359	50.799	36.523	53.278	146.735	63.638	57.734	113.796	29.765	143.576	108.55	29.654	41.082	178.969	33.116	62.458	52.019	28.327	107.7	40.23	76.521	61.7461	90.016	141.992	43.672	115.804	144.744	151.497	139.841	46.105	66.145	70.519	82.8332	58.604	62.306	28.9523	49.184	85.376	119.755	49.553	96.181
	4.6154	60.053	46.782	69.556	113.23	81.804	50.258	114.243	34.006	106.417	108.333	20.633	51.351	197.22	36.36	57.545	56.251	27.727	104.09	51.457	96.822	50.6719	84.286	129.76	48.063	118.329	137.137	154.335	119.285	43.323	69.447	78.326	79.1429	65.952	67.1	27.9501	51.437	89.142	116.9	42.402	91.421
	4.8718	59.129	53.573	76.247	96.991	88.606	52.605	103.68	56.714	90.835	92.67	23.942	51.044	175.48	49.299	51.038	58.261	56.626	104.339	54.809	115.148	47.1295	66.286	117.129	53.915	117.667	101.549	149.348	112.191	40.777	81.267	87.911	73.4361	66.231	68.676	25.3333	52.614	87.671	108.51	39.999	108.667
	5.1282	56.885	54.655	63.606	66.249	93.197	63.218	92.942	65.258	100.167	85.22	30.509	51.489	146.231	57.286	47.163	59.066	78.163	105.205	52.769	137.293	45.5691	61.794	95.582	50.286	116.806	73.654	121.013	97.015	40.272	81.008	101.397	76.9691	72.604	66.007	23.95	54.979	71.57	105.619	35.215	109.216
	5.3846	48.701	63.333	64.626	58.247	78.186	67.797	84.968	50.188	123.268	82.83	44.71	44.412	138.389	56.28	44.722	56.038	70.859	112.785	46.533	146.371	48.1733	66	85.267	56	103.782	54.235	109.098	98.617	42.5	104.034	112.468	72.7139	73.054	66.919	22.691	56.703	69.497	109.067	35.96	107.401
	5.641	46.66	66.218	65.222	45.917	82.261	85.699	77.879	41.432	109.194	87.137	55.988	43.997	137.442	57.907	35.473	53.78	48.605	125.58	33.373	159.113	47.2136	74.317	86	59.317	95.331	44.161	115.834	93.267	49.435	113.959	120.35	77.4648	66.89	64.788	24.4384	56.732	65.295	119.917	41.433	97.551
	5.8974	43.973	62.365	55.439	38.702	79.487	69.535	78.82	46.167	73.143	101.938	66.104	38.428	153.847	62.98	34.556	53.623	47.663	146.063	29.441	188.307	49.2871	101.556	89.435	41.212	86.778	39.038	118.999	88.264	53.175	126.964	122.975	70.842	67.968	64.825	25.0534	62.333	60.195	117.323	38.613	84.041
	6.1538	47.615	58.064	42.909	40.01	65.182	55.095	78.157	42.799	53.5	124.689	72.022	26.872	144.338	63.583	32.996	55.946	58.485	174.476	26.876	223.924	53.6793	105.714	100.278	32	79.867	33.794	123.594	92.686	50.361	133.955	122.482	66.802	67.564	74.593	24.526	67.222	58.454	111.276	43.064	74.922
	6.4103	50.977	47.695	44.808	46.667	58.766	63.894	79.636	45.181	50.979	139.068	67.067	23.453	147.898	60.127	32.566	61.7	51.782	185.298	29.795	232.887	52.3339	98.81	128.053	33.27	75.893	34.128	130.704	139.985	48.626	136.701	117.537	70.9569	66.694	90.44	28.5088	66.701	59.074	105.294	39.683	77.588
	6.6667	46.333	39.733	52.929	58.932	55.369	79.802	71.132	53.117	71.281	155.163	72.558	23.636	173.374	53.018	30.094	67.348	35.586	180.71	31.826	193.311	45.9849	83.73	125.599	42.476	75.915	38.259	129.17	154.465	37.109	135.381	114.58	82.3828	62.465	91.017	27.7759	69.339	63.248	108.865	40.311	88.462
	6.9231	37.808	38.807	60.657	72.332	52.052	88.673	74.144	67.795	109.826	166.889	83.843	18.825	210.472	46.914	34.549	73.106	29.121	171.257	34.333	115.174	46.2594	72.714	113.554	44.032	78.977	51.289	130.736	147.427	35.963	137.573	124.616	83.0285	62.513	81.116	24.7812	81.509	70.982	106.948	50.547	103.543
	7.1795	41.468	50.741	66.162	95.944	55.678	67.924	73.041	73.301	153.208	176.694	81.516	18.815	194.667	40.684	34.137	72.851	28.726	181.385	34.817	75.598	48.0671	63.444	105.16	41.704	76.68	61.322	155.967	146.997	32.333	140.499	138.879	75.8344	59.059	71.179	25.6045	77.141	80.67	106.953	57.894	108.381
	7.4359	45.328	60.473	63.758	133.759	60.037	90.878	66.579	78.819	189.958	168.507	63.095	22.54	146.833	32.762	39.075	87.444	33.541	191.09	35.749	67.458	55.4869	59.619	101.911	39.206	76.218	67.768	160.31	142.071	36.692	142.299	129.238	77.2936	56.511	60.581	30.2343	76.041	86.267	96.11	75.333	92.96
	7.6923	50.183	51.426	58.495	152.507	57.297	115.233	61.737	85.549	187.635	129.679	63.697	36.751	141.664	36.857	60.689	105.732	37.101	186.459	41.937	63.114	45.9112	57.19	113.57	36.333	73.131	77.656	112.037	104.988	35.095	143.849	100.846	88.5135	58.463	56.83	30.6627	79.574	92.296	97.161	64.61	79.245
	7.9487	43.899	63.095	59.515	139.801	54.771	101.631	59.083	81.783	130.529	121.644	72.615	48.868	142.554	28.599	70.091	128.439	43.46	174.145	50.37	62.44	44.9104	60.873	115.077	44.048	82.744	81.374	48.663	93.147	43.33	138.608	66.6	95.337	52.062	56.281	41.5545	76.945	91.837	104.506	47.945	93.617
	8.2051	44.156	89.856	65.737	112.546	47.768	100.942	70.506	70.168	81.667	122.691	88.016	59.305	169.129	30.927	54.964	133.302	44.401	148.811	46.186	59.769	44.7005	74.048	125.946	51.54	95.401	71.299	23.298	89.748	44.408	133.698	44.873	97.487	55.665	51.598	41.1077	71.456	85.829	98.339	50.036	112.096
	8.4615	49.021	135.558	77.833	107.115	48.272	116.657	81.448	58.848	64.096	122.241	99.051	53.392	177.322	43.463	50.259	143.734	42.333	134.945	57.914	58.842	47.7673	72.286	116.667	50.778	96.46	57.759	14.265	80.706	48.609	133.134	40.52	100.321	54.791	49.298	41.1139	60.263	83.188	109.699	75.914	110.9
	8.7179	54.302	183.422	97.465	112.598	55.13	114.588	94.989	48.148	55.073	112.559	103.822	59.63	218.129	44.149	67.617	149.846	41.15	139.665	48.705	60.078	54.1978	97.032	106.875	47.942	93.946	44.089	13.671	76.151	58.095	127.143	44.453	102.513	62.8	46.065	36.7756	58.461	88.902	117.892	107.675	106.451
	8.9744	58.978	97.84	117.939	107.671	70.059	125.853	92.136	36.087	49.273	101.835	99.808	83.68	247.667	52.778	61.689	120.401	35.051	145.012	42.358	63.66	56.2735	99.111	111.664	58.148	85.383	37.939	14.747	77.228	59.417	121.258	48.761	106.692	72.667	40.003	29.614	59.017	97.871	123.806	117.843	121.519
	9.2308	61.32	21.458	135.081	99.273	77.433	140.11	98.746	32.96	48.083	116.753	93.941	93.506	212.258	83.851	61.61	96.127	47.576	141.279	41.067	66.995	67.0481	93.429	117.537	74.889	84.196	35.468	14.275	86.796	52.442	117.025	49.832	105.749	72.448	40.133	24.2881	62.13	107.978	128.162	100.809	141.368
	9.4872	55.821	9.845	147.535	96.925	75.098	128.422	111.982	40.001	40.918	96.916	86.725	108.958	118.605	119.486	88.343	73.542	58.091	136.638	41.762	73.829	71.604	85.238	100.85	80.899	88.158	40.637	11.778	101.852	56.383	116.935	44.058	98.6667	60.838	43.127	21.3187	66.478	102.507	121.252	85.935	165.495
	9.7436	52.35	9.292	150.939	96.273	72.612	105.072	113.6	42.815	23.271	99.722	77.127	126.247	56.884	111.215	134.973	63.515	48.113	126.676	42.72	79.333	77.0014	99	84.125	71.026	93.333	66.094	9.821	127.472	52.769	123.51	40.917	88.3496	57.823	49.388	21.679	72.51	99.066	119.303	103.775	169.235
	10	59	9.882	150.606	98.582	70.623	86.667	93.027	41.358	12.583	121.108	72.587	160.372	32.291	96.491	199.338	63.333	39.697	124.32	48.47	76.667	83.5466	110.381	82.3	63.905	79.06	135.291	10.161	180.302	47.34	129.667	40.397	77.4979	53.409	66.126	23.0142	67.984	95.925	121.547	155.335	135.488
	10.2564	67.215	10.429	153.576	114.427	66.941	76.35	67.813	55.255	16.167	133.379	66.945	161.763	18.068	113.079	239.711	59.41	50.139	132.522	44.956	64.341	86.5928	120.651	74.301	60.122	79.19	183.565	9.069	231.703	42.143	133.686	45.163	64.6438	54.016	89.75	28.76	62.002	81.287	126.358	158.386	109.107
	10.5128	56.627	13.329	145.086	137.416	71.569	69.453	63.012	59.703	13.99	139.276	64.304	148.53	12.653	115.486	253.861	62.287	84.288	136.817	48.092	48.484	86.9894	125.905	71.475	58.402	82.271	206.594	10.181	254.92	41.114	136.76	49.57	53.1658	50.976	113.924	32.1192	55.311	76.61	120.503	112.348	105.48
	10.7692	55.065	11.037	129.859	147.358	73.203	68.057	81.593	56.45	12.188	139.667	65.802	107.019	11.444	78.44	242.28	72.055	90.636	127.703	52.4	36.892	85.3355	104	64.843	68.111	82.079	148.277	26.582	255	41.5	131.793	48.946	51.2883	47.857	132.354	44.8473	53.297	74.525	122.698	81.884	94.047
	11.0256	50.866	12.064	125.465	134.958	70.415	74.479	99.13	52.903	16.485	148.873	70.19	66.328	11	31.94	182.703	92.133	55.979	127.586	55.857	27.766	89.5843	61.984	55.45	88.72	72.514	84.229	39.391	255	44.201	126.958	50.819	65.692	51.92	130.847	50.4609	50.353	75.983	137.997	72.986	88.047
	11.2821	47.481	13.957	133.444	125.559	66.137	79.518	112.638	65.96	15.583	129.816	74.208	55.553	13.252	15.886	94.977	97.255	52.136	129.617	67.662	17.997	81.4911	50.095	32.37	119.931	64.889	45.807	22.185	255	40.224	128.46	50.855	87.0041	55.642	120.849	53.2473	47.652	80.549	161.776	34.681	87.338
	11.5385	42.979	13.027	116.48	116.293	55.421	93.828	113.613	59.606	11.055	145.543	70.135	55.032	13.407	11.429	33.951	104.222	68.333	127.761	79.19	14.406	67.7622	50.857	21.322	138.444	68.145	25.815	11.813	255	36.838	135.804	51.599	70.6818	54.218	124.237	51.072	45.773	76.78	162.647	13.92	85.982
	11.7949	33.623	10.07	84.899	97.38	53.803	136.419	101.822	49.416	11.361	147.85	61.071	51.714	11.449	10.323	17.778	110.419	90.801	128.289	125.619	11.487	58.9048	56	14.814	130.772	70.12	14.329	12.247	249.615	39.19	137.522	51.622	47.3246	48.372	137.179	51.9454	46.778	67.091	147.412	9.837	87.106
	12.0513	30.756	11.541	58.747	67.351	58.754	219.487	76.168	49.332	14.031	139.228	60.541	29.37	10.939	12.697	13.348	115.8	112.469	124.223	159.512	12.82	57.2154	49.127	15.39	107.053	83.291	10.479	12.619	209.952	42.143	133.137	50.006	28.3535	47.89	165.302	47.596	52.761	61.023	145.906	8.44	83.335
	12.3077	28.118	10.565	56.172	41.982	61.384	232.292	72.688	59.429	10.667	138.956	58.012	13.74	10.766	12.703	9.669	100.488	109.606	120.362	179.327	12.793	54.8187	21.333	15.264	111.381	76.047	12.292	9.78	146.608	50.197	125.547	65.522	16.5771	48.756	184.833	46.0628	53.381	68.703	156.25	7.368	83.763
	12.5641	29.936	11.926	72.717	23.758	53.358	187.322	86.77	59.452	12.157	144.27	57.78	13.062	10.5	12.413	9.322	78.987	87.204	119.422	174.716	10.936	56.1947	11.889	15.752	129.778	70.438	13.699	10.226	96.678	53.583	113.073	91.031	11.7285	49.667	180.15	41.3566	55.091	84.604	173.652	9.006	92.573
	12.8205	30.928	10.789	84.919	12.444	47.693	126.428	85.496	57.888	10.125	136.087	57.492	13.795	11.81	10.397	12.04	78.852	94.034	116.04	158	9.924	57.4732	9	23.883	121.905	73.322	11.557	8.981	61.992	56.459	101.452	71.968	9.2118	51.066	168.766	45.0026	55.075	103.539	192.16	11.389	96.219
	13.0769	39.107	12.095	87.086	9.36	47.259	78.243	64.3	61.333	12.656	128.305	59.306	15.234	11.67	8.949	11.019	78.669	124.242	118.822	150.781	13.126	56.8346	8	35.099	115.762	68.516	10.575	9.418	51.626	60.578	86.194	70.538	9.6645	58.267	165.554	40.5971	55.321	120.978	193.466	12.732	92.136
	13.3333	51.667	12.279	75.505	12	46.761	41.667	69.978	61.065	9.333	118.572	62.529	11.927	11.605	7.903	8.973	74.922	102.59	121.392	133.275	11.667	58.6778	11.365	40.854	130.138	70.363	12.233	12.517	31.699	73.075	65.238	76.152	8.9209	60.25	148.015	48.7305	61.205	106.663	185.228	11.208	91.685
	13.5897	69.952	12.411	60.323	9.944	47.456	26.51	102.233	66.897	11.016	109.231	64.732	14.873	10.752	8.684	8.513	83.814	70.939	125.311	122.834	9.264	62.3279	8	46.163	144.894	80.258	13.521	11.195	15.77	74.59	47.89	88.647	8.0541	60.451	93.625	52.8299	62.194	78.019	168.801	11.931	98.831
	13.8462	102.124	9.798	50.051	11.869	52.455	19.476	122.548	82.511	11.052	110.333	66.482	14.44	11.703	9.549	9.284	99.78	48.727	127.371	107.743	9.828	69.4387	9.19	46.653	164.095	76.272	13.174	11.054	10.919	72.405	39.013	108.025	9.0869	60.166	45.606	51.5152	57.124	55.473	159.573	11.733	113.805
	14.1026	132.888	11.151	42.444	12.544	67.038	12.356	109.805	88.922	9.152	102.239	64.808	12.032	12.915	12.603	8.752	96.126	45.284	113.934	95.039	10.807	76.5376	9.619	28	202.82	78.645	11.471	12.351	8.805	69.111	38.24	127.798	9.618	58.077	25.588	55.4046	54.417	53.942	159.47	10.716	117.371
	14.359	127.807	10.531	32.626	12.425	82.068	10.056	113.683	88.837	13.167	94.501	70.482	14.399	12.667	11.813	8.197	66.941	43.055	93.028	81.049	9.528	82.2164	11.333	14.696	240.556	84.786	10.643	12.269	7.413	75.667	42.363	173.196	9.7801	60.088	15.601	58.9002	54.069	38.239	161.035	10.301	117.286
	14.6154	93.669	9.488	22.788	11.627	106.652	10.671	124.827	81.137	13.154	92.374	72.903	13.832		8.497	8.731	31.961	40.101	75.837	76.721	9.044	97.2246	8.952	12.631	247.952	88.167	9.125	9.778	8.922	71.694	50.924	208.503	10.671	65.626	11.51	60.5556	52.118	19.54	158.152	11.581	121
	14.8718	45.893	10.766	17.465	10.6	200.067	9.651	148.601	85.428	13.566	96.591	74.511	11.486		9.17	9.278	10.778	35.533	60.129	75.485	8.312	99.6097	8.746	12.555	233.127	79.224	15.038	8.884	7.848	70.881	53.48	233.902	10.0662	76.962	11.489	59.7018	57.116	11.887	142.095	12.778	121.758
	15.1282	33.329	12.456	13.348	10.218	248.692	14.104	166.899	97.063	12.555	122.586	74.858	10.99		9.977	12.39	8.718	34.327	56.838	74.321	12.952	104.324	11.27	11.019	214.556	77.574	9.673	9.873	11.666	72.944	58.145	255	12.3384	95.115	10.082	66.7811	64.306	10.889	148.642		111.733
	15.3846	38.598	12.62	16.253	13.964	245.044	12.726	155.51	122.938	11.417	174.269	71.966	13.45		9.286	12.132	8.689	34.03	63.842	77.429	12.353	103.143	12	9.953	200.302	83.144	8.994	11.513	10.503	80.918	64.766	254.008	10.8266	110.471	10.798	73.4211	69.207	15.613	147.825		106.08
	15.641	42.498	13.604	22.02	13.083	177.133	12.649	112.651	159.641	9.561	218.67	71.537	13.987		13.611	12.907	10.003	35.73	74.501	80.201	12.888	94.1976	12.19	11.704	159.423	78.952	12.744	12.822	7.643	84.537	72.704	249.275	9	124.849	11.247	81.2932	78.658	9.43	138.369		108.708
	15.8974	48.076	13.884	19.808	14.063	78.254	9.889	74.339	168.751	12.083	237.278	69.496	12.065		13.182	13.464	9.46	35.862	78.131	73.341	11.992	80.934	10.73	11.092	109.069	83.12	8.571	8.445	7.554	77.105	79.186	236.98	10.0373	127.865	10.698	89.6681	88.028	11.819	125.96		94.449
	16.1538	36.207	13.333	11.99	12.809	36.412	9.429	58.056	134.021	12.081	234.704	69.156	12.432		11.76	12.548	9.162	39.485	80.834	64.533	11.15	76.668	10	12.008	67.444	82.814	8.836	10.959	8.726	76.25	78.199	218.39	10.2413	124.776	9.167	92.9668	86.544	9.08	115.248		84.033
	16.4103	18.652		13.162	13.329	18.595	12.837	44.243	101.836	13.333	211.393	73.577	11.463		10.652	11.796	9.832	45.128	80.211	63.525	9.033	77.3278	8.651	14.155	37.958	92.527	12.93	10.631	11.714	75.85	67.188	212.997	10.7485	125.408	9.511	92.8795	81.045	10.603	102.632		79.168
	16.6667	13.556		14.47	11.716	11.692	13.321	20.806	86.382		196.881	77.611	11.864		11.857	10.433	12.786	64.515	72.198	70.402	9.889	73.4046	9.73	11.987	18.624	92.061	9.744	8.398	10.924	74.553	46	232.363	10	137.196	11.186	92.6434	78.747	12.98	104.073		80.885
	16.9231	11.213		14.222	12.48	9.852	11.876	14.856	93.86		208.209	79.382	13.201		10.16	12.59	12.651	59.444	36.467	93.924		66.8809	12.476	10.667	10.905	98.591	10.51	9.933	8.034	72.52	25.148	234.279	11.2613	159.567	11.333	87.0456	80.464	9.444	105.912		72.058
	17.1795	10.449		12.828	10.992	7.98	14.073	12.842	92.82		220.917	86.347	14.488		8.011	9.064	8.943	43.204	14.89	105.209		60.9573	9		9.64	99.101	9.293	11.847	8.69	74.672	14.26	221.575	12.8636	169.992	11.521	84.842	89.153	10.311	92.769		73.809
	17.4359	13.45		12.232	9.57	8.462	9.494	13.347	81.198		224.509	103.108	13.215		9.377	9.155	12.529	28.881	11.303	105.481		50.4915	8.413		8.169	98.076	7.536	10.762	9.249	77.558	9.426	193.427	11.0273	172.363	11.856	77.8597	104.626	12.352	83.793		88.32
	17.6923	13.784		13.667	10.015	10.984	10.718	12.081	70.116		206.883	126.42	10.749		10.583	9	12.299	23.364	11.261	99.867		43.4117	10.286		8.651	106.105	7.503	14.013	9.455	73.871	6.708	150.584	11.1519	162.947	10.289	74.5549	111.333	11.905	80.944		133.293
	17.9487	12.096		11	11.779	11.039	11.907	15.595	59.634		141.781	135.956	12.856		11.556		8.429	26.241	13.761	43.173		41.0674	12.111		9.222	123.693	8.847	13.464	10.764	71	7.986	133.44	11.4641	146.324	9.956	76.1569	117.351	11.982	78.915		241.387
	18.2051	9.3		12.333	10.076	10.949	10.527	14.723	54.033		59.967	133.646	13.909				8.671	32.455	12.998	16.043		40.9574	8		10.148	122.808	9.784	11.528	7.706	73.869	7.135	125.122	11.8076	126.35	12.014	67.4227	122.934	15.333	80.515		215.95
	18.4615	11.462		15	13.053	8.774	12.364	10.833	54.193		27.926	167.196	11.283				12.49	49.667	12.85	10.162		31.9807	8.476		10.063	111.209	9.441	10.426	11.05	78.653	6.901	119.987	13.84	104.882	11.451	58.5069	119.785		71.172		219.914
	18.7179	13.513		13.667	15.373	11.525	12.981	13.058	48.408		20.049	172.815	13.667				11.19	58.997	12.017	10.058		24.79	8		8.217	102.147	9.556	12.166	8.361	88.85	7.347	74.896	14.1456	89.021	10.333	57.088	105.949		68.171		189.358
	18.9744	13.553		12	13.951	10.341	11.038	11.318	30.569		12.57	90.182					9.972	71.03	10.995	11.517		18.5999	9.968		10.175	103.031		12.667	7.68	102.241	8.684	37.644	13.3333	78.209	10.921	58.772	94.615		59.562		174.338
	19.2308	12.92		14.333	11.889	12.931	13.193	13.264	18.668		12.756	37.357					12.632	73.616	11.221	12.19		11.3623	10.095		12.714	99.218			7.98	105.709	8.405	21.912		49.088	11.333	67.5343	87.739		51.131		189.529
	19.4872	12.019		14.313		17.608	12.636	14.08	13.205		13.611	22.164					13.106	54.73	11.114	10.861		8.7042	8.46		12.127	99			12.375	122.116	8.193	13.645		22.313	9.55	68.4074	81.656		47.739		209.79
	19.7436	11.276		12.389		17.668	11.405	14.195	12.069		14.926	11.637					11.215	48.136	11.135	13.012		9.0088	9.778		10.037	93.349			7.982	120.833	10.075	10.059		11.313	11.323	63.994	72.258		47.311		215.693
	20	11		11.909		12.17	12	14.558	9.654		15.894	8.548					12.416	45.848	12.002	11.6		11.8118	10.714		10.762	86.891			9.642	146.381	8.524	8.295		8.919	11.128	59.0997	62.599		44.502		235.133
	20.2564	14.498		14.798		10.651		13.548	12.658		16.148	12.405					12.341	52.19	10.308	9.673		10.9355	12.825		13.709	82.736			9.61	184.281	10.323	7.771		10.768	10.07	56.1721	46.224		41.522		254.709
	20.5128	11.984		14.293		10.201		12.842	10.977		13.182	11.362					10.45	53.323	9	8.762		11.6856	13.397		13.873	66.685			7.53	226.789	10.043	9.678		9.343	10.131	52.5334	27.095		41.414		253.741
	20.7692	12.358		13.253		9.587		13.368	10.316		13.333	11.528					11.07	65.303	9.691	10.514		8.9998	11.143		13.46	71.713			7.628	229.758	12.393	10.052		8.69	8.369	49.6039	12.471		51.925		252.359
	21.0256	13.128		13.343		11.687		12.689	10.684		11.414	12.881					11.064	67.439	9.72	9.982		11.6178	10.905		11.593	66.963			7.897	155.007	9.091	8.757		9.571	8.769	51.7895	7.886		68.003		252.581
	21.2821	12.064		11.419		12.616		13.775	14.471		14.72	9.991					10.397	62.099	10.669	10.799		9.983	9		10.672	74.381			7.096	126.82	12.003	9.111		9.472	11.522	63.2197	8.377		59.659		217.974
	21.5385	11.065		9.717		11.523		12.357	13.745		11	12.605					9.442	54.172	10.716	10.089		9.2269	10		12.333	70.925			7.862	157.667	11.077	11.371		11.354	10.801	77.8292	10.592		50.939		205.874
	21.7949	12.344		10.798		10.422		10.432	13.395		13.665	10.782					11.021	52.048	12.87	9.115		10.3778				66.523			9.499	166.51	8.307	12.763		10.129	9.875	90.9336	10.083		51.661		163.342
	22.0513	10.903		10.232		12.701		11.508	14.066		12.051	13.096					11.753	45.584	13.261	7.88		7.9115				56.556			8.321	140.813	10.131	7.49		10.269	9.581	104.596	8.756		47.284		162.103
	22.3077	8.124		9.288		13.464		13.796	11.188		11.926	10.604					8.889	46.879	10.455	11.19		10.7277				54.752			7.568	117.269	11.727	8.159		11.825	12.284	105.177	7.642		39.866		131.331
	22.5641	10.886		11.111		10.45		11.89	14.314		11.037	9.464						48.605	9.157	11.07		9.926				51.488			9.343	89.095	13.273	7.159		14.104	13.576	85.0674	9.844		38.342		108.673
	22.8205	9.759				9.648		12.095	12.551		12.784	11.667						52.355	12.333	9.464		8.9005				47.129			12.333	62.81	12.882	11.789		12.83	13.12	55.3896	11.749		39.75		82.841
	23.0769	9.533				10.045		13.968	13.86		9.864							47.333		8.905		10.8037				52.469				35.704	14.123	9.153		12.242	12.357	21.7341	11.825		40.855		65.426
	23.3333	12.833				11.108		10.277	10.972		12.189							50.952		8.407		10.4378				63.477				17	13.667	11.721		12.048	10.493	11.7432	11.937		42.768		62.89
	23.5897	11.38				10.369		10.747	13.817		10.165							44.622		11.817		10.805				64.894				13.735		9.602		10.102	10.749	9.3607	12		50.719		37.935
	23.8462	10.734				11.665		13.941	14.797		10.04							45.101		12.289		12.0966				70.229				10.196		9.119		13.372	12.422	12.4792			58.274		19.742
	24.1026	9.652				11.05		12.125	12.879		9.97							47.507		10.497		11.3942				71.062				10.313		13.07		11.044	10.812	13.1977			62.27		13.687
	24.359	10.172				11.686		11	11.059		9.863							45.212		11.914		9.785				53.167				9.956		11.89		13.74	10.766	11.9259			59.448		14.877
	24.6154	10.391				11.552			11.626		12.402							41.576		12.2		11.2492				41.505				11.837		11.484		11.869	12.218	10.7842			60.693		11.445
	24.8718	10.049				13.403			11.751		13.916							40.614		12.569		10.1159				38.229				10.15		12.758		13.896	11.778	13.9164			59.043		10.574
	25.1282	10.049				13.97			9.766		11.484							40.218		12.383		9.1487				44.99				13		13.023		11		12.0707			57.273		10.439
	25.3846	11.692				11.333			12.469		12.457							42.667		10.733		10.0025				54.005				11.463		10.831				12.759			51.653		9
	25.641	11.542							12.281		13.451							51.988		10.538		11.6055				71.444				12.81		12.317				14.0467			48.257		10.614
	25.8974	12.463							13.887		14.159							69.932		12.303		10.5431				88.159				9.514		9.809				12.6268			50.103		10.65
	26.1538	13.337							13.111		14.303							113.657		12.578		9.5122				76.458				11.112		8.817				12.7784			46.855		10.715
	26.4103	12.508									13.575							151.351		11.175		10.7613				91.59				12.974		10.061				10.6316			52.237		8.024
	26.6667	11.889									12.265							170.054		7.825		12.8938				78.82				9.871		8.132				13.2945			50.358		9.936
	26.9231										11.63							154.667		11.667		11.2976				92.383				10		6.958				11.3697			55.58		8.716
	27.1795										12.469							147.174				9.7737				74.827				10.983		8.368				9.5312			46.321		10.467
	27.4359										11.432							112.935				7.3333				70.238				12.041		10.043				12.1723			28.378		10.214
	27.6923										13.556							64.576								53.53				13.469		8.857				11.0526			17.471		8.131
	27.9487																	31.747								41.047				11.213		10.808				9.8304			13.424		7.392
	28.2051																	17.605								38.358				13.163		10.305				9.3721			11.627		6.251
	28.4615																	13.283								34.081				14.209		9.003				9.0351			10.421		5.289
	28.7179																	10.742								35.632				14		11.025				13.9067			11.055		6.95
	28.9744																	11.123								29.828						9.889				13.5312			12.228		6.928
	29.2308																	7.061								30.444										10.7778			11.576		6.333
	29.4872																	10.934								30.843													11.466
	29.7436																	9.404								30.426													10.05
	30																	12.03								33.693													10.234
	X	AKAP220KO
	0	9.396	30.333	40	10.333	19.333	41.333	55.444	33.333	55.778	24.444	40	27.889	59.444	29	24.222	31.333	25	25	36	37.556	30.111	40.333	23.667	40.333	25.444	22	39.111	33	30.667	39.111	17	18.667	23.222	19	32.667	34	21.667	13.333	13.778	48.111	12.778	49	12.667	32	17.778	22.222	19.444	21.667
	0.2564	8.121	33.126	52.889	8.777	19.954	39.88	63.136	31.728	45.903	28.848	42.035	29.497	60.019	27.488	26.361	26.555	27.492	29.441	41.797	43.44	40.734	44.718	29.583	43.333	26.947	24.623	37.079	36.004	41.423	40.082	14.389	28.333	15.75	18.182	38.021	48.274	20.886	17.694	12.425	40.111	14.28	35.889	10.751	30.986	15.425	20.007	14.823	23.846
	0.5128	8.841	27.292	80.914	10.771	30.82	37.837	68.905	28.965	40.903	27.05	42.533	33.416	47.804	23.531	27.433	31.608	32.434	33.467	45.082	44.563	46.224	45.948	34.145	63	36.365	31.036	35.621	37.163	47.443	46.957	15.043	30.667	20.076	13.531	43.361	31.498	20.58	17.16	13.477	38.111	12.44	40	11.871	20.769	13	20.313	12.954	28.385
	0.7692	11.204	31.108	48.667	10.308	49.87	39.32	60.965	33.18	34.952	20.544	38.318	28.644	44.084	19.938	28.913	44.936	34.576	38.095	62.192	43.622	38.135	46.485	34.649	71.667	49.019	33.129	35.978	38.088	44.035	54.654	16.084	26.333	17.873	12.021	44.969	23.628	20.037	21.286	13.835	40.111	10.389	37.472	13.509	16.781	15.249	19.25	13.83	37.683
	1.0256	12.128	24.492	34.877	7.787	62.555	45.616	44.033	31.669	36.758	16.509	33.834	26.35	40.981	25.527	37.229	51.011	33.349	35.831	79.036	42.12	40.308	46.148	36.343	60	60.307	27.791	29.714	36.766	44.74	58.053	18.26	27.333	12.503	12.917	41.265	22.882	22.886	15.697	14.439	39.333	10.461	35.222	13.323	18.306	16.559	21.347	16.623	46.315
	1.2821	13.217	20.693	39.025	10.694	65.667	52.08	31.201	23.921	34.193	15.872	29.443	23.457	34.938	29.137	33.533	51.517	29.438	30.26	79.48	49.726	34.775	43.022	42.443	45.667	71.276	26.327	26.51	37.589	54.723	44.664	23.426	27.667	14.077	14.102	35.196	20.609	22.045	16.389	16.937	34	12.216	32.75	13.468	22.122	15.76	21.533	14.563	45.425
	1.5385	14	18.196	39.667	8.603	68.407	50.999	28.843	25.59	28.081	15.716	31.048	19.58	26.996	29.537	30.074	45.614	27.713	27.428	69.739	44.175	29.402	46.731	66.185	40.333	83.791	26.344	29.259	45.096	54.294	36.54	26.646	29.333	17.051	18.49	29.292	20.3	21.111	16.51	25.055	31.667	12.319	30.833	14.522	20.118	15.106	19.605	16.022	41.529
	1.7949	12.615	17.419	36.877	8.874	69.099	49.796	31.847	27.806	21.348	17.277	27.893	18.062	27.695	30.802	33.647	47.401	34.444	27.582	55.236	44.455	30.953	45.975	97.259	38.667	100.101	25.418	39.722	72.431	43.661	31.442	25.076	35	15.066	13.81	28.715	24.132	24.649	12.865	30.67	35.667	12.72	28.028	17.874	18.921	15	17.309	17.913	30.416
	2.0513	11.276	19.667	42.901	10.184	69.973	52.614	36.285	32.955	23.664	23.306	25.021	21.83	25.999	36.423	42.298	51.342	38.978	34.876	50.494	43.622	29.306	48.464	89.909	32.333	116.751	26.706	38.313	123.627	38.841	31.734	29.425	31.667	14.466	12.5	30	22.145	21.299	13.441	33.569	40.778	11.992	23	21.299	18.782	20.275	16.426	20.151	24.466
	2.3077	11.579	21.894	53.444	8.179	40.49	48.942	34.079	45.283	26.65	22.959	25.062	24.738	26.83	39.975	45.694	45.337	37.412	35.558	51.397	38.18	30.402	52.455	87.95	33.333	117.682	35.122	41.244	134.814	41.725	37.491	35.227	21.333	21.853	14.625	31.093	23.925	28.489	13.785	30.581	40.333	12.292	25.306	35.205	24.429	24.508	16.243	17.215	23.196
	2.5641	13.523	25.647	57.222	10.966	28.308	46.115	31.235	57.291	22.297	18.753	31.768	28.255	24.809	31.924	45.171	51.22	28.607	30.649	47.162	45.513	30.574	56.634	77.78	29.667	110.861	39.392	44.304	85.236	35.617	34.043	42.541	24.333	22.278	19.656	33	23.281	36.111	12.559	29.945	38.222	10.579	23.222	54.326	28.701	22.329	18.015	14.215	23.79
	2.8205	13.352	41.882	53.914	11.359	25.061	43.695	24.877	56.079	25.516	19.176	41.526	33.754	21.704	20.685	40.63	48.807	24.231	31.353	38.743	53.837	33.385	57.346	64.975	38.333	110.232	61.728	44.366	49.099	26.042	37.809	40.491	27.667	20.685	21.32	30.773	21.796	36.845	12.895	28.841	37.667	11.654	24	54.902	19.231	19.84	20.21	13.036	23.011
	3.0769	13.26	62.191	43	9.451	33.774	43.019	24.386	59.99	24.26	23.042	52.142	32.298	21.355	22.819	36.672	47.944	22.965	27.369	27.517	58.939	39.745	55.823	53.31	65.333	130.181	76.672	51.136	44.289	29.28	37.975	31.404	25	21.895	20.5	25.127	27.617	34.704	14.722	25.679	35.889	14.425	28.222	35.389	16.756	20.032	19.501	15.223	20.057
	3.3333	14.914	61.587	52.531	11	39.99	47.325	30.257	63.303	27.774	29.387	61.889	29.847	21.439	25.702	37.441	45.055	21.921	21.972	23.453	44.564	50	52.18	53.487	137.667	147.943	52.393	51.768	39.396	21.915	34.429	32.347	24.333	22.876	19.375	23.89	32.201	21.701	16.596	25.55	30.556	15.671	28.694	27.308	15.092	32.256	18.415	16.135	21.114
	3.5897	13.863	72.964	62.099	12.301	46.621	51.283	42.093	57.043	26.701	40.204	83.938	28.838	25.114	26.506	35.682	42.502	19.182	22.683	21.877	43.507	66.957	51.707	61.688	190.333	162.044	44.16	47.556	34.229	21.173	30.155	36.435	25.667	21.838	16.031	24.33	29.725	23.357	15.654	24.266	31.444	15.213	31.833	23.901	16.337	35.691	18.509	18.379	23.083
	3.8462	15.713	87.004	81.333	15.337	35.014	55.957	45.973	47.758	25.229	37.644	105.647	34.963	27.901	32.107	31.479	41.654	19.236	22.385	18.927	60.701	134.245	59.244	74.293	212.333	158.111	61.143	53.38	29.344	24.098	32.78	37.072	38.333	26.31	14.065	19.615	30.241	22.333	16.105	25.244	29	14.794	32.694	20.841	19.088	32.409	21.643	24.969	22.549
	4.1026	17.614	71.277	116.815	18.968	47.445	70.045	33.961	42.271	23.979	34.675	132.377	34.77	29.354	42.492	28.854	36.474	20.501	26.462	17.505	82.994	229.473	69.135	75.411	193	134.439	98.489	66.984	25.141	26.153	35.487	33.65	64.333	31.096	14.667	18.612	31.351	20.658	18.522	24.545	28.556	13.06	34.889	14.409	20.128	29.915	29.087	35.677	24.41
	4.359	17.185	48.645	176.765	29.25	78.428	74.331	19.503	44.52	22.83	44.771	169	31.018	26.552	60.275	24	27.993	22.391	33.971	22.033	95.615	254.182	71.505	70.263	152.667	100.833	122.054	75.043	26.47	26	39.717	29.643	106	22.747	17.062	17.608	28.999	24.304	17.204	23.161	30.889	11.66	37.917	16.444	21.131	21.976	30.691	47.631	27.067
	4.6154	19.712	38.903	239.667	61.786	69.673	70.447	16.827	47.365	25.736	83.916	165.969	25.214	26.547	98.044	26.482	29.864	27.965	40.362	17.146	108.65	255	62.836	54.672	134	85.886	101.984	73.027	38.873	18.146	50.543	28.369	173	16.979	18.052	17.395	25.769	40.822	15.895	20.733	33	14.634	31.389	16.292	24.837	19.476	29.269	56.364	28.637
	4.8718	26.536	35.229	255	162.452	35.707	62.141	15.253	53.098	28.675	103.173	176.616	22.632	23.103	164.033	24.649	35.907	28.474	42.424	17.917	123.371	255	59.613	45.036	154.667	83.13	51.064	70.406	71.716	15.922	54.968	25.911	239	15.028	18.857	20.392	21.693	65.588	14.973	21.503	43.667	18.972	29.167	14.773	29.233	18.71	38.529	41.746	37.116
	5.1282	40.101	37.528	255	248.984	22.531	66.395	16.295	60.611	27.793	98.16	213.571	21.644	27.382	199.222	21.948	30.335	23.134	42.661	18.948	133.991	255	56.087	52.641	195	85.632	47.304	79.873	111.497	17.997	45.69	23.546	255	16.287	16.5	22.392	23.605	64.617	16.743	23.68	63.778	19.876	33.667	15.971	30.059	15.693	35.777	27.181	66.927
	5.3846	83.215	41.213	255	255	21.741	83.735	20.575	66.814	31.929	126.293	238.858	19.912	29.029	192.774	22.365	28.899	23.306	47.479	24.729	155.028	240.328	42.692	74.445	238	87.946	47.28	107.667	130.281	20.512	36.493	27.283	255	20.432	16.979	20.405	26.904	104.007	15.794	27.568	90.222	17.642	36.583	18.918	30.679	15.389	28.054	21.863	74.018
	5.641	166.007	41.678	255	255	31.08	83.749	28.458	75.967	43.732	166.019	248.076	22.829	26.839	179.956	29.781	27.842	22.553	45.691	29.887	171.048	159.414	31.681	65.634	254	77.211	56.943	111.921	156.818	26.406	33.434	35.977	255	24.385	14.948	20.182	23.088	232.151	17.868	29.042	125.889	14.673	49.722	18.937	46.848	15.908	27.212	19.164	53.753
	5.8974	214.298	42.176	211.185	255	45.691	77.609	43.857	90.72	45.037	196.06	252.907	26.44	27.89	180.204	41.872	27.633	26.405	42.426	34.093	176.397	93.593	31.77	64.05	255	77.169	70.006	113.418	231.252	44.145	30.239	38.675	255	20.762	16.852	21.062	26.543	255	17.068	24.473	130.556	14.788	69.25	15.584	52.884	15.029	32.811	17.387	35.25
	6.1538	171.25	45.195	142	247.221	78.367	78.028	65.379	111.125	44.433	229.723	233.682	28.425	35.98	200.402	44.668	25.731	31.198	43.88	34.123	177.475	61.596	34.943	89.342	255	97.518	98.818	105.698	254.778	81.844	31.631	34.706	255	19.135	18.333	29.821	39.309	255	14.299	19.178	104.778	14.396	109.667	16.595	40.576	13.692	56.576	18.502	32.695
	6.4103	99.762	54.028	91.605	203.193	113.776	76.805	72.401	162.019	43.84	224.028	182.699	29.613	47.072	145.973	48.231	23.05	46.32	43.387	30.279	193.847	49.095	44.989	116.415	254.667	110.137	239.057	100.245	255	104.627	43.099	35.349	255	20.729	17.078	44.708	23.89	255	15.332	15.623	104.222	13.973	187.139	17.549	24.02	18.222	111.497	18.758	39.583
	6.6667	60.671	67.862	70.519	150.444	150.548	75.053	80.856	231.889	47.861	202.8	159.779	33.862	42.583	75.396	60.671	21.917	102.384	42.272	23.337	245.045	47.889	46.793	137.556	205	98.509	254	105.816	255	100.685	50.511	35.215	255	26.518	16.312	54	19.293	195.451	16.545	14.679	110.667	13.454	246.5	18.707	23.124	18.773	164.952	22.125	61.647
	6.9231	45.486	83.584	58.222	125.724	204.054	91.609	86.105	255	45.706	176.515	167.384	36.309	44.893	65.298	91.146	21.391	195.611	39.804	21.042	255	47.576	38.677	144.185	191.333	78.333	254	116.562	252.307	90.487	43.341	33.677	255	27.313	18.112	52.722	23.429	76.333	17.219	15.785	118.222	13.778	254.861	18.392	18.19	16.61	187.664	27.82	70.071
	7.1795	37.03	110.39	53.926	106.049	245.856	99.279	73.705	255	48.821	144.943	155.675	33.509	45.856	61.962	140.114	22.193	195.188	38.373	18.782	250.041	46.284	35.456	169.868	156.333	66.628	252.227	116	216.791	80.827	37.705	29.552	255	26.95	22.333	47.564	24.277	33.966	21.678	19.153	140.556	15.853	254.667	13.333	19.3	16.741	219.093	37.218	66.793
	7.4359	37.195	160.531	48.84	102.425	254.641	108.586	60.283	255	56.52	104.296	153.211	32.628	47.457	45.252	179.125	22.692	207.152	42.674	20.524	206.836	43.25	41.592	217.284	134	62.345	255	108.413	167.036	82.858	43.481	26.236	255	21.668	28.359	37.371	24.799	31.308	23.678	16.108	204.222	18.069	254	14.459	23.752	18.24	248.942	55.132	60.117
	7.6923	43.667	227.207	38.667	95.206	205.225	116.48	52.208	255	70.603	78.637	155.391	35.755	47.046	43.858	189.078	22.127	254.162	43.061	24.298	163.541	44.477	78.471	251.163	121.667	59.682	255	100.229	133.886	137.85	43.185	29.466	234.667	16.727	40.365	25.636	32.579	27.889	28.789	19.681	247.111	15.826	249	18.964	27.833	17.422	253.812	73.63	55.418
	7.9487	38.837	252.714	24.42	83.29	116.347	131.67	47.201	255	140.003	73.398	140.069	42.761	54.645	55.677	186.622	19.179	250.188	40.222	35.014	151.357	44.302	142.882	254.977	123	63.097	255	109.842	106.947	214.934	48.573	35.477	173.667	19.718	56.286	20.44	63.528	26.167	48.954	23.199	255	16.636	152.028	20.361	30.32	21.496	249.455	83.333	47.474
	8.2051	31.729	255	20.667	64.69	65.624	152.747	42.856	227.584	183.88	59.03	117.862	57.883	63.501	64.33	171.581	20.257	221.215	35.583	48.683	146.372	45.569	211.638	255	107	80.04	255	115.125	86.226	252.869	46.206	38.259	119.667	26.571	56	23.66	99.546	27.286	68.55	31.56	255	20.176	77	19.982	36.733	30.52	235.244	85.855	50.588
	8.4615	31.333	255	17.333	49.844	48.352	182.247	34.773	138.188	158.639	45.082	99.775	111.059	122.549	54.963	164.211	29.111	188.17	32.607	42.242	135.946	48.953	251.665	255	86.333	111.078	206.916	132.38	65.105	225.311	44.637	34.014	87	41.854	86.56	30.127	131.475	24.156	63.358	44.741	255	26.46	44.389	18.54	44.806	35.012	220.646	86.294	49.014
	8.7179	30.159	255	19.432	40.341	43.737	211.793	27.016	72.312	156.977	41.303	95	187.714	183.659	39.337	180.889	32.415	147.523	29.998	37.674	151.628	48.367	240.866	255	63	170.142	152.269	161.116	52.271	134	46.54	30.656	68	80.948	161.438	27.698	179.127	19.496	91.151	53.58	251.444	29.812	29.611	22.222	50.425	35.414	205.463	98.618	39.924
	8.9744	27.693	250.435	18.593	41.964	44.004	230.611	20.019	39.193	129.267	34.795	96.744	238.782	162.674	25.869	193.678	39.772	134.306	30.403	33.147	159.303	51.03	206.514	255	51.333	228.556	147.111	191.75	37.81	67.83	51.329	32.533	48.667	125.469	245.859	19.093	230.112	19.988	160.511	61.326	179.222	32.723	24.25	19.514	44.668	47.493	176.973	132.821	48.257
	9.2308	28.55	206.776	16	45.807	40.483	249.472	17.588	25.929	149.827	38.246	84.761	253.635	153.822	32.961	199.961	43.889	164.377	33.606	31.942	146.874	50.373	177.722	251.948	42.333	249.929	182.433	190.846	16.42	37.193	63.401	36.54	33	162.187	255	18	254	20.778	241.579	77.1	92.444	37.996	24.111	23.494	48.21	40.402	151.42	175.881	72.461
	9.4872	32.651	120.356	15.926	35.375	27.832	247.168	22.755	19.531	202.782	46.247	74.941	253.42	106.111	41.207	183.075	36.069	171.013	29.546	28.546	125.513	50.864	164.843	224.533	42.333	254.486	191.589	191.502	9.862	18.571	89.89	41.031	20.333	225.667	255	19.842	254.312	19.224	255	94.728	51.333	39.865	20.056	29.335	74.067	30.622	144.307	234.85	96.144
	9.7436	37.226	66.787	14.346	52.091	14.762	255	40.973	15.508	254.11	48.691	90.471	250.116	139.449	29.442	151.803	35.22	186.837	25.007	24.425	107.682	44.287	165.72	203.674	46	255	195.883	225.29	10.037	11.422	139.888	47.561	15.333	254.824	255	35.454	255	18.811	255	118.341	35.444	45.196	16.333	24.11	88.864	41.211	122.708	246.89	200.146
	10	47.882	40.467	10	61.222	10.19	255	78.817	14.312	254.618	47.453	118.706	240.577	195.934	25.4	132.281	42.369	216.134	29.201	23.024	102.099	25.889	159.964	162.036	50	255	208.365	250.993	9.532	9.978	163.494	54.052	14.667	255	207.477	44.924	254.779	18.274	255	155.757	25.556	54.998	19.944	24.28	93.146	67.349	87.519	229.827	253.232
	10.2564		26.446	11.407	66.527	10.015	255	131.46	15.181	255	38.657	104.893	217.189	244.408	24.306	129.058	44.116	249.062	27.571	24.111	105.965	12.769	151.5	107.585	46.333	255	228.492	255	7.838	9.24	159.472	59.076	11.667	255	102.5	36.588	253.815	17.313	254.137	183.965	21.111	83.579	23.333	28.023	89.613	89.209	70.684	235.002	255
	10.5128		17.988	12.222	63.335	10.548	255	172.869	11.787	248.513	34.294	62.872	170.433	254.333	24.839	114.474	47.683	254.377	31.452	28.121	93.744	11.794	134.778	69.811	42.667	255	251.654	255	9.403	10.436	137.859	60.294	12.333	255	70.648	35.474	246.25	17.051	251.584	198.298	19	119.123	21.667	33.328	57.761	134.277	62.436	254.052	255
	10.7692		16.754	9.333	56.696	11.148	251.201	194.274	10.198	242.733	31.477	54.595	137.587	255	19.432	114.538	61.975	252.714	34.075	35.605	87.821	11.423	127.609	61.427	36.667	239.777	254.16	255	6.659	12.844	122.021	58.369	15	255	36.979	51.763	191.253	19.8	132.34	209.787	18.111	148.271	18.111	40.529	55.926	146	58.263	255	255
	11.0256		14.204	9.235	44.176	11.468	224.635	206.505	9.353	252.227	41.647	62.339	185.393	252.395	15.595	118.622	80.226	230.027	39.842	46.401	101.183	11.633	140.91	46.788	23.667	192.77	251.32	255	7.78	9.127	126.158	61.061	13.333	255	19.862	83.914	124.166	27.789	48.872	193.005	17.333	157.124	21.806	74.582	89.921	144.177	56.321	255	255
	11.2821		13.02	10.025	39.861	7.486	184.164	232.242	10.267	255	65.564	79.979	225.913	247.349	15.85	113.626	106.36	157.755	52.364	63.233	113.966	8.863	175.413	29.031	14.333	148.538	168.73	237.39	9.057	7.952	156.366	67.124	11.333	255	15.25	113.567	95.304	35.496	20.747	162.281	21.444	160.606	48	165.857	113.062	195.149	60.704	255	255
	11.5385		11.189	11.556	41.254	11.776	163.978	247.839	14.077	255	70.995	85.668	254.001	254.494	17.361	104.13	152.04	131.029	82.025	78.5	77.083	11.71	213.801	15.275	12	134.104	110.612	139.198	8.762	10.309	216.902	79.72	14	250.364	11.602	136.296	88.366	38.667	14.426	119.824	25	188.374	66.611	253.302	152.489	245.258	67.277	255	255
	11.7949		10.221		43.292	10.27	140.627	255	13.95	255	55.64	83.495	254.274	255	17.33	86.145	204.769	149.31	95.211	120.402	53.704	10.154	231.793	16.151	11.667	130.512	92.119	75.787	10.145	12.295	255	91.921	14	215.387	8.365	176.45	97.071		12.683	91.061	24.556	220.295	47.556	255	184.007	255	63.934	255	255
	12.0513		9.876		56.141	9.507	108.163	249.299	10.814	255	39.812	68.1	254.99	255	22.221	60.844	244.282	173.617	90.703	153.565	47.305	8.508	196.256	9.572	10	113.285	90.347	45.665	10.131	12.125	254.996	107.01	14	177.236	9.789	231.268	118.281		13.002	76.872	26.222	255	42.25	255	226.101	255	51.732	254.027	255
	12.3077		10.655		55.911	11.834	84.243	217.239	9.943	197.122	34.423	52.862	246.691	255	39.067	45.187	253.657	185.741	84.051	162.716	52.891	10.684	121.672	12.024	8.333	84.526	86.402	37.533	8.183	9.161	255	128.713	14	137.636	9.333	254	126.297		12.615	67.252	26	255	54.222	255	251.708	245.464	44.337	247.31	255
	12.5641		12.748		75.678	9.885	59.267	190.768	11.231	82.249	29.395	66.536	163.865	255	37.647	36.966	254.499	202.148	94.229	184.99	65.303	12.024	59.89	9.197	10.333	59.746	65.209	31.722	8.263	10.238	255	141.075	12.333	94.359	14.349	254	120.428		10.166	56.65	20.444	255	49.639	255	255	206.057	45.173	225.588	254.282
	12.8205		11.821		107.012	10.803	57.243	141.042	12.139	60.733	27.337	60.882	115.064	202.658	20.167	38.841	247.094	220.446	110.6	246.394	75.677	12.053	31.876	12.685	13	47.341	52.766	26.327	10.995	11.834	254.045	151.932	9	59.41	15.062	248.443	100.371		13.826	48.254	14.222	255	41.833	255	255	176.133	46.495	207.299	251.068
	13.0769		12.321		119.849	11.95	57.28	83.992	9.894	42.798	26.527	39	161.667	89.697	18.5	43.333	202.103	208.316	126.179	252.38	78.613	9.563	16.975	10.28	14	44.694	23.339	28.511	9.604	10	221.902	174.683	9	27.634	12.258	225.708	72.332		13.644	50.086	15	255	35.667	255	255	164.044	43.627	186.561	245.833
	13.3333		11.96		112.333	8.134	69.347	41.946	10.912	20.593	28.64		191.19	65.149	24.093	39.205	147.571	195.408	135.94	205.585	67.837	8	11.127	9	12	47.653	15.312	48.19	7.59	6.46	179.721	201.585	8.667	21.349	13.542	194.151	67.586		16.261	46.405	14.556	255	33.889	255	255	137.636	40.139	154.174	241.598
	13.5897		11.09			10.439	87.494	21.197	13.092	10.416	25.827		185.136	48.034	18.853	39.183	141.097	212.529	147.479	171.024	60.358		11.674	10.897	10	48.483	14.939	54.54	7	10.893	173.003	217.196	8	15.481	11.625	174.845	69.668		15.679	47.114	12.111	254.924	24.5	240.519	254.811	114.699	41.921	140.694	237.38
	13.8462		11.491			11.796	97.009	13.118	12.3	11.784	19.394		157.654	25.715	18.961	32.025	146.28	217.954	171.279	145.137	70.412		10.593	9.998	10	53.136	12.975	36.338	7.264	9.486	194.092	215	9	13.008	14.75	153.395	62.77		13.933	49.248	12	247.889	17.333	152.107	253.226	86.887	46.223	153.559	221.006
	14.1026		10.31			8.598	89.27	13.147	12.675	8.988	19.503		157.177	14.364	19.106	28.194	176.571	205.442	184.417	144.479	64.673		10.327	13.05	10	56.068	11.932	28.584	7.047	10.607	173.865	190.075	11.333	11.027	12.779	121.285	52.508		16.218	44.416	13.667	120.504	14.972	82.567	233.213	72.387	61.073	188.385	197.032
	14.359		10.64			7.305	74.341	9.359	10.52	9.347	18.53		147.399	10.788	24.93	28.83	191.007	123.328	198.72	164.731	35.207		11.885	10.041	12.667	53.239	10.827	40.556	8.934	8.82	126.251	155.456	10.667	13.787	14	109.155	46.947		12.228	44.792	15	80.167	14	46.404	206.531	64.077	87.179	200.205	219.461
	14.6154		9.698			7.909	51.265	10.524	10.24	12.226	18.985		116.367	9.356	26.31	26.29	195.385	31.081	189.966	175.276	26.631		9.652	9	10.667	47.518	9.257		10.556	8.249	65.011	116.127	9.333	15.422	13.5	105.649	49.92		10.809	40.784		67.402	15.361	31.43	204.057	78.767	93.14	190.709	230.362
	14.8718		14.062			11.348	38.71	12.4	11.686	9.031	23.629		99.949	8.86	19.904	25.778	217.774	11.246	188.405	192.567	20.948		9.338	9.173	8.667	41.225	9.285			10.887	29.257	77.107	12	12.805	13.448	95.206	56.367		10.264	38.876		66.304	16.056	19.57	190.907	85.345	65.85	154.889	254.162
	15.1282		14.974			12.989	31.379	8.646	14.639	10.025	28.132		131.41	10.103	17.474	26.734	251.333	10.393	185.357	229.048	18.559		12.995	13.33	11.667	38.987	9.043			10.1	14.855	48.643	12	10.505	13.695	83.495	66.572		13.517	38.931		69.458	12.667	20.557	187.251	86.824	33.955	131.548	254.563
	15.3846		10.256			12.112	40.725	9.107	11.972	10.263	26.986		192.754	13.805	20.278	28.202	253.424	8.329	187.495	254.547	24.471		13.59	10.458	10	37.967	10.388			8.812	10.67	35.424	10.667	13.71	13.75	73.223	81.374		17.347	37.284		65.739	12.444	20.145	175.425	94.991	18.71	119.748	253.259
	15.641		14.491			10.528	55.289	11.864	10	9.254	31.101		144.829	12.295	24.515	22.437	254.757	7.408	200.05	255	26.615		12.311	12.333		37.72	10.563			7.717	10.935	34.039	9.333	12.836	15.391	70	102.322		15.778	35.853		56.446	13.556	22.116	165.396	95.837	13.342	130.554	247.056
	15.8974		10.821			9.421	57.917	10.667		10.369	31.265		77.829	9.846	26.792	21.979	255	7.397	218.778	235.62	31.766		12.828	13.067		38.465	12.381			10.626	11.55	38.761	12	8.807	14.719	79.289	111.688			34.725		53.088	15	25.691	159.25	99.272	11.849	126.194	168.676
	16.1538		10.899			10.667	60.938	10.012		9.083	32.99		69.919	11.504	23.619	22.922	255	8.375	246.515	161.703	31.106		9.504	13		37.263	9.48			10.765	6.854	40.541	10.667	8.203	11.26	90.849	108.955			31.397		61.749	12.944	40.646	126.801	133.665	10.717	102.27	103.924
	16.4103		11.635				63.317	11.258		11.776	38.679		64.339	10.738	16.717	27.787	255	7.785	254.804	150.674	27.655		11.025	11.534		37.841	9.899			9.334	7.969	38.827	9	10.559	11	90.68	94.824			34.077		67.594	12.333	37.174	99.128	160.15	11.511	68.286	88.155
	16.6667		12.444				50.53	12.359		10.301	40.667		44.779	9.36	16.111	30.429	255	7.442	255	164.707	25.065		10.704	12.001		36.862	12.664			9.609	7.177	39.115	10	10.465		77.423	90.514			36.447		54.496		24.229	78.512	142.44	12.072	57.783	98.782
	16.9231						42.134	9.482		12.058			21.653	11.903		28.734	254.955	8.238	254.269	176.045	18.916		11.115	13.092		33.644	12.056			9.024	9.567	34.044	9.667	12.482		63.959	52.837			31.914		26.923		20.067	66.791	106.593	10.586	44.559	97.543
	17.1795						43.939	13.584		13.165			12.513	9.798		24.359	244.864	9.574	247.88	183.667	16.253		9.869	13.836		32.78	9.759			7.519	8.916	33.714	11.333	11.468		64.509	25.551			28.281		15.054		19.934	62.245	62.627	11.691	29.455	83.734
	17.4359						45.866	12.018		10.551			12.241	11.874		21	214.01	10.291	229.068	187.535	14.075		11.801	12.428		33.22	12.839			12	8.891	33.984	7.667	10.062		81.608	18.513			26.383		12.759		17.222	54.575	35.032	10.165	19.527	67.309
	17.6923						43.109	9.49		11.222			12.273	11.357			180.444	9.051	201.121	183.679	17.763		12.959	10.196		36.09	13.22				9.236	36.584	8.333	11.021		102.838	12.677			29.24		10.753		19.941	38.84	23.961	8.761	14.768	57.785
	17.9487						42.955	9.699					9.716	11.16			160.124	11.162	146.253	190.203	17.65		12.933	10.348		39.483	11.111				8.512	37.692	11.667	7.269		110.426	12.601			35		12.992		19.425	26.883	18.116	10.099	13.272	60.549
	18.2051						41.414	13.388					10.872	9.999			147.897	10.044	109.975	159.578	19.022		11.304	10.686		39.26					10.817	36.819	11.333	9.231		106.536	10.606			30.76		13.93		18.118	27.863	13.624	9.897	13.075	84.411
	18.4615						53.015	10.375					13.451	9.861			140.173	12.117	84.666	129.143	19.114		9.988	9.798		36.647					11.99	36.924	7.667	9.404		80.77	11.213			23.742		14.021		14.31	43.719	12.141	7.785	11.366	111.101
	18.7179						55.969	10.63					13.182	12.248			115.92	9.901	65.108	153.391	19.229		10.442	10.755		35.082					10.561	34.539	7	8.172		48.227	11.735			21.333		14.374		11.806	48.247	13.148	8.419	11.465	106.736
	18.9744						54.401	12.733					11.657	9.116			99.574	10.769	55.599	128.102	18.893		9.151	10.332		35.718					10.765	35.063	8.333	8.222		29.948	12.406					10.996		13.111	47.043	12.469	9.667	13.788	80.131
	19.2308						53.571	9.58					12.967	9.239			93.177	8.07	49.709	28.753	16.182		9.808	12.472		39.006					8.706	38.614	9.667			20.863	13.568					12.112		20.236	51.127	11.756	8.09	13.595	66.527
	19.4872						43.775	12.213					13.136	11.014			102.554	9.645	39.843	11.98	14.048		11.863	11.019		48.624					7.564	43.389	8.667			18.595	14.267					12.11		43.928	68.643	12.246	8.982	11.489	68.787
	19.7436						20.253	12.353					8.257	11.009			97.341	12.667	27.869	11.326	19.667		12.849	9.295		56.64					8.577	50.975				17.206	15.217					13.279		55.702	80.398	9.427	7.543	9.263	71.281
	20						14.861	12.552					10.673	13.788			85.509		23.281	9.945			9.29	10.692		53.229					10.353	62.993				11.79	13.694					16.841		54.689	58.656	10.166	6.268	12.614	71.068
	20.2564						11.953	12.262					8.259	11.812			72.821		18.32	15.204			9.957	13.521		54.271					12.792	67.444				11.419	13.233					30.509		51.086	31.284	8.871	6.868	10.94	72.513
	20.5128						9.026	12.691					12.768	12.024			57.884		17.778	12.768			11.585	12.583		60.522					12.478					13.608	12.565					53.482		53.938	17.252	8.08	7.203	12.068	58.634
	20.7692						7.207	10.377					9.333	11.844			48.302		12.821	10.016			11.028	12.803		62.667					11.387					10.33	14.007					65		61.156	14.385	11.531	9.168	21.944	28.939
	21.0256						12.92	10.965						8.889			45.932		12.581	9.979			9	13.271							11.647					8	14							54.039	13.728	12	8.693	19.307	15.109
	21.2821						9	11.421									42.424		16.065	11.628				14.422							8.79					8	12.875							43.942	8.34	11.704	7.048	13.109	12.338
	21.5385							9.473									40.27		18.481	12.741				15							8.823					8	8.968							29.707	8.652	13.151	9.984	13.755	11.587
	21.7949							8.614									39.934		17.374	10.568				14.326							8.129					10.502	11.737							18.889	8.626	8.271	9.29	12.416	12.438
	22.0513							12.404									38.946		19.103	9.536				10.85							10.031					12.629	10.663							12.882	11.601	9.459	10.811	10	12.484
	22.3077							10.735									36.306		19.984	9.314				10.667							9.13					13	11.607							10.457	9.687	11.164	11.402	9.878	10.893
	22.5641							9.442									40.242		17.102	10.916											11.565					12.364	11.312							9.513	10.549	9.531	11.514	9.783	12.319
	22.8205							9.881									40.926		20.044	10.313											7.153					9.443	12.374							11.115	9.312	9.032	11.148	10.992	11.017
	23.0769							11.954									40.708		24.759	9.155											8.276					10.57	12.917							12.43	11.842	9.604	11.095	11.233	11.18
	23.3333							9.425									43.883		22.76	9.606											6.883					10.062	9.937							11.811	11.909	11.788	10.903	11.527	9.654
	23.5897							8.279									44.949		19.234	9.53											9.457					9	9.32							11.336	10.946	11.696	11.316	11.366	9.049
	23.8462							11.199									43.335		20	8.832											7.655					9	12.032							13.723	10.894	8.618	11.667	12.603	10.868
	24.1026							11.99									58.016			8.155											8.852					11.625	10.793							11.061	9.299	10.78	11.667	11.215	12.633
	24.359							9									58.535			8.81											9.765					13	10							10.47	8.934	10.387	9.027	11	9.132
	24.6154																62.641			7.313											8.195					13								10.287	10.199	9.411	10.983	11.972	11.566
	24.8718																57.989			10.767											7					13.667								14.062	10.526	11.184	12.889	13.039	10.027
	25.1282																42.155			10.614											7.238													13.837	12.84	10.096		9.475	9.201
	25.3846																34.922			8.086											7.073													9.923	13.242	9.069		9.525	12.678
	25.641																42.74			7.236											7.915													10.53	12.878	9		10.714	10.499
	25.8974																53.388			7.889											9.222													12.16	10.944	8.064		10.927	12.854
	26.1538																51.394																											7.667	9.026	11.129		10.907	13.885
	26.4103																50.831																												12.564	9.451		11.546	11.881
	26.6667																51.445																												9.48	10.277		10.17	13.981
	26.9231																55.392																												8.821	8.756		9.298	13.537
	27.1795																57.848																												9.871	10.565		10.792	14.199
	27.4359																48.829																												9.318	12.888		13.333	14.46
	27.6923																28.777																												10.873	12.682			13.138
	27.9487																16.312																												12.3	13.624			11.205
	28.2051																12.814																												11.694	10.147			10.358
	28.4615																9.872																												12.241	13.209			11.121
	28.7179																8.104																												11.855	11.403			13.843
	28.9744																11.412																												11.487	13.915			10.275
	29.2308																8.02																												11.659	12.706			12.537
	29.4872																8.045																												8.673	14.613			11.25
	29.7436																11.095																												10.921	12.389			11.961
	30																9.717																												12.444	9.071			9.6
[truncated: 2 more columns]
