# Supplementary material for: Targeting an anchored phosphatase-deacetylase unit restores renal ciliary homeostasis
Source: eLife. 2021 Jul 12;10:e67828. doi: 10.7554/eLife.67828 (PMC8291974; doi:10.7554/eLife.67828)
Supplement: Figure 5—source data 1. [file elife-67828-fig5-data1.xlsx]

## Sheet: Sheet1
		Figure 5F- Percent ciliated cells measured in wildtype IMCD3 treated with DMSO or cytochalasin D for 4 hours.
		WT(DMSO) cells	WT(DMSO) cilia	WT(DMSO)	WT (CytoD treated) cells	WT (CytoD treated) cilia	WT (CytoD treated)
		127	15	11.81	130	40	30.76
		117	9	7.69	85	21	24.7
		162	17	10.49	90	21	23.33
		223	27	12.1	127	30	23.6
		146	19	13.01	120	28	23.33
					151	42	27.8
		775			95	45	47.1
					798
