# Supplementary material for: Targeting an anchored phosphatase-deacetylase unit restores renal ciliary homeostasis
Source: eLife. 2021 Jul 12;10:e67828. doi: 10.7554/eLife.67828 (PMC8291974; doi:10.7554/eLife.67828)
Supplement: Figure 5—source data 2. [file elife-67828-fig5-data2.xlsx]

## Sheet: Sheet1
	Figure 5M-Length of cilia measured in AKAP220KO IMCD3 treated with DMSO or Cytochalasin D for 4 hours
		DMSO	CytoD
		1.434	3.158
		0.909	5.025
		1.008	3.808
		1.05	1.892
		1.486	2.581
		0.772	4.733
		1.533	4.249
		1.446	3.773
		1.28	3.38
		0.909	2.72
		1.076	2.837
		1.386	2.093
		1.26	4.169
		1.204	2.842
		1.615	2.613
		0.893	2.97
		1.285	3.012
		1.312	2.609
		2.33	4.201
		1.143	2.885
		1.179	2.253
		2.63	2.581
		1.905	2.41
		1.428	3.012
		1.542	1.94
		0.958	1.935
		1.57	2.885
		1.446	2.455
		1.17	2.448
		1.312	1.861
		1.039	2.713
		1.896	2.713
		1.167	2.597
		1.533	2.818
		0.951	2.979
		1.772	3.672
		1.614	2.482
		1.188	2.942
		1.518	2.71
		1.357	2.542
		1.755	4.981
		0.937	2.286
		1.034	2.081
		1.426	1.697
		0.902	2.942
		1.189	4.788
		1.069	3.652
		0.958	3.15
		1.428	3.15
		1.428	1.652
		1.283	2.369
		1.143	4.232
		1.446	2.737
		1.585	2.818
		1.594	2.97
		2.142	2.253
		1.631	1.935
		1.664	4.326
		1.398	2.758
		1.188	2.945
		2.017	2.856
		3.869	2.194
		3.533	2.743
		1.496	5.608
		1.271	2.761
		1.614	2.842
		1.748	2.842
		1.503	2.791
		1.015	2.379
		1.224	2.424
		1.026	2.1
		0.829	2.842
		0.845	3.715
		1.304	4.161
		1.143	3.643
		1.605	3.873
		1.607	4.123
		1.623	3.233
		1.447	2.085
		1.026	7.335
		1.127	4.008
		3.263	4.473
		2.262	1.793
		1.691	2.003
		1.391	1.682
		1.814	3.317
		1.683	2.197
		1.594	2.081
		2.101	1.652
		1.188	2.379
		1.489	1.575
		1.28	4.227
		1.268	3.474
		0.759	2.492
		1.026	3.012
		0.921	2.007
		0.744	4.732
		0.939	2.116
		1.026	2.942
		2.032	2.66
		2.598	1.935
		1.874	1.97
		1.475	1.905
		2.032	6.642
		1.751	3.257
		1.969	1.755
		2.205	1.918
		1.604	2.535
		0.958	1.682
		1.399	2.197
		1.758	2.116
		1.533	2.326
		0.252	2.02
		1.022	1.905
		1.092	1.953
		1.039	4.08
		1.069	2.372
		1.13	5.254
		1.782	2.003
		1.538	1.797
		1.396	2.455
		2.054	2.465
		1	1.736
		1.574	3.059
		0.956	2.535
		1.173	1.953
		1.193	3.357
		1.218	2.257
		1.05	2.257
		1.165	2.209
		1.275	1.806
		1.797	2.178
		1.616	4.953
		1.218	2.676
		0.956	2.693
		0.698	2.433
		0.587	2.072
		1.657	2.884
		1.272	2.156
		1.15	3.58
		1.805	2.34
		1.165	2.848
		1.283	3.309
		1.093	2.54
		1.218	2.801
		0.807	2.791
		1.237	3.139
		0.88	4.006
		0.743	2.016
		0.547	1.51
		1.087	2.128
		1.182	2.085
		1.251	2.1
		1.799	2.424
		1.05	3.613
		1.705	3.931
		1.139	3.097
		3.081	3.606
		1.614	2.595
		1.739	1.817
		1.639	6.83
		1.15	6.154
		1.193	6.838
		1.41	1.2
		1.434	3.035
		0.934	1.845
		1.524	3.87
		1.4	5.397
		1.477	5.302
		1.765	3.658
		1.324	3.935
		1.173	5.589
		1.069	3.691
		1.729	4.072
		1.229	3.965
		1.1	6.822
		2.199	5.442
		1.426	6.693
		0.854	1.667
		1.061	8.096
		1.338	4.426
		0.808	7.041
		1.314	3.537
		1	5.409
		1.518	7.855
		1.334	5.853
		1.24	3.44
		0.799	3.088
		3.372	4.054
		1.97	4.703
		1.272	8.624
		1.173	6.156
		0.905	7.254
		0.965	6.88
		1.45	4.644
		1.391	2.541
		2.347
		1.037	8.731
		0.956	6.527
		0.914	6.435
		1.358	8.629
		1.152	6.002
		1.558	5.31
		0.922	2.845
		1.122	5.266
		1.267	4.65
		1.173	4.617
		1.69	5.566
		0.991	2.239
		0.836	3.857
		1.982	2.479
		1.639	2.822
		1	2.123
		1.322	1.515
		1.229	3.875
		1.15	4.163
		0.821	4.626
		1.562	2.684
		1.501	2.162
		1.115	5.2
		1.378	2.229
		1.642	3.808
		2.032	4.013
		2.892	3.976
		1.391	6.244
		1.282	2.812
		2.333	2.463
		1.043	2.103
		0.997	2.952
		1.76	5.68
		1.351	2.762
		2.237	3.488
		1.114	1.906
		1.898	2.768
		1.233	6.827
		1.209	9.791
		1.147	8.57
		1.33	7.811
		1.15	7.616
		1.762	8.516
		1.968	4.134
		0.956	3.976
		1.187	6.027
		2.485	2.134
		1.898	9.033
		0.862	3.644
		1.951	5.222
		1.569	4.205
		1.797	2.538
		1.402	4.633
		1.209	7.716
		1.882	5.947
		1.224	6.045
		2.407	3.3
		1.282	2.738
		0.693	2.911
		1.092	7.141
		1.187	4.65
		1.034	3.507
		2.258	2.111
		0.735	3.329
		1.729	3.089
		1.338	7.111
		1.456	4.753
		1.571	4.707
		2.564	1.56
		1.19	3.173
		3.089	3.176
		3.021	3.875
		2.123	3.266
		1.262	2.333
		2.55	2.465
		1.548	8.461
		3.191	6.598
		0.788	6.437
		1.147	8.285
		0.967	6.598
		0.956	3.935
		3.054	4.859
		0.872	3.738
		1.475	3.296
		1.14	4.679
		1.04	2.364
		3.463	7.751
		1.797	1.841
		1.233	3.024
		3.504	2.726
		0.872	1.99
		1.456	4.11
		4.071	2.449
		4.565	3.373
		2.492	6.899
		4.83	3.13
		0.635	3.718
		0.712	2.466
		1.973	2.071
		2.395	5.439
		1.973	3.338
		1.402	7.796
		1.679	5.494
		1.544	2.179
		1.622	4.666
		0.933	6.437
		3.946	2.032
		4.969	4.274
		3.077	4.292
		3.371	6.282
		3.096	7.595
		2.087	2.639
		2.065	6.796
		2.736	6.369
		4.899	8.722
		1.522	3.058
		1.882	3.181
		1.642	3.077
		1.522	4.054
		1.541	2.248
		4.603	6.367
		3.406	4.882
		2.142	3.738
		3.795	3.876
		2.3	5.91
		2.587	2.695
		3.243	3.644
		2.222	2.191
		1.415	3.698
		1.41	3.135
		2.463	3.457
		2.587	5.695
		2.058	3.738
		1.642	4.105
		1.906	4.667
		1.632	2.103
		1.544	3.365
		1.813	4.993
		3.212	1.94
		2.08	2.838
		2.83	1.906
		3.461	3.082
		2.587	5.109
		2.762	1.586
		2.087	2.067
		2.003	2.003
		2.311	5.1
		1.672	4.159
		1.632	6.333
		5.195	6.492
		2.538	5.664
		3.733	9.652
		5.629	7.785
		2.055	3.436
		3.546	5.835
		3.45	4.324
		1.822	1.586
		1.799	2.881
		2.692	2.134
		2.134	3.825
		2.176	3.365
		1.799	2.364
		1.269	4.111
		2.239	3.914
		2.122	5.785
		1.923	2.206
		1.672	2.311
		1.72	8.108
		1.622	4.298
		1.363	2.564
		1.285	4.565
		1.949	7.828
		2.64	8.676
		1.387	4.932
		0.764	6.286
		0.88	3.524
			4.103
			3.976
			3.626
			2.162
			6.899
			5.286
			4.879
			6.838
			7.214
			3.213
			8.718
			5.186
			7.467
			7.552
			7.027
			6.196
			4.565
			5.718
			13.456
			3.098
			6.538
			6.672
			3.981
			3.698
			4.862
			4.063
			8.205
			6.165
			4.382
			6.008
			4.728
			5.324
			4.368
			3.52
			7.398
			11.2
			7.298
			8.855
			3.96
			7.019
			5.871
			5.676
			3.607
			3.284
			5.835
			7.547
			4.376
			4.728
			5.664
			3.385
			2.124
			1.541
			2.461
			3.343
			3.213
			2.907
			2.55
			2.651
			3.72
			1.822
			1.672
			1.961
