# Supplementary material for: Targeting an anchored phosphatase-deacetylase unit restores renal ciliary homeostasis
Source: eLife. 2021 Jul 12;10:e67828. doi: 10.7554/eLife.67828 (PMC8291974; doi:10.7554/eLife.67828)
Supplement: Figure 5—source data 3. [file elife-67828-fig5-data3.xlsx]

## Sheet: Sheet1
		Figure 5T- Percent ciliated cells measured in AKAP220KO cells treated with DMSO or Jasplakinolide for 1.5 hours.
		DMSO	Jasp
		98.4	43.9
		96.15	32.35
		98.5	22.85
		100	45.16
		98.9	44.18
		100	29.72
		93.5	36.66
		73.9	33.33
		89.6	40
		85.4	48.27
		97.33	45.7
		96	38.46
		90	56.52
		97.8	47.16
		99.62	64.28
		90.42	48.07
		96.7	44.82
		98.9	68.96
		100	55.44
		98.9	60.19
		100	55.69
		85.5	59.75
		87.5	53.73
		91	61.22
		99	33.63
			39.63
			36.28
			44.44
			56.5
			47.16
			64.28
			46.36
			55.44
			60.19
			57.8
			60.8
			59.75
			33.63
			39.8
			56.7
