# Supplementary material for: Targeting an anchored phosphatase-deacetylase unit restores renal ciliary homeostasis
Source: eLife. 2021 Jul 12;10:e67828. doi: 10.7554/eLife.67828 (PMC8291974; doi:10.7554/eLife.67828)
Supplement: Figure 6—source data 1. [file elife-67828-fig6-data1.xlsx]

## Sheet: Sheet1
		Figure 6H- Primary cilia length from live cell experiments in the three cell types
		Wildtype	AKAP220-/-	AKAP220-ΔPP1
		5.845	3.062	5.78
		6.48	2.831	7.82
		2.864	3.471	3.791
		1.883	2.492	4.584
		1.81	2.049	4.585
		1.67	4.753	4.688
		1.682	5.396	5.585
		3.107	4.13	3.683
		2.899	2.718	6.547
		1.242	6.123	5.988
		1.522	4.968	4.143
		1.976	3.116	5.337
		1.814	5.278	4.976
		2.437	4.527	5.853
		1.755	4.866	3.902
		4.486	2.082	5.653
		1.442	4.58	6.239
		0.967	5.242	5.406
		1.805	4.04	6.009
		1.265	6.587	5.81
		2.849	7.22	4.374
		3.116	4.476
		2.065	4.039	5.766
		2.828	4.142	6.335
		2.332	3.952	3.165
		1.503	5.545	4.252
		0.788	3.729	3.091
		2.407	3.542	6.18
		3.952	4.738	3.208
		2.699		4.922
		2.645	4.148	4.336
		2.014	4.886	6.3
		3.264	5.445	2.707
		2.275	8.777	4.974
		3.296	3.466	2.56
		1.67	2.492	4.801
		1.024	3.793	4.083
		1.588	3.84	6.56
		3.176	4.412	4.658
		1.369	5.022	5.313
		1.539	4.036	2.794
		1.649	4.858	3.216
		3.249	5.37	3.124
		3.066	4.007	3.844
		3.451	4.425	4.935
		2.263	3.632	5.555
		1.76	4.174	5.571
		3.509	2.321	5.794
		2.605	4.306	4.795
		4.186	2.828	5.117
		3.129	3.524	4.407
		1.488	3.952	5.664
		3.847	6.523
		2	3.112	3.614
		3.677	5.378	6.077
		2.841		3.927
		2.241	6.504	4.696
			3.186	3.801
		4.75549	5.476	1.976
		3.41025	4.486	3.284
		5.83936	3.136	3.582
		3.40993	2.755	2.8
		3.16682	3.873	3.699
		3.55624	4.143	2.612
		7.12783	4.33	3.477
		3.4435	3.774	5.122
		3.36968	4.365	2.987
		3.76862	3.94	5.37
		3.66034	5.766	2.332
		3.26943	4.352	2.759
		4.50016	4.161	2.616
		6.99779	3.888	2.855
		9.952	5.043
		8.71354	5.445	4.377
		7.06453	8.89	4.049
		4.44821	2.674	2.561
		3.13457	4.152	3.901
		9.66138	3.681	3.057
		3.9314	4.377	4.904
		3.28765	5.241	4.227
		7.212		3.935
		4.245	9.46571	4.327
		4.63873	14.0421	3.225
		3.42058	6.0498	4.365
		5.01748	3.87529	3.149
		4.58388	12.4802	3.842
		8.6062	5.43421	3.242
		5.14003	11.9968	6.148
		5.19591	11.9837	8.757
		5.32186	13.0268	4.418
		6.83533	12.3152	3.157
		8.81174	9.18803
		4.2759	4.72814	7.37728
		4.37715	14.8479	17.6722
		5.94652	5.94344	4.72175
		4.54647	7.89966	18.1904
		4.51609	21.2712	6.12118
		5.67467	3.94145	5.02992
		5.05959	17.6919	6.7152
		4.95116	7.80335	4.55328
		2.26718	22.5489	12.9163
		5.5758	9.33161	5.00658
		5.68033	7.71792	8.63928
		3.93963	5.03856	4.47456
		3.13011	5.39368	14.1348
		4.83591	3.59452	5.41649
		5.03628	7.42782	5.7073
			3.65183	6.11018
			24.7269	3.74693
			11.717	12.9997
			12.2189	5.09592
			5.40808	4.79476
			4.08831	11.3059
			6.49063	9.55518
			11.4124	9.16587
			3.90627	3.87073
			10.4023	9.44327
			4.7229	10.2037
			13.3055	8.65152
			4.56669	14.0715
			6.84482	4.05296
			10.0324	14.6926
			4.44175	10.1659
			3.8274	9.4085
			5.78938	7.57957
			3.65281	9.12393
			8.25238	6.11785
			6.7979	4.94191
			23.3816	4.23077
			3.83492	4.90365
			14.3722	10.8834
			11.6325	15.1984
			3.89804	4.69338
			4.86401	4.85504
			8.44199	7.07875
			6.27588	8.26965
			7.16373	8.25159
			17.3611	3.77888
			11.7101	4.1636
			9.003	4.10963
			19.5806	6.34438
			9.15224	5.8102
			5.12301	8.15227
			11.0623	8.39472
			9.402	6.16041
			10.7988	20.6457
			13.0708	11.3734
			9.32825	12.7676
			4.00447	11.7974
			9.01652	13.725
			9.15522	21.7757
			9.58431	3.91646
			7.70622	7.90273
			4.58411	4.71971
			9.3866	3.61463
			4.07334	12.4311
			13.1924	10.5008
			17.5712	4.63149
			9.34117	6.35194
			22.9512	3.86739
			5.48286	8.11908
			4.14827	3.97611
			9.19509	4.61408
			11.2013	4.41017
			8.47842	6.99932
			6.06212	13.4117
			5.4614	19.3532
			11.5035	13.7905
			7.22529	10.3248
			6.65656	11.101
			6.25849	12.0474
			4.72114	18.1223
			16.9022	10.5521
			4.49702	15.6979
			4.05557	5.48729
			9.69065	12.7113
			8.7067	7.92571
			9.41704	18.8388
			3.85675	5.27546
			4.66153	5.74743
			5.67943	5.24
			5.43582	5.10516
			4.32288	9.13274
			3.893	8.4996
			5.73982	12.177
			6.0603	4.57796
			4.85301	5.84305
			21.4341	9.88287
			4.40801	4.8924
			3.62123	3.85672
			6.15938	8.556
			4.25069	5.33823
			3.96649	4.9614
			3.96463	6.87387
			10.6721	5.86112
			16.9198	3.84918
			14.3495	6.53748
			6.58477	6.24155
			6.99637	6.86653
			10.8017	5.69908
			9.71038	6.44454
			10.6576	6.31038
			10.8235	3.9626
			5.31316	14.3281
			5.13961	12.3265
			9.30585	4.54677
			8.37833	4.08828
			9.48142	26.8139
			4.89952	4.96635
			4.68031	9.2488
			11.3029	18.3041
			6.58434	12.9126
			8.63372	8.20214
			5.33172	12.4468
			5.08896	11.8309
			6.77712	17.6828
			11.7556	5.80655
			6.93325	3.89168
			8.12676	5.17922
			9.74464	6.23723
			8.59151	5.36729
			6.5263	7.44832
			17.1757	18.6543
			10.7384	8.62833
			15.5576	21.4319
			14.8873	24.4862
			10.1015	3.88952
			12.3365	4.88525
				5.44643
				6.86425
				5.28272
				6.20242
				6.85134
				5.2662
				4.30647
				8.72072
				10.167
				5.00068
				6.56235
				3.95452
				5.16639
				6.93922
				7.08875
				5.33687
				7.4602
				15.043
				5.04939
				5.47295
				5.14634
				5.06401
				3.67345
				7.37195
				13.6471
				13.2916
				7.26321
				7.81596
				4.57781
				11.1136
				15.2171
				10.4566
				4.12991
				8.85722
				5.55622
				16.8377
				13.9771
				16.4184
				3.63332
				8.04692
				10.722
				4.23211
				5.91713
				4.65119
				5.15093
				8.86749
				9.93193
				11.3818
				4.51829
				9.74219
				5.76052
				4.87645
				7.81165
				10.4313
