# Supplementary material for: Targeting an anchored phosphatase-deacetylase unit restores renal ciliary homeostasis
Source: eLife. 2021 Jul 12;10:e67828. doi: 10.7554/eLife.67828 (PMC8291974; doi:10.7554/eLife.67828)
Supplement: Figure 6—source data 2. [file elife-67828-fig6-data2.xlsx]

## Sheet: Sheet1
		Figure 6N- Length of primary cilia in kidney on a chip device
		WT	AKAP220-ΔPP1
		2.7	10.15
		4.49	14.18
		2.7	8.52
		2.41	7.26
		2.61	11.35
		2.7	7.93
		2.61	12.75
		3.15	8.86
		4.23	8.4
		2.99	17.72
		2.99	10.99
		4.04	10.1
		2.7	8.72
		1.8	9.14
		2.72	16.91
		2.8	8.92
		2.07	10.19
		1.98	8.95
		2.9	10.17
		2.4	9.22
		4.35	5.56
		3.47	12.96
		3.09	11.63
		3.28	6.12
		3.26	12.8
		4.51	10.19
		4.18	10.01
		4.22	11.03
		4.82	12.1
		6.23	18.25
		4.28	9.34
		2.85	7.24
		2.21	15.46
		3.47	8.95
		1.73	14.85
		4.56	6.58
		3.42	10.02
		2.66	11.17
		3.88	13.53
		2.92	13.71
		2.47	11.72
		4.08	11.77
		4.3	8.38
		3.8	10.68
		4.57	7.02
		2.45	6.49
		1.92	10.84
		3.06	8.33
		3.37	15.59
		4.42	7.39
		2.38	15.27
		2.47	17.34
		2.04	10.77
			13.3
			10.04
			10.19
			15.64
			12.96
			14.54
			13.58
			16.12
			12.99
			14.07
			13.02
			16
			14.47
			13.22
			12.43
			15.22
			13.08
			14.98
			15.53
			12.05
