# Supplementary material for: Targeting an anchored phosphatase-deacetylase unit restores renal ciliary homeostasis
Source: eLife. 2021 Jul 12;10:e67828. doi: 10.7554/eLife.67828 (PMC8291974; doi:10.7554/eLife.67828)
Supplement: Figure 6—source data 3. [file elife-67828-fig6-data3.xlsx]

## Sheet: Sheet1
			Figure 6S- FRAP of Arl13b-GFP in primary cilia
		milliseconds	Wildtype (n=63)
		-40	95.7326	100	99.7211	99.8703	99.6942	100	99.6264	99.4631	100	98.6092	100	100	100	100	100	99.7972	100	100	100	98.9537	99.8747	99.8302	100	100	100	99.633	90.874	99.6805	99.8783	100	100	99.4057	100	99.375	100	100	100	100	99.8039	100	100	99.8322	100	99.6291	100	99.6805	100
		-30	98.0797	99.878	99.8605	99.7405	99.8471	100	99.8755	99.5974	100	100	100	99.8565	99.5298	100	99.7368	100	100	100	100	99.701	100	99.6604	100	99.729	99.8536	99.8165	90.874	99.8403	99.8783	100	100	99.7028	99.8458	99.6875	99.8195	99.8795	100	99.8428	100	99.7503	100	99.6644	100	99.6291	100	99.8403	99.729
		-20	99.0398	99.878	99.8605	99.8703	99.8471	100	99.8755	99.8658	100	100	100	99.7131	99.373	100	99.8684	100	100	100	100	100	100	99.8302	100	99.729	99.8536	99.8165	90.874	100	99.8783	100	100	99.7028	99.8458	99.6875	99.8195	99.8795	100	99.8428	100	99.7503	100	99.8322	100	99.8145	100	100	99.729
		-10	100	99.7561	100	100	100	100	100	100	100	100	100	99.7131	99.0596	100	99.8684	100	100	100	100	100	100	100	100	99.729	99.7072	100	90.874	100	100	100	100	100	99.8458	100	99.8195	99.759	100	99.8428	100	99.6255	100	100	100	100	100	100	99.729
		0	0.357284	0	0	0.36662	0	1.90953	0.374592	0.815354	0	15.1599	1.90148	0	0	0.740526	0	0	0	0	0	0	0	0	1.83445	0	0	4.57175	2.49839	0	0	1.09421	0	1.04306	0.381357	0	0	0	0	0	0	0	0	0	0	0.400438	0.0639508	0	0
		10	0	0.758659	1.97545	0	2.08716	3.05122	0.822283	2.49894	3.48571	17.1231	2.85543	1.35179	1.86834	2.87379	1.27329	3.12921	1.03648	12.5344	1.52975	3.94544	1.34361	2.01307	4.07932	10.494	2.43148	7.08298	15.9528	1.64808	1.07968	0	0.283077	8.52426	0.480976	8.11375	2.22455	0.204699	7.84329	1.13616	2.52706	0.578527	2.73126	1.88138	1.76818	1.21319	1.27573	1.59201	9.33062
		20	1.15763	1.29061	2.58061	0.752959	4.30336	1.85995	0.269113	1.94598	5.11192	16.2709	0.944935	2.09053	3.77022	1.75294	2.88632	2.96957	2.62692	19.3914	3.45563	0.640658	0.724687	0.113922	0	6.68835	3.09619	7.74235	24.6116	1.51853	3.27859	3.61846	4.63516	7.05893	0	1.3125	5.97004	1.23711	9.81882	1.54686	3.99745	0.23196	0.850518	0.969966	1.34563	4.1906	4.24379	1.56629	5.36558
		30	1.39457	1.73451	3.26151	1.539	7.02615	0	0.866617	1.84666	6.25396	7.01391	3.73832	2.27834	4.01959	1.05561	3.10066	5.07485	3.00602	16.5959	4.53134	2.13797	1.10138	0.606112	1.36037	8.74743	4.21801	6.02336	10.2328	2.6385	2.15547	4.74172	3.9956	8.53466	1.36181	1.95875	4.48592	0.667952	12.0624	3.36038	3.69686	0.505368	3.22733	4.3344	3.8521	3.29254	1.93189	2.61358	7.42656
		40	2.68993	1.87122	4.43291	2.80167	8.46544	0.43997	0.458401	1.53662	7.19091	26.6867	1.61759	1.96341	5.53213	1.65132	3.30882	6.54726	3.50543	16.4163	5.12342	1.76278	0.446992	2.31851	2.25324	6.77696	4.62533	6.43388	11.9023	3.45479	2.7882	5.36804	7.89451	13.8049	1.13559	7.47656	4.77076	1.20578	14.7346	2.79387	6.70314	1.76055	3.04286	3.15403	4.20157	3.76549	7.38972	3.41629	5.7729
		50	2.90148	1.98024	4.21757	3.4655	4.33394	2.53149	0.440842	1.88827	8.81617	22.0323	1.69818	2.96801	5.48009	0.948364	3.01671	6.05416	5.25443	10.957	6.11162	3.73812	1.15351	2.06044	2.00111	14.9179	6.94217	6.17568	10.6975	5.54744	3.50791	5.52528	8.86242	9.00538	1.5208	9.63406	7.02256	1.12229	17.2261	4.82925	6.36412	1.89051	7.26439	1.33456	2.57395	2.0276	8.68025	5.68243	14.0599
		60	2.91962	2.82646	4.61506	4.888	4.1578	5.536	0.101244	2.48861	9.69693	21.057	1.58327	2.58709	5.77727	0.899252	4.85645	4.79148	4.1085	11.0955	7.27271	5.04918	1.34712	1.9163	4.07298	16.6033	7.29004	7.12996	0	3.64569	2.90633	3.25525	7.19231	13.0787	0.0895951	9.17812	4.84495	0.908916	15.7014	4.29937	7.90118	1.27603	11.7319	3.92483	3.34913	3.4934	13.2913	3.69073	16.3569
		70	4.12589	2.64122	5.21967	5.37929	5.11147	3.18812	0.512324	3.07754	10.4707	41.8373	1.49141	3.6825	6.95141	1.46848	4.34974	6.80162	5.06092	12.1244	7.54665	3.80374	1.09987	2.86248	3.85534	18.1504	7.5407	6.98315	12.048	4.74457	2.841	2.52426	7.4233	8.06841	0.0294538	5.2275	5.96101	1.02145	17.32	4.88852	9.24078	3.08752	11.1211	3.73658	3.88531	0.134283	13.542	4.6131	17.3238
		80	3.75282	3.2472	5.74561	5.79508	5.44664	3.30831	0.767863	2.25065	10.977	27.0323	3.01384	2.78278	5.57727	2.65338	4.85632	3.18621	6.01606	15.6873	8.70018	5.36069	1.38333	6.76231	9.5251	21.1599	7.33939	7.08848	26.3816	5.26949	3.19002	4.79741	8.0611	12.6273	1.05186	7.26844	5.54964	1.03157	18.4384	6.13475	8.92922	2.46117	12.7172	4.85856	3.61224	1.21856	14.7587	5.27348	19.6469
		90	5.1507	3.4611	6.93264	5.79119	7.28884	2.92672	0.782309	2.28863	11.7433	19.4586	1.27233	2.9703	4.16395	2.37439	5.08053	3.17911	6.33719	16.4317	9.07165	5.14619	0.604762	4.25874	3.07103	17.994	8.14436	7.47313	10.9875	9.59217	2.96022	5.39973	7.22132	5.00134	0.957789	7.105	5.56173	1.12614	14.6452	7.89387	8.9549	2.67653	17.171	3.59211	6.89038	2.25852	11.9574	9.64649	16.3959
		100	4.99163	3.69512	8.42064	6.03054	5.87339	2.63515	0.0640093	0.858034	11.6645	32.9788	2.297	3.0561	5.58056	2.57838	4.97829	3.43144	6.85478	26.291	8.74208	9.48729	0.648496	5.67267	6.89492	23.1566	8.83426	5.76313	7.18991	11.0847	3.05462	6.59764	8.39253	5.46938	0.758243	5	6.69783	1.26916	16.4351	7.01179	14.12	2.00112	15.959	5.11779	2.55105	2.8448	9.64732	11.0415	21.126
		110	5.24842	3.98854	7.44826	7.0693	3.35581	3.19459	0.998994	2.52015	12.7264	23.8122	0.642667	3.69813	5.43966	1.4849	4.74711	3.09817	7.98926	32.2475	9.57095	8.51315	1.17632	4.33158	6.78103	18.2046	9.8672	6.0452	17.1174	9.47843	2.50414	7.20524	7.61802	19.8912	1.20098	8.27219	7.02563	1.17771	20.5661	10.1627	15.9257	3.16604	12.8035	5.01225	6.08287	1.54147	3.89175	9.57077	16.3951
		120	4.07991	4.45049	7.67629	8.17759	3.00703	2.39765	0.675585	3.21176	13.7349	24.1978	0.312667	3.11076	6.22085	1.7525	5.01921	5.57221	8.95466	23.4317	10.2129	10.4722	1.94762	3.7652	6.88072	14.8154	10.3056	7.04628	14.6764	11.7604	3.12397	2.65389	12.7879	9.71769	0.461854	7.69187	5.1787	1.12313	25.7511	7.74418	14.6225	3.61648	18.8785	7.72366	3.97185	1.41962	9.23319	11.7401	12.9732
		130	5.17854	4.69244	7.15077	8.16254	4.46254	3.80613	0.838348	3.39308	14.3545	31.3634	1.6259	3.42066	6.30862	2.03904	6.61224	4.13327	9.59728	28.2208	10.0717	9.00314	2.01078	4.09711	2.34025	15.5396	12.2344	5.25755	9.08287	13.6826	2.40681	3.02047	12.4147	13.9532	1.3467	4.14937	6.71065	1.89494	30.1336	7.2173	15.7918	3.57503	25.2244	6.39916	6.28969	1.26493	10.7939	13.8529	14.3206
		140	5.98102	5.03085	9.18187	8.53604	6.08211	2.4201	0.462262	3.21739	14.658	29.2333	3.37521	3.69067	6.83276	1.12484	6.00132	8.57079	10.3952	27.6416	12.0729	12.2825	1.89449	3.54941	4.3969	21.8027	12.9857	5.71267	13.7409	10.1952	2.80122	4.48893	11.8349	17.1885	3.20353	6.28062	7.19278	1.60229	26.0934	5.4294	16.0012	3.18914	22.1418	7.18121	7.61084	0.26801	18.3701	10.2297	20.2106
		150	4.71777	5.00415	8.6	8.26879	8.73165	4.5639	2.11019	4.13918	15.1982	25.9419	2.54484	3.27217	8.53966	1.33712	6.65395	7.91055	10.339	30.2643	11.1794	9.29402	1.62594	3.06231	5.50234	23.1851	12.3675	4.03423	17.1225	11.8313	3.91667	5.13974	13.7042	8.12636	2.09338	7.11187	8.2704	1.11675	28.8713	8.15786	17.072	4.66067	18.7863	5.9943	6.61696	3.57186	18.8412	11.6704	22.2743
		160	5.87391	5.46159	9.85397	10.3389	4.96223	3.28154	1.05877	3.08935	16.9591	27.5143	1.69697	3.61765	7.90517	2.06108	7.27737	4.17039	11.4535	36.9235	11.8467	9.77877	1.98872	4.21562	6.54056	20.0043	14.2865	7.82952	20.3746	8.52284	3.69465	4.0525	17.0387	10.0294	1.70878	5.70062	7.42329	1.60699	24.9518	8.06557	16.1169	3.62534	22.9685	7.22768	8.99318	0.0428445	20.9929	8.67093	20.1176
		170	5.71089	5.59963	8.95983	10.9405	6.89771	3.00146	0.179824	3.12183	16.7135	37.3282	4.61046	3.09928	7.56019	0.569522	5.95013	5.10933	11.9537	37.7271	12.1102	11.5628	1.62193	4.58913	3.94463	20.5789	16.4837	6.01088	29.5571	7.50639	4.66667	6.82018	19.2699	11.7426	3.57887	1.86812	9.03213	1.88157	24.5496	9.6783	15.4382	4.5166	19.8348	5.2802	4.67517	0	11.8605	7.48195	19.3854
		180	6.82243	5.81354	9.20042	12.3343	2.96498	3.97644	0.984922	2.65423	17.2074	29.9906	5.83253	3.57044	9.23135	1.7633	5.77737	5.16511	11.1022	33.4937	12.197	11.7538	2.57293	3.66978	4.72666	15.2837	16.5602	6.48949	26.5731	11.0498	2.27202	3.99752	14.5191	13.607	3.5838	11.0622	9.3926	2.37361	29.0089	8.55377	22.4427	4.21323	25.4379	7.46326	9.2236	2.16467	14.6943	10.8625	14.752
		190	7.00443	5.67524	10.457	14.3768	0.167584	3.98111	1.05142	2.40352	17.6308	24.3835	2.37447	3.2363	9.28119	0.980021	6.46263	5.98174	12.192	32.9213	12.4632	13.9991	2.04185	5.48336	9.71027	21.2951	16.8029	5.33627	23.7634	13.0796	2.73005	3.96511	14.3954	5.5401	3.37161	10.6344	9.31986	2.78639	28.0386	9.86918	21.9602	4.13396	23.2292	7.54396	7.13217	1.70525	16.0206	12.9665	20.0984
		200	8.21156	6.0061	10.4431	12.9238	1.63853	4.5418	1.34357	2.1477	18.4228	32.614	6.89567	3.40846	8.56129	0.743189	5.75329	6.3071	12.1924	28.8615	12.5651	14.4221	1.64837	4.45586	4.69495	26.0911	16.099	8.03157	26.439	11.5292	3.34148	4.56335	15.8459	8.02562	4.94947	8.1225	9.15758	2.1659	34.4252	9.66714	19.1275	3.79613	25.5315	9.71258	4.70682	2.95516	9.22661	11.4246	25.3447
		210	8.6096	6.10878	10.7735	14.0048	2.63807	2.94703	1.15964	2.1979	18.5325	20.605	5.24775	3.30617	8.31803	1.6383	6.66987	2.3568	13.2342	27.8923	13.1646	9.73991	1.50865	4.04754	4.42151	22.4564	18.3182	8.39622	27.0003	13.2701	2.58856	2.97005	13.1066	15.8334	4.45925	6.64719	8.74657	2.58783	32.2833	9.80016	22.288	3.91223	21.2886	9.41946	6.32745	3.42329	16.9015	13.124	21.9623
		220	8.53695	6.42951	9.39414	13.5443	5.23731	3.1662	0.628263	1.86585	19.2831	29.0991	3.8735	3.69857	7.67727	1.42173	5.47579	5.2288	13.6455	22.2629	13.7264	10.7018	1.87995	7.15195	0.483725	17.2168	16.3154	7.59939	31.2672	8.87061	3.08151	3.90846	15.6921	15.4795	5.13792	11.1841	12.0161	3.45	27.4271	10.8541	21.0759	4.57291	22.1294	10.0765	6.2965	3.73953	14.5327	8.87444	16.5778
		230	8.53716	6.62732	10.5485	12.9856	2.9263	3.80864	0.278079	1.72936	19.8898	29.251	2.779	3.32697	6.81442	0.873809	6.01816	4.7712	13.5799	28.3783	14.1884	13.8084	1.00451	8.78998	5.201	19.977	17.0698	6.07786	29.3635	12.5503	4.05523	1.48983	12.0844	8.12249	3.9337	11.2934	11.4175	4.41614	32.8096	12.3508	24.5439	3.47191	23.1128	10.7183	8.49738	4.21972	17.7917	12.742	19.4523
		240	8.84334	6.88415	11.6951	15.2545	4.137	4.11154	0.426397	1.88276	20.9844	32.3077	3.11749	3.4363	7.94169	1.16375	6.26184	4.81116	13.8067	31.6294	14.4664	13.6655	1.24962	10.163	5.68954	19.6878	15.77	7.62435	36.6941	10.4984	4.14635	2.99646	15.8811	4.5856	5.31325	13.4291	10.9013	3.3359	33.8188	12.6939	25.8253	4.83283	27.1224	11.2191	2.4701	4.9529	24.5419	10.2819	19.1759
		250	8.72503	6.74378	12.6944	15.5271	5.21636	3.20141	0.556159	1.07425	20.807	38.9423	4.51409	3.45452	10.2193	1.21449	6.77	6.24381	14.9785	32.0434	15.1915	9.74499	1.73083	8.01087	7.16786	15.3759	15.3483	3.39321	30.0558	10.8802	3.1545	1.32395	15.5725	0	5.66747	13.7487	10.2551	4.25602	30.2696	12.6288	23.4688	5.37678	29.846	13.0013	2.00035	1.91613	23.1644	10.7602	14.2615
		260	8.70242	6.7861	12.3619	17.8665	6.63823	2.37753	0.2061	1.5079	21.1643	41.3651	2.40809	3.15022	8.22398	1.79421	7.02579	4.42272	15.4702	25.0154	15.3239	13.8958	1.59674	11.4063	8.13886	11.3775	16.5874	5.50823	40.9123	12.3465	2.77105	3.94999	13.2785	9.75276	4.2139	11.6341	11.3731	3.40783	33.0699	17.0767	25.4457	5.44557	31.1099	13.2834	4.92028	0.614476	21.9944	12.2931	10.7794
		270	9.54052	7.04415	12.8191	17.8411	4.92217	3.70534	0.0613942	2.28205	21.7464	29.9061	3.87905	3.45337	8.11129	1.04851	6.09421	4.1503	13.9863	28.6973	15.9136	12.9389	1.20276	9.41053	11.1325	14.694	15.4239	4.21976	15.5663	11.8698	3.3017	2.87547	13.6369	9.13643	6.00179	15.4256	10.6715	3.6506	32.0593	16.7618	23.7933	4.61373	31.2451	12.3513	7.35542	2.47719	21.4124	11.8564	14.5331
		280	10.9558	7.05098	12.949	19.12	6.60214	3.1547	1.09874	3.20236	22.096	49.5452	2.97433	2.99154	8.14216	1.65975	6.87829	2.46876	14.9472	33.1231	16.2748	12.8674	2.57168	11.9857	16.5872	16.413	17.2695	5.65633	15.9472	12.101	3.42883	3.14986	17.4659	5.15497	5.99269	6.76281	10.9002	4.59458	29.3254	16.6052	24.9827	4.37316	34.9677	12.9924	7.05857	2.17821	15.9986	11.9832	16.7127
		290	11.3555	7.43512	12.8099	20.0992	7.13073	3.52012	1.48292	1.7209	22.2197	33.9329	6.38958	3.64405	8.51191	2.17424	5.99829	5.05619	14.8169	26.0045	16.3141	13.0574	1.49887	12.4689	17.8053	27.5621	17.1057	4.32143	16.1285	12.3297	4.13783	7.16827	15.6756	3.51728	8.31183	18.1112	10.6509	4.36024	29.7661	14.3093	24.4253	3.67428	38.1	11.179	8.05612	3.22706	14.961	12.3208	27.2927
		300	12.2153	8.03171	12.8039	19.1149	8.26911	4.52528	0.186549	1.96276	22.9011	37.5967	5.47792	3.88996	8.80204	0.496889	5.50026	4.78519	13.6609	30.743	16.7695	11.5407	1.67318	15.1767	22.8665	27.9325	16.3698	4.22986	15.2082	13.4819	4.35791	4.5427	15.5842	16.404	7.10839	11.895	9.23466	3.80036	27.864	16.2836	28.5794	3.90225	31.846	12.1079	10.4601	3.16697	12.6816	13.4248	26.9599
		310	10.2884	9.36134	11.8541	18.1817	6.80245	3.48239	1.06612	1.35382	23.3717	28.3077	5.93721	3.57991	9.71599	2.16684	6.54684	3.25578	13.1822	30.2285	16.4688	11.4392	1.46028	16.4078	21.2788	31.7206	17.0378	3.18859	26.4324	11.6732	4.25949	3.80379	18.1009	13.0733	6.82341	15.4606	12.2018	4.9647	38.3779	18.8365	26.561	3.59476	27.7824	15.0112	4.25315	2.60443	17.0852	11.5558	31.1366
		320	12.3673	9.1239	13.7294	18.6352	11.7448	3.48293	0.403109	4.02778	24.3626	26.2882	4.91654	3.3307	10.5867	2.12173	6.60079	3.13671	15.4776	33.6615	16.6449	11.4	1.56805	18.046	13.7731	34.3377	16.2925	5.41409	24.5994	15.1045	4.90158	3.87677	18.0007	20.7197	7.29437	13.7625	10.6433	5.98	33.0141	21.2058	25.5829	4.1191	31.1824	15.3008	7.62955	2.4286	21.658	15.1569	33.4
		330	11.9838	8.89329	12.5992	19.6567	13.032	5.30353	1.11182	4.15972	24.1113	28.1436	4.08443	3.41291	9.89969	2.76358	7.30947	7.2211	17.132	36.3389	17.2023	11.1578	1.09474	14.61	12.066	32.184	18.5767	7.20245	29.4347	14.354	5.7781	4.9777	22.1343	21.4181	9.44943	19.2512	11.4796	4.68518	36.7184	18.8186	23.7122	4.80999	35.6263	14.4035	13.0413	2.67936	11.6425	14.2324	30.9612
		340	11.2068	9.34256	15.2139	19.9948	8.61575	2.01553	1.18542	4.10643	24.7756	32.9298	4.9434	3.56055	11.4038	2.31714	7.53882	5.85619	17.7868	32.695	17.607	9.413	1.2891	12.7355	14.9019	31.7943	17.9341	4.41796	24.5974	14.3069	5.8101	4.26255	24.6127	27.7091	5.4434	17.4091	9.32491	5.13193	37.6089	19.0321	23.1367	4.90474	34.1238	12.3252	15.4684	3.84117	11.9097	13.9946	29.9314
		350	12.3648	9.55585	13.7884	18.0465	12.2859	2.55538	0.699246	1.87699	24.2889	18.9694	4.47267	3.52152	10.6031	3.20855	7.49513	8.36897	17.9851	26.0344	17.6535	5.44783	1.25576	13.7178	15.5979	24.9659	21.8202	5.76313	25.7737	14.6182	5.88406	0.292156	24.311	25.218	6.60876	16.5516	9.81029	5.26289	36.1111	23.5991	28.0567	4.13233	41.86	12.0112	13.8273	2.96109	16.2499	14.5653	24.6694
		360	13.4465	9.7811	14.0808	18.7854	9.42768	3.83146	1.00186	2.73422	24.9661	31.1453	3.61769	3.31277	11.4058	2.66536	6.70987	7.53367	16.9549	27.8991	17.3704	8.74051	1.45664	12.3621	12.0541	31.1165	22.7138	5.7178	21.4514	12.9248	5.76071	4.6613	23.0848	33.6359	5.82954	22.3253	13.3834	5.79205	33.8087	20.2803	28.9845	4.78402	36.3963	12.4977	14.5792	2.03094	15.8886	12.7612	29.2946
		370	12.3207	9.76622	15.0449	19.9406	7.0685	3.31981	1.21207	2.3807	26.0968	33.6645	4.27942	3.68278	11.7677	2.19539	6.99171	5.87769	16.725	30.1819	17.9958	10.977	1.23008	13.348	23.6214	30.135	22.8051	5.6644	35.7017	11.9581	7.08151	1.21808	21.1055	20.8627	4.92326	15.7034	12.252	5.83699	30.8405	22.5242	29.6169	4.01286	40.2928	13.4926	17.8806	1.53758	10.0294	11.912	28.658
		380	11.8136	9.94549	15.3107	20.0659	8.42003	3.46874	1.0432	4.06295	25.5684	19.3915	5.82525	3.95739	12.4707	0.499404	7.37303	5.30609	18.2505	30.491	18.1382	9.21928	1.20213	14.826	24.7149	30.9954	22.9545	6.97269	21.3427	11.9091	5.51277	4.78109	28.153	17.5974	6.61508	8.23281	12.0966	5.80867	35.3856	20.9803	30.2675	5.38664	34.5006	13.1416	19.5089	2.68845	14.0143	11.8476	30.307
		390	12.065	9.84841	12.8333	20.3643	8.59495	2.98906	0.896504	2.88696	25.7913	22.0163	3.41352	3.68293	11.816	1.8485	7.55868	6.48174	18.9907	29.8457	18.588	14.2393	2.07469	14.7163	19.522	38.606	21.5713	6.19421	23.3997	11.9887	5.60925	6.28076	24.4158	23.4849	8.08438	9.84031	13.0157	5.79952	31.8586	23.5802	31.6433	4.8799	38.0325	13.1413	18.4509	5.19606	16.2567	11.7626	36.5461
		400	11.5359	9.2911	15.6213	20.7318	9.99358	4.65966	0.964374	2.06771	25.6956	26.4652	6.67139	3.41033	13.3638	0.714639	6.75487	3.99473	20.0541	35.4828	18.7213	12.2208	1.49411	12.7725	12.0008	30.374	18.8613	7.41753	17.9204	13.131	5.03637	4.11227	23.6714	19.9643	9.15289	16.115	12.07	6.00458	31.0431	24.0593	33.5565	4.44844	37.3853	12.6612	20.7771	2.88319	24.3774	13.0054	29.994
		410	10.5207	9.96085	13.6092	22.5064	7.26101	3.75762	1.34283	3.58742	26.9004	36.5647	6.99463	3.3241	12.0306	0	6.36026	5.23935	19.2695	36.1	20.054	10.7184	1.85965	14.6535	10.9367	35.4149	17.6493	5.2135	17.6365	12.0385	5.54173	3.88205	24.444	16.7255	7.41234	21.1225	12.8955	6.26952	36.3741	23.6368	31.6198	4.18215	40.2151	9.50822	16.4717	2.24739	25.2112	11.7327	34.5098
		420	13.5628	10.4296	13.7233	22.0524	6.01988	3.53413	0.589658	3.77828	26.3872	33.1106	4.72363	3.69885	13.3976	2.48178	7.59658	3.65152	18.4943	37.7249	19.2539	13.1109	1.56604	12.7873	8.44173	35.7751	16.5758	4.6903	35.2613	12.7099	5.7371	7.09793	24.6508	13.5547	6.96159	15.7741	14.311	6.62614	35.504	23.1703	33.5614	5.30087	38.8139	10.5302	20.1187	3.33686	21.4953	12.6038	34.8493
		430	12.6142	10.3226	12.3268	22.6947	8.43807	3.58497	0.472224	2.31802	26.6909	36.9732	5.58728	3.67704	13.4732	1.50753	7.42579	3.06673	17.7346	38.3561	19.9857	12.6731	1.96817	12.9362	12.0812	35.9035	19.3613	7.04022	23.8314	13.8736	6.73869	7.77347	28.7305	30.1596	7.77457	20.1347	14.7422	7.69253	38.524	24.5192	35.6075	6.06055	35.7118	14.1216	21.7309	1.98272	25.8121	13.7853	34.6363
		440	11.5444	10.6609	13.051	23.1535	11.8986	3.83379	0.438601	4.06885	27.2813	42.6655	4.89106	3.02023	13.1484	2.08519	7.1725	4.5929	20.2725	35.248	19.0546	11.5281	1.37694	13.3475	11.7933	26.335	20.5823	7.20171	35.5869	13.6372	7.49282	6.47305	25.68	28.5275	7.74836	18.4553	14.504	6.71831	36.7365	25.2756	38.4169	5.47129	36.9812	15.8612	20.7383	5.33943	28.0561	13.7016	24.8412
		450	12.445	11.2228	15.2024	24.4422	12.5034	3.60509	1.33735	2.44902	26.3191	45.024	3.43709	3.41693	12.4889	1.41197	7.65526	6.61886	18.6638	39.3403	19.39	13.5966	1.61541	12.3761	5.50184	26.2371	20.6206	4.78518	37.6135	12.1233	6.35511	11.7352	23.8738	24.826	8.49241	18.9612	14.7403	7.24855	40.6311	25.1794	35.8435	6.51423	42.9095	14.0339	22.0108	2.76338	29.7581	12.238	24.4407
		460	13.837	10.2624	15.9734	23.4055	10.4798	5.07142	0.796754	1.82706	27.2491	40.3863	1.82834	3.20803	12.4944	1.28239	7.57974	6.1432	21.3986	39.4412	18.8028	13.8456	1.3713	12.1418	13.0882	32.7233	17.0359	6.33533	56.2978	12.2206	8.37214	10.1143	18.3736	22.0505	8.06772	18.0872	15.3574	6.61542	38.0849	21.8118	30.8269	5.39576	44.1845	15.1446	22.2156	5.89474	29.2928	12.0343	31.297
		470	14.1435	10.1801	17.3646	22.5378	10.6965	1.85438	2.061	1.16552	27.8687	42.1554	5.82612	3.59986	12.7183	1.29851	8.28539	10.5917	21.8119	38.7923	19.4011	13.7454	1.02193	10.8239	0.895665	22.2558	19.6441	6.3792	50.5686	14.015	6.47749	9.90114	22.5804	20.9367	9.62276	21.1378	14.4276	6.37578	35.8424	25.1899	29.8465	5.7422	42.2271	14.7822	28.0979	4.3757	24.3237	14.0268	20.5117
		480	14.563	10.5329	16.7121	23.6858	11.3856	2.71312	1.03797	1.12163	27.5491	27.2576	3.01159	4.07188	12.3158	1.22499	8.24053	7.50832	21.2505	33.7471	20.1722	9.59567	1.75175	9.83565	7.34466	34.5398	16.3281	5.39225	48.1743	11.4171	8.22372	11.8665	16.6248	19.5346	10.0141	17.935	14.0733	6.91843	35.8256	26.0333	32.598	5.9618	41.587	16.6708	25.5082	3.34094	31.3795	11.4687	33.1352
		490	13.9285	10.472	15.8831	24.0428	12.8252	1.72772	0.761761	1.48361	28.2179	27.5741	4.43974	3.58106	11.8494	1.07114	8.16197	5.22049	23.6256	38.4308	20.1954	10.6242	1.55376	7.22852	7.60821	37.2211	19.2637	5.82057	49.9464	13.0348	7.67433	5.77062	15.7002	15.4581	10.1057	15.4784	14.2312	7.20687	33.8906	24.2352	33.0312	6.13995	41.0493	16.201	26.2976	3.20035	22.725	13.0597	35.929
		500	15.2455	11.2191	17.1007	24.1117	10.7446	3.22549	1.43261	1.96678	28.9361	27.4242	5.96425	3.41549	11.305	1.88415	8.39092	5.35335	22.5537	31.3326	18.9146	12.2952	1.81404	9.5309	9.06446	38.2266	16.8785	5.43611	28.6631	12.3855	6.90742	8.07235	16.9347	22.7646	10.9883	18.2809	13.6897	7.63458	38.1153	21.3365	31.8706	6.01024	40.7019	14.3669	30.3788	6.52257	21.6238	12.2107	36.7631
		510	14.6956	10.3456	16.877	23.5519	10.8729	2.92008	0.344206	0.967017	29.8527	30.5469	6.81594	3.39039	12.7481	1.62055	7.55158	6.86957	22.0656	24.7597	20.3405	13.0266	0.629323	6.09304	8.11578	40.9678	19.2471	6.55886	39.5425	11.7329	7.62226	8.22623	19.6881	16.9629	10.8208	16.9337	15.8774	7.44096	35.4769	26.8701	31.382	4.90449	42.8571	15.1324	25.9837	3.64957	18.5918	11.6182	40.177
		520	14.6357	11.571	14.824	25.1186	18.8234		1.43361	2.29534	31.219	35.4245	3.09704	3.74864	13.5417	2.60856	7.33697	5.63205	21.9661	28.5217	20.4044	12.3934	2.39987	8.14958	9.76278	25.061	15.5845	7.14941	29.0639	12.3032	8.20024	3.99176	21.8965	12.8356	11.0059	16.8553	12.5699	7.76976	29.9746	26.2369	32.3594	6.4	48.188	15.3567	22.9497	3.6275	16.599	12.2486	24.1883
		530	15.0425	11.7388	17.8658	24.0279	14.7355		1.18243	1.198	31.2799	29.1565	5.69214	3.73027	14.7077	1.92898	7.14553	3.50385	23.7148	26.3724	19.7928	13.0816	2.32105	9.82615	9.88809	26.7149	17.3148	6.93396	31.2697	15.1454	10.7667	6.1372	19.809	13.5532	11.4634	16.23	14.3792	7.83928	33.1744	27.2704	32.1849	6.19663	36.0366	12.95	29.5122	1.44558	19.4386	14.8629	25.6447
		540	16.2047	12.4099	17.4594	26.584	15.9734		1.17135	1.3451	31.1372	40.2806	5.29611	3.53386	13.9812	1.97676	7.56066	5.21582	24.356	24.6009	20.8099	13.5587	1.51905	10.6531	12.0026	26.6111	18.0941	6.8244	25.3709	15.0046	10.531	5.38652	19.2974	22.6561	11.2369	18.1522	15.9937	7.20723	35.5621	27.7684	34.182	5.81511	40.0855	14.2639	23.8752	0.965578	24.9449	14.7021	25.4843
		550	18.7873	12.1591	17.0986	27.6467	20.8693		1.70484	0.866222	31.1365	32.5372	6.67382	3.58594	14.202	3.42245	6.91	5.27241	25.3237	25.1873	19.7535	13.9099	1.69687	11.3988	8.98735	20.3748	16.0637	6.48967	34.6056	12.5522	9.63455	3.66143	21.7657	22.4522	10.6004	23.4622	13.5264	7.47349	30.6976	26.0031	35.7949	5.80762	36.2511	14.5346	22.4531	3.1397	16.5886	12.5334	19.0523
		560	16.7257	12.957	17.3312	27.743	19.5928		0.647316	1.23679	31.0263	35.2072	4.88621	3.61047	13.0056	1.58934	7.38605	6.89777	25.2404	24.5633	20.5674	15.4146	2.54398	9.8129	8.21445	20.6306	16.3594	4.53504	28.0029	15.1955	8.67762	9.10149	28.9321	14.8566	10.4365	28.0781	16.3838	7.54024	38.36	28.1239	36.0112	5.53583	33.7493	16.7208	22.4563	3.5062	20.44	15.3441	19.3154
		570	15.1309	11.0678	17.394	28.4142	16.9248		1.60584	3.31832	32.2058	38.5407	0.298282	3.02367	14.1677	1.58549	7.35592	8.09858	25.3619	26.0647	21.612	15.6123	1.18296	13.7521	6.75643	23.6195	18.8334	6.79669	21.0126	14.8963	12.0342	7.39297	31.2536	23.2106	11.2006	25.4097	15.3099	7.45108	31.5746	28.6575	30.6755	4.81785	37.3427	17.494	20.8084	5.71742	24.3776	14.7518	22.4827
		580	14.635	11.1578	19.4996	28.4194	14.9063		1.27371	1.49703	31.6473	30.8331	3.25424	2.93587	13.8622	3.78118	7.78026	8.86207	26.4018	23.1018	22.1879	14.5051	1.2985	12.5088	6.20472	31.5618	16.8013	5.62678	35.9059	17.7751	11.4369	9.87233	28.1446	13.774	10.5816	21.9209	16.3903	8.20819	34.9889	27.5055	35.7767	5.33845	34.0039	14.8987	21.3753	4.50943	27.5416	17.774	31.2344
		590	14.2235	11.9259	18.1185	26.4902	18.7243		1.15864	2.96937	31.9091	19.9631	5.03821	3.5911	13.1384	3.21905	7.62776	5.71866	24.9784	32.805	22.3095	14.7435	1.42431	14.119	11.0126	28.2117	16.3643	4.11332	30.7207	17.878	11.1099	4.5307	31.9908	18.0316	10.9994	21.9684	13.8814	7.78675	36.8896	28.3409	34.6171	5.64644	34.4188	13.3076	20.1787	7.03651	18.4417	17.4832	26.981
		600	14.8238	12.4318	16.8618	29.1467	17.7641		1.40073	1.96074	32.2019	29.4096	5.98314	3.53874	14.261	4.37925	7.44092	4.25903	25.5953	32.8968	21.9146	12.8598	1.31454	9.16774	7.75838	27.2577	17.4406	4.678	30.3392	18.1302	10.8616	7.38985	32.8411	13.3657	12.9716	27.9928	14.1271	7.65241	33.1273	28.2851	32.8714	5.58152	46.66	12.5633	21.7294	4.06986	20.5953	17.6906	26.5241
		610	15.7544	10.4329	17.5103	28.7399	17.5182		0.618798	1.27772	33.9793	26.3713	4.14631	3.22296	14.4782	4.08029	7.27592	6.32515	24.6394	32.4656	21.6815	8.90643	0.441479	11.5621	9.2268	34.8352	16.7221	6.04024	46.2006	15.4449	12.8471	6.38182	34.8422	13.695	13.5617	22.9909	15.1444	7.29193	31.3318	27.9379	36.9735	5.83134	48.7538	13.2926	22.7902	3.25896	22.2808	15.0506	34.4049
		620	14.513	11.5262	17.0452	26.945	18.8884		1.4173	0.260645	33.5939	29.6895	3.43813	3.10933	14.7248	4.38946	7.24303	5.98053	27.2113	34.3796	22.222	14.5012	1.13697	10.0932	8.86838	41.9425	16.8514	6.36433	44.5215	19.0059	10.1158	8.89768	33.4495	19.9287	12.6776	27.2312	12.8321	8.72446	30.1398	28.1995	34.5333	5.4603	42.4778	13.3542	27.3185	2.47218	25.9928	18.7073	41.187
		630	15.9209	12.3621	18.7841	24.8222	16.3917		0.755908	0.857095	34.6032	28.2135	3.76171	3.13486	15.1687	2.99642	7.50237	8.35761	25.6336	41.6371	21.7944	14.2816	1.44799	11.4199	8.39201	43.858	17.1587	4.4521	48.9783	16.8989	11.6208	5.64627	33.782	15.6052	13.2504	16.1925	15.3097	7.50735	30.0334	27.8608	33.8049	5.65418	35.9594	12.9198	26.176	3.14601	22.704	16.8259	42.6696
		640	15.9414	13.5855	20.2358	26.02	16.1147		0.258154	1.30202	34.1896	31.6777	3.42426	3.80818	14.0641	1.9883	7.2575	6.17647	25.1151	42.1661	21.721	11.1353	0.661654	8.6489	5.94396	43.307	15.6871	2.87111	45.8456	18.5452	11.8264	5.54257	30.6774	13.2281	13.2502	23.3997	13.0522	8.27855	25.3162	27.7736	29.6059	5.84082	31.9894	12.9055	19.4045	6.28405	26.8797	18.295	42.4057
		650	16.0941	12.5145	18.4134	26.0166	13.9174		0.911074	1.90679	35.2784	25.2549	3.54645	3.65481	16.0453	3.34642	8.03921	6.38519	24.9161	43.105	22.2759	15.0326	1.37055	9.53701	9.69277	43.9014	13.253	4.186	47.7568	14.6768	10.0611	7.41457	27.7101	16.7502	13.4484	21.0494	15.5265	7.75566	27.0179	26.8623	29.5029	5.82459	23.418	15.3664	17.9621	2.52041	22.564	14.6843	42.9946
		660	17.435	12.4573	18.7285	27.2465	14.9394		0.197383	0.792538	35.5481	31.3202	4.63645	3.62224	14.282	2.60811	8.02039	9.69391	27.3059	50.1878	21.9516	15.0117	1.27306	10.1954	7.87024	41.919	14.196	4.09094	52.9608	16.2482	11.541	8.03946	22.8035	10.2888	13.8814	12.1841	13.0875	8.10904	24.956	27.455	31.6175	5.86105	31.366	11.856	16.3748	5.26394	23.6565	16.3291	40.378
		670	16.7749	13.5841	16.9529	25.5658	13.0161		1.59002	0.378754	36.0765	37.5358	3.88078	3.09211	16.1187	2.62616	6.20395	5.64523	27.856	43.4751	21.1373	11.3191	1.12757	11.3153	6.75313	44.7618	16.4713	5.54842	54.0147	16.4812	14.6869	9.62123	24.1046	6.88271	14.1173	25.1609	13.0312	8.49904	24.9781	27.8632	30.2598	5.66592	16.105	11.7401	15.3865	3.30311	28.8577	16.2532	43.2436
		680	17.5929	12.984	17.8877	28.4788	10.0538		2.06897	0.261987	36.7724	34.0216	3.16619	3.38953	17.3823	3.41358	7.55908	8.43753	28.0522	42.4054	21.5315	12.1197	1.86466	11.0912	4.68861	34.5428	17.0919	5.35408	37.6876	18.8778	13.9335	5.24681	21.5824	11.4555	14.7059	29.8497	13.2197	8.67675	28.9228	26.5689	30.4953	6.11024	14.9253	14.3275	16.8818	3.45074	30.163	18.6291	34.6528
		690	17.4545	13.2438	18.557	27.9032	13.13		1.18617	1.41784	35.7773	32.3195	4.45274	3.92138	15.7556	3.16166	6.72842	5.05274	30.173	43.038	22.279	12.836	1.4307	10.7912	9.97433	37.1737	16.2826	4.8617	60.5037	22.1288	12.0561	7.4333	19.8886	17.3109	13.152	25.875	12.5588	9.27578	26.9553	27.2209	32.8059	6.05119	13.4348	13.2265	22.5233	4.84644	23.1796	22.1577	36.2222
		700	16.942	12.9751	17.7566	27.736	10.844		1.69226	1.75056	36.4654	29.2253	6.03705	3.64978	14.2318	2.68075	7.28408	7.27262	31.4328	43.1778	21.9391	16.3695	2.3188	8.70679	8.01178	39.9729	16.4113	3.37779	57.2724	19.2896	13.041	8.28528	22.1978	2.87867	13.1039	21.8337	14.2643	9.12542	24.6824	27.7162	33.6614	6.4206	6.83706	15.2253	15.6778	6.05461	32.2795	19.1198	39.9881
		710	19.3617	14.521	21.4695	27.1869	10.1072		1.78056	3.08613	35.621	40.5278	1.92245	3.43415	14.6799	3.24095	7.07921	5.18763	31.3268	45.6068	21.935	15.2441	3.02318	9.96842	11.1574	41.116	18.2069	4.15572	48.8432	23.0125	12.3582	8.69387	21.8424	11.0133	16.4483	21.8325	14.2383	9.26639	27.7925	29.0843	37.4314	6.06829	7.23437	15.1579	19.3685	4.82066	30.6701	22.7805	39.2556
		720	18.7724	14.8589	18.2551	27.2347	15.7843		1.29874	1.01775	35.6712	30.4892	4.6115	3.70459	13.6933	4.29286	7.76566	5.51034	30.996	45.0516	22.6136	18.1025	2.72043	8.84278	6.51951	43.2358	18.6514	2.59822	52.167	25.326	13.0828	6.25531	23.1007	3.9345	15.4369	26.1644	11.731	9.60639	26.3934	29.2322	39.8945	5.50999	8.92008	13.8851	22.8565	4.14739	28.4863	25.2227	42.1252
		730	18.0092	15.2573	21.2435	24.3862	13.7434		1.03187	1.53099	35.9763	36.9197	3.62757	3.23831	13.8574	1.60664	8.98592	6.73164	31.1841	45.914	22.3118	17.2004	2.00163	9.8966	8.48511	45.4791	16.5316	2.25633	51.7581	25.5449	13.3987	6.39023	19.7167	8.01522	15.2464	22.6478	12.4792	11.3153	29.1558	28.092	36.279	5.93845	6.09772	13.0621	20.9365	3.03046	29.7869	25.405	45.203
		740	17.7225	15.2023	22.9569	26.8945	11.5561		1.50696	1.98195	35.4717	27.5195	6.2913	3.40875	12.8763	1.85856	8.43434	4.30974	31.9776	46.571	22.2609	16.9111	2.66767	11.4154	9.95277	38.558	15.7587	4.42438	49.1739	22.1158	13.2099	10.0171	23.8914	12.331	17.5122	16.4344	14.0112	10.2853	22.9859	27.6703	37.3863	6.58152	12.4542	12.2492	25.4636	5.27692	27.7707	22.1706	38.6943
		750	17.4673	15.5168	18.9241	25.3262	10.7472		0.938222	1.78948	35.1623	24.7434	2.27966	3.37776	13.2451	1.84584	8.56789	5.42901	33.5658	45.795	22.0692	17.2753	2.77995	11.593	7.89814	39.0564	18.9925	4.83362	52.8572	25.6963	9.72044	8.25575	25.1367	21.7884	15.8064	17.4259	12.8726	10.3393	28.9254	26.9646	38.4327	5.97865	8.10952	12.924	24.7858	4.65317	25.8148	25.5369	38.923
		760	19.2506	14.983	21.525	27.5135	14.7703		0.784924	2.67866	36.0531	27.9739	4.5543	3.38795	15.3331	1.817	8.43711	7.98073	34.7093	50.1317	22.7905	23.9864	2.88709	11.0752	8.8699	42.4661	20.4101	4.20233	51.0907	20.0569	11.506	4.2191	23.3369	17.8247	12.6968	18.3522	15.8083	11.4216	24.8134	24.542	44.7016	5.18589	8.55528	12.421	27.2864	0.677908	23.0441	20.1021	41.7946
		770	17.5056	16.0078	21.0883	27.8528	13.2055		1.13249	1.96893	36.8989	20.33	4.46556	3.58235	16.5066	2.66078	8.61803	2.01826	34.5759	54.7977	22.7912	22.317	2.29286	9.72122	4.40045	30.2309	20.4556	5.53209	55.3231	17.2712	12.9765	4.08971	24.2079	8.67404	16.0096	27.1075	12.7027	12.042	25.6614	28.6453	43.1353	5.7166	9.67826	15.7854	25.6351	5.58648	22.4725	17.2516	28.9287
		780	18.5069	15.7146	19.7353	27.6084	14.0535		1.74506	2.1065	36.8804	38.0525	3.57193	3.31793	14.4594	3.75071	8.63053	4.83286	33.7411	54.7407	22.675	22.7673	3.52331	12.675	6.97305	50.0547	20.6505	4.67342	58.0064	21.1256	11.1509	8.3669	21.6809	14.0109	17.5906	27.0866	16.7608	12.0636	26.6398	25.498	40.2961	5.46217	16.1178	13.6327	22.7065	3.7245	20.4569	21.0299	48.6228
		790	20.1997	15.3867	19.806	28.45	16.7638		1.55528	2.06194	36.2545	43.6659	3.62687	2.68494	15.0212	1.71285	7.79724	4.95862	35.0749	57.1448	24.2143	17.3714	3.44975	9.57385	4.86795	37.013	21.6202	7.38193	67.0583	22.1131	13.7358	9.32619	22.129	11.309	16.9757	27.7481	17.0704	12.7024	24.5835	26.641	42.2133	5.86255	20.8161	15.4643	22.9126	3.65106	27.3191	21.8065	37.0401
		800	19.2388	16.1106	18.3085	29.0376	17.4977		1.39662	2.13213	36.5222	41.4371	0.677677	3.16743	15.0793	2.47394	7.7475	4.54016	33.6001	57.1633	24.65	15.535	3.10301	9.01256	5.01228	38.1312	23.2445	4.85344	63.7879	20.5379	14.0324	5.99004	18.6299	14.1815	17.4817	27.4916	14.9666	12.0498	34.1278	23.1256	36.4759	5.85069	21.8776	14.9284	23.3344	6.22822	21.9029	20.3252	37.1523
		810	18.7885	16.0701	16.4629	28.1948	13.407		1.97756	1.97859	37.4137	41.854	2.14933	3.02999	16.0594	3.55899	7.52961	4.3357	34.8907	62.8018	23.8599	15.2248	2.53008	8.59813	4.42861	31.2965	25.2196	2.09245	79.3999	19.6016	14.9416	10.8055	21.236	16.1166	16.3203	17.6722	17.3594	12.1399	30.7264	21.2577	38.9931	6.36717	33.9296	12.593	22.6656	7.44511	24.3278	19.4019	31.5079
		820	19.027	17.0804	16.5785	27.0807	10.4122		1.34855	2.86911	36.4957	33.1513	3.85479	3.41578	15.9727	1.50161	7.39697	7.65091	33.4031	63.8199	23.2044	16.6493	2.40476	8.97538	6.75947	40.3767	24.1233	6.54161	89.8597	21.6559	15.9476	11.4397	21.7277	4.39125	18.1331	19.8769	12.6834	12.4953	28.0028	22.4064	42.4145	5.18702	37.7259	12.8971	23.4337	6.2106	29.8544	21.2003	39.6856
		830	19.4138	16.4479	17.3961	27.9041	13.8084		1.29961	2.62121	37.5625	19.7928	1.88363	3.20976	17.4296	1.79643	7.63829	8.28195	33.1397	54.824	22.968	20.7822	1.97494	6.60153	5.54115	42.9333	27.6827	4.99365	80.8372	20.0125	14.4255	10.284	20.073	15.9038	16.898	15.5262	12.6796	12.59	38.1518	23.4632	39.4904	4.78727	30.918	10.7758	22.1206	5.22425	26.8768	19.5458	42.4417
		840	18.7139	16.1584	18.6205	29.0722	9.14067		0.832744	2.56417	37.9483	29.1937	5.42228	4.00187	18.9831	2.35412	8.02974	8.23651	35.2174	55.6136	23.4393	18.7389	1.5599	8.85823	4.14274	34.9133	25.1224	3.71179	90.6916	17.6128	13.0572	8.15949	21.2993	16.9228	17.4754	17.5978	12.1029	11.8198	34.8555	26.0546	32.9792	5.23109	21.8031	12.344	28.6886	5.8454	26.2793	17.0457	34.929
		850	18.2346	17.5113	22.0579	26.7709	12.2246		1.73149	1.14566	37.6091	47.3373	3.80955	3.37762	17.0679	2.4627	8.67289	6.52759	36.5125	57.0756	23.2012	15.3626	1.43647	10.5187	2.27125	32.6946	20.7344	4.27941	79.5898	17.0519	13.5831	10.3354	21.544	6.57573	17.6553	22.2188	12.0296	11.6953	33.976	26.7176	37.0655	5.80899	34.9834	11.3817	28.1362	5.16879	26.3373	16.722	33.0203
		860	18.8865	17.1471	22.6236	28.6839	11.939		1.18915	1.84505	36.9021	44.1137	3.71665	4.03515	15.1787	1.05872	7.99263	6.60994	37.9338	56.3086	23.6827	15.4909	1.37143	12.6212	7.64753	32.8794	19.9139	4.10745	87.054	18.7107	11.9883	11.3086	19.009	7.34332	19.1471	17.425	16.8128	12.4941	37.9045	26.7846	37.3961	4.64494	29.4201	8.20201	28.4598	6.37938	34.3548	17.8478	32.0108
		870	19.2528	17.7417	22.1771	29.2303	15.9226		1.60272	1.70989	37.0407	55.097	7.00555	3.15854	17.9635	1.57883	7.94539	7.02799	34.8646	51.3638	23.6437	18.5401	1.47707	10.7465	6.67069	31.7222	17.8089	3.50901	100	17.3791	14.2119	11.0707	21.0169	5.37666	18.6467	16.2684	14.9395	12.3533	34.576	26.9684	37.2649	4.51648	27.9596	10.7324	34.7056	5.15377	35.4253	16.9872	31.7404
		880	18.2041	19.0789	21.1992	27.0987	19.8133		1.8158	1.56575	39.6529	47.314	4.0548	3.52568	17.6279	1.46567	8.99026	7.63164	36.0544	48.2719	24.6033	14.165	1.08434	11.1837	7.65362	25.9149	19.0119	0.50577	87.3024	18.7481	11.2768	5.23625	17.0466	7.01019	15.5266	22.6969	15.1235	11.937	34.1534	28.4648	34.1176	5.17116	26.4099	11.3782	31.7577	7.63764	38.4538	18.5752	24.8412
		890	18.5591	18.8929	23.7268	28.2947	21.5034		1.72501	2.09724	39.0941	52.1933	4.66679	3.35739	15.1002	2.86181	8.11868	7.986	37.5784	48.5805	23.9456	14.574	1.27932	14.0625	7.10013	30.6935	17.0921	0.902715	72.0642	19.1342	13.1006	7.92015	20.9015	15.8489	19.0375	23.5797	13.8412	13.0654	27.6809	28.3785	39.6388	4.98377	23.1747	9.59732	28.0028	7.68104	33.4845	18.8899	30.2076
		900	17.5827	18.9076	22.9039	28.7628	18.2939		2.88988	2.02369	39.3322	53.718	6.85962	3.62095	15.2361	1.9525	7.20434	8.67546	36.7689	56.4226	24.1187	14.4102	1.36967	11.2801	8.57363	25.9016	16.6163	2.90689	88.3517	15.8772	12.5659	9.57154	20.2653	11.5714	15.9128	31.4584	14.1448	12.5327	33.3821	28.8585	35.3014	4.82035	20.9716	11.4357	25.3017	7.33457	29.7285	15.6176	25.2201
		910	17.6384	19.6934	22.7202	28.4745	16.1514		1.81654	1.41261	38.3734	53.8442	4.39571	3.28623	15.2071	1.09422	8.09487	6.05923	36.5921	56.1149	24.8803	15.9764	1.51328	11.7093	4.05269	36.8851	17.9634	3.16895	93.2245	17.4831	11.9648	4.58256	22.049	5.30326	16.8369	21.5809	13.3303	11.9611	27.1153	27.3921	33.302	4.14494	34.8104	12.6284	27.3841	6.29573	34.1588	17.0717	36.1005
		920	18.995	18.9161	22.1937	32.0269	16.4465		2.66324	2.73905	38.0579	53.0911	4.59676	3.8132	16.0381	1.6741	7.29987	7.5428	37.421	61.076	24.8613	13.1828	1.47594	11.281	4.81239	31.132	16.4968	0	84.9056	13.4364	12.8929	8.09395	23.3727	12.2243	16.2289	27.7272	12.5116	12.9233	34.348	26.4382	30.6737	3.90325	32.8669	13.6215	26.1509	5.74617	33.5781	13.1367	29.5656
		930	18.8322	19.2011	23.7601	30.5612	16.1606		1.89039	1.49166	37.877	48.5859	5.83877	3.59326	15.0549	1.28224	8.40276	8.30142	36.7473	53.8995	24.4201	14.7135	1.64499	13.9739	10.0261	25.1946	15.753	3.43138	66.5077	19.3286	14.4102	6.10839	24.484	8.96675	16.8958	21.9422	11.4249	11.5158	30.6746	26.6267	31.6006	3.89526	24.206	11.8331	25.2233	6.15718	31.6108	18.731	24.0355
		940	18.2491	19.4666	25.2568	31.8305	14.4771		1.90633	2.03886	38.4189	45.6109	4.64599	3.05022	15.2339	1.06493	8.74211	4.91724	38.3405	52.9385	25.2711	14.4593	1.46604	12.3664	9.50151	35.9951	20.3871	4.08488	65.1206	17.9436	13.2147	8.03225	21.5231	15.4563	17.8049	24.7906	13.9307	12.909	35.7798	25.9281	29.9449	4.18702	39.6534	14.5331	26.0042	5.419	33.1407	17.7783	35.2957
		950	19.5048	18.5665	26.0965	31.7126	15.7182		2.36785	2.02047	38.9341	38.509	6.23827	2.9736	15.8478	1.71788	7.94237	5.49087	36.8476	47.4851	25.0072	14.2613	1.46103	12.9503	5.20633	29.9293	18.3551	0.704517	52.7643	16.003	14.8754	9.19152	26.2534	11.046	18.6697	18.7525	14.6305	12.6181	41.0433	28.4561	33.6524	3.46592	42.411	15.845	25.2846	4.59326	27.7499	15.8351	28.4707
		960	18.347	19.4312	22.4453	30.662	14.5173		2.02999	1.62762	38.104	55.1099	6.99186	3.85323	16.4947	1.44614	7.26803	7.96957	38.9658	51.124	24.516	14.2499	2.15739	11.5708	5.99038	22.9751	20.2433	1.64375	30.388	17.7093	11.7757	11.903	23.667	11.8163	18.9303	16.7378	16.8013	12.9145	37.0144	30.9451	36.2996	3.90787	49.323	13.7752	28.8867	5.79532	30.4568	17.4631	20.9165
		970	20.3972	18.9471	22.9004	30.5614	11.3631		1.89226	2.20891	37.7772	47.904	4.77338	3.15136	17.5538	0.936086	7.71513	4.93753	37.005	54.7195	24.9069	17.7489	1.73246	10.108	7.21276	26.378	21.0999	2.48315	57.0627	16.3923	15.5769	13.5076	21.3864	8.28772	19.5876	28.6094	15.83	13.1651	37.2553	28.1022	32.9188	5.12647	43.9174	15.3097	28.6554	6.27143	37.7096	16.0575	25.4949
		980	20.1329	19.5582	22.9817	31.7553	14.2864		1.6889	1.82706	38.5116	35.5873	6.84575	3.2703	15.402	3.45041	6.91987	7.23043	33.736	53.9394	25.0718	14.5012	1.65213	8.18574	6.00256	22.7355	20.7817	1.79735	55.3769	17.1187	13.2493	7.86061	22.9448	8.17034	19.0321	20.6128	16.7684	13.5348	39.3534	25.9895	30.7761	4.68851	50.5971	15.9445	27.2094	9.22566	37.4641	16.62	23.3046
		990	20.7684	21.1277	22.5704	30.8675	16.4106		1.79288	1.88129	39.2779	47.6314	6.28264	3.14261	16.024	1.66419	6.18382	6.15416	33.6995	58.0516	25.2577	11.8571	1.41303	12.6065	5.61548	22.7919	21.4227	3.72207	60.5144	16.2871	16.1353	14.6743	21.6701	4.37966	16.5057	18.6634	13.5628	13.4808	35.7118	26.2193	31.7114	4.57728	40.2772	17.5584	26.8278	7.4427	37.2422	15.7882	23.4507
		1000	19.2877	20.4383	19.86	30.6541	19.5731		1.30397	2.23065	39.4412	26.8957	6.06044	3.35366	16.9393	0.83017	6.94579	4.38742	35.0293	58.8036	24.8141	14.2638	1.68972	11.7581	6.81274	32.765	18.2676	1.19671	55.2876	16.0722	14.7485	10.8794	29.2629	3.84714	18.2331	14.8353	13.0509	13.5675	34.6995	24.1088	36.1682	4.54669	49.0501	18.3617	23.3007	6.50105	25.5999	15.7767	32.2851
		1010	21.4228	20.6289	23.9731	32.6467	17.6141		1.45727	2.28527	39.1263	27.9607	3.95444	3.31808	15.892	1.40117	6.72053	6.03895	35.2823	56.9407	24.4401	14.6356	1.22043	11.4812	5.49144	24.4111	20.8984	2.41819	38.9127	18.2411	14.2987	15.3285	24.6051	8.41342	17.426	16.1794	14.976	14.0147	31.0929	22.3129	33.1686	4.10599	42.2586	16.4332	27.1386	6.30556	33.8413	18.0112	24.1873
		1020	19.5249	21.0421	22.0972	32.399	19.3147		1.56412	3.31336	39.4584	40.0727	9.0034	3.69541	16.7393	0.943187	6.35579	10.658	36.1894	54.0068	24.8745	16.6599	1.18095	10.5713	5.42828	23.6417	17.3968	4.32474	31.6938	17.6276	12.0461	11.1963	24.5174	19.4259	18.0117	19.2009	14.4894	14.2075	27.4807	24.5918	33.3722	4.21398	43.3567	13.8079	27.6767	6.13159	32.9121	17.2364	22.8553
		1030	18.1587	20.9317	21.005	30.1283	22.442		0.909082	1.97591	40.3377	30.0775	4.87546	3.40617	16.0942	1.52247	7.72645	7.42211	37.4882	50.0561	24.9667	17.0649	1.73659	7.18336	9.30569	26.6631	17.784	1.13486	34.0007	19.5898	14.1878	12.271	28.6991	10.4775	16.5709	22.9794	15.3242	14.3451	30.1835	20.6524	35.4063	2.79276	39.5814	12.9805	25.2399	6.27867	34.9881	19.3652	26.2146
		1040	19.3438	20.9759	22.2894	31.7291	19.9508		1.64382	3.10801	39.8043	33.6255	3.43258	3.65337	14.253	1.54777	7.46368	7.78398	38.8521	52.8154	25.0799	18.774	1.67256	10.2207	3.95681	32.1379	17.1842	1.59842	31.3403	20.043	13.3209	11.826	27.4919	7.59205	14.9368	19.7741	15.2016	14.2788	36.6706	17.0456	33.5898	3.39675	47.4586	14.2956	25.7998	4.88298	36.0687	19.6222	32.1369
		1050	19.6793	19.7887	22.8895	31.5913	21.3333		1.31356	2.39909	40.0083	18.1551	4.59122	3.43544	15.1257	1.87972	8.83961	8.12759	36.7581	51.9878	24.0984	19.6312	1.66779	10.1779	8.38948	25.6938	18.5587	1.71899	47.7949	16.9799	11.6563	14.7946	29.6305	14.8129	16.8189	31.2284	15.9708	14.6635	31.224	21.278	33.9998	3.67179	58.8735	14.9601	25.3236	6.50235	31.237	16.6018	25.2409
		1060	21.2229	19.9233	24.5851	33.4079	24.913		0.637603	2.72738	40.9484	33.4096	7.39916	3.41535	14.371	1.48874	8.02039	6.90994	38.0388	55.4557	24.0836	19.4321	0.954511	10.4725	5.68929	28.164	18.54	1.57163	57.8525	18.25	12.2055	14.29	33.4563	12.8579	16.1486	23.3781	13.7612	13.6201	29.2805	21.8192	31.9739	3.93845	60.7658	14.0643	27.5785	5.35037	33.9281	18.0029	28.4949
		1070	18.5308	20.8705	24.6085	32.0435	19.4226		1.3686	1.98034	40.5714	24.3063	4.02499	3.37704	14.829	1.97395	7.70618	5.98174	37.7024	57.2588	25.0195	17.71	2.19486	13.4939	7.06234	32.0407	21.6988	1.02292	51.4828	15.8359	11.3033	19.0166	32.2798	16.1359	14.9422	24.1484	14.4908	12.5184	29.3146	20.3245	37.4282	3.70187	63.6008	14.0134	27.3021	6.23619	24.9447	15.5331	31.9374
		1080	20.2456	20.5246	21.8664	31.0785	17.2717		1.75988	2.77972	41.5305	27.5515	4.43229	3.5759	16.1415	2.34347	8.07816	3.78702	35.3818	57.8566	24.5121	15.9212	0.883208	10.8508	5.65428	27.8878	21.5997	1.61439	60.1792	18.1383	11.6669	16.0143	31.8725	19.219	16.0182	22.5216	15.0977	11.9023	29.9435	22.2226	33.3396	4.0382	65.6346	12.9228	28.7446	7.51652	33.1218	18.0903	26.9989
		1090	18.2712	20.738	21.296	29.9392	15.4156		1.78616	1.80331	41.3498	36.7159	5.00805	3.7089	15.1773	1.70235	7.71355	8.64604	36.1924	55.6412	24.5396	13.8567	2.02093	9.98353	5.06656	23.5428	20.9854	0.361159	63.1062	18.3581	12.8208	15.1916	27.3204	17.6467	17.0041	25.8047	14.7789	12.9546	26.9193	20.8671	29.5937	4.50462	63.0104	12.6448	24.6542	7.11516	27.1542	17.9232	23.3547
		1100	17.8079	21.5529	18.4344	31.7204	17.9988		1.45067	2.44593	41.9621	36.549	4.91619	3.57977	15.9795	2.23489	7.78684	8.01968	38.5627	57.0724	24.1921	17.9891	1.7381	10.7997	8.93763	32.6428	18.719	2.38497	53.7207	19.305	12.6871	13.7565	29.8684	22.1542	14.8584	32.0994	18.0031	13.6534	27.7386	23.7381	34.4282	5.15019	67.4141	12.0696	23.2236	7.57031	29.6504	18.8687	31.2602
		1110	18.2747	20.6212	19.4647	32.1226	13.1023		1.25603	2.16877	41.6126	38.5483	4.52726	3.48135	15.0605	1.0741	7.13132	9.35923	38.808	49.6593	25.104	17.1484	1.25727	9.7798	10.2965	32.1705	20.6769	5.44528	71.5451	19.8982	14.0891	14.4515	30.6631	23.4296	15.9	27.7469	14.2401	13.3301	35.168	22.7088	31.6825	4.6211	63.0741	11.8611	22.4201	8.31016	30.033	19.5401	31.3889
		1120	19.8354	20.8835	17.7372	33.0752	11.9222		2.44381	1.90424	40.68	33.7031	4.80839	3.0759	15.8697	1.75694	7.23329	6.49797	34.6202	54.2566	25.4109	20.3587	1.21303	8.83124	7.00704	28.9214	21.4558	5.09715	67.8491	20.6275	12.1141	17.7728	29.8154	15.1363	17.6152	16.1231	14.4493	13.3807	36.4576	24.6423	34.6282	5.12509	66.7667	10.8029	28.8927	6.75608	25.0221	20.4137	29.1041
		1130	19.7347	21.8415	18.2238	33.4662	13.1606		1.65702	1.36832	41.4063	36.1499	7.27905	2.96327	16.1973	2.78356	7.36697	4.42028	37.3728	55.0615	25.4224	18.3182	1.95326	12.2419	9.882	26.1566	19.5824	5.85361	51.1212	20.2594	13.8432	16.2714	30.8402	20.7046	17.4747	27.4319	15.6513	13.1047	30.0362	24.2764	32.3	4.53533	66.4014	13.0701	27.6334	9.7244	27.4442	20.1743	26.1119
		1140	18.8903	20.6483	20.3248	32.6891	13.6125		2.06113	3.2951	41.5616	27.3835	4.32777	3.61549	15.8643	1.82188	8.00421	6.69108	37.6785	51.9081	24.1509	18.3607	1.5995	12.5825	9.28007	25.8913	19.7432	2.82688	44.8917	17.3936	11.9408	14.7627	26.2714	20.1429	17.4097	25.8038	17.0592	14.0994	32.6694	24.2489	30.378	4.18539	59.7723	12.8955	26.4998	7.39967	26.6657	17.011	24.7713
		1150	19.4089	20.2037	22.7124	33.9385	9.96116		1.55179	2.57531	41.3026	29.37	6.0159	2.98996	14.8263	3.59464	7.24118	6.81501	36.6213	51.4172	25.1857	13.0511	1.61128	14.0626	10.5344	19.7285	19.658	3.33412	47.058	17.4107	14.5399	15.4259	27.0684	18.51	17.3352	25.6366	17.6675	14.7316	32.4784	26.1138	27.6916	4.9608	63.1385	11.2065	31.143	5.61578	23.9834	17.2756	19.4504
		1160	19.3634	22.1305	21.2756	36.2252	12.3318		1.35939	2.67007	41.4433	25.8578	3.11662	3.04261	16.3287	1.61004	7.96711	6.56836	35.557	56.0842	24.6887	13.4262	2.57932	11.916	8.87625	21.022	20.3466	4.09259	61.6988	18.5327	11.8745	16.1687	27.7785	10.6196	18.2003	22.7709	18.7798	15.0537	34.308	24.6838	34.299	5.25218	63.9714	13.4834	27.1206	7.61074	28.2383	18.4292	20.7534
		1170	21.5882	21.4696	17.3116	30.9144	14.2969		1.12079	3.0201	41.3664	27.2399	3.42409	3.40545	14.9555	2.02587	7.71632	6.72292	36.4647	58.7552	25.1303	17.0877	2.25138	13.7212	10.074	14.1566	20.2069	4.95842	58.2989	19.903	12.8513	16.8656	24.7688	31.0074	20.4695	23.4034	17.6989	15.1161	36.0614	20.7546	32.118	4.68539	65.128	14.8421	26.6497	5.97004	24.997	19.5586	13.6276
		1180	21.645	21.8045	21.0742	30.4665	12.8573		1.89724	2.47559	42.7993	40.9179	3.68944	3.43415	17.1011	1.93785	9.79697	7.67586	36.7845	52.6145	25.5109	15.958	1.6703	12.439	8.59291	22.0675	19.0537	3.5558	54.3992	20.7522	12.4245	19.254	27.7508	21.4163	17.4328	24.5872	17.3224	15.2501	38.6402	25.347	35.2129	5.62747	60.8369	15.3478	24.4813	10.4778	28.7752	20.3564	21.2648
		1190	21.6207	23.6512	17.6392	33.0792	20.1965		1.31319	2.14462	42.6656	39.2924	2.60689	3.08666	16.4884	2.05812	9.50618	6.83489	37.8979	55.9851	25.771	15.5248	1.43346	12.2156	8.43716	19.3523	19.9477	4.50128	52.6393	18.3064	10.8019	14.4542	25.9354	20.6829	16.9654	22.5631	17.0852	14.4463	41.9859	22.8956	29.1216	6.38115	61.8814	11.7305	24.0479	8.74974	30.2708	17.7473	19.1837
		1200	21.1504	24.1883	22.0346	31.2391	15.8853		2.23696	2.3905	42.2855	35.6366	5.5027	2.59154	16.4991	0.96227	8.98855	8.91968	38.2295	52.7692	25.581	19.7801	0.950877	10.3732	11.3134	20.5732	20.4893	3.74574	50.7992	21.3265	12.6039	19.2024	30.6919	19.7525	17.4723	21.7566	14.9137	15.6771	38.9689	23.7112	24.3192	6.33845	62.1319	13.9658	28.0544	8.58337	22.7311	21.1609	20.1358
		1210	20.4291	23.9333	23.1603	31.5372	15.6638		2.13933	3.3343	40.8665	29.2364	6.05472	3.04204	16.8779	1.86211	9.57132	5.91623	35.2065	55.1665	25.2604	16.8312	0.86817	9.42428	6.2694	20.6873	18.7892	3.73547	47.2672	24.1241	12.564	13.425	25.2413	15.4792	18.71	20.6059	17.2065	15.6393	35.2268	22.6006	26.3041	5.40787	59.0747	12.5735	26.3009	8.39214	29.7628	24.1414	18.7672
		1220	20.439	23.3632	24.6639	31.4412	15.3124		2.12352	3.19726	41.9941	31.9638	3.62531	3.45452	18.0207	2.98784	9.13382	8.46004	36.9338	57.8973	26.0565	15.554	1.26767	12.7601	6.05227	19.2604	18.1278	3.86393	66.3843	25.9037	13.3753	20.2282	22.993	15.2108	17.7392	18.7384	16.759	15.593	38.6501	21.4266	29.7575	6.04432	63.2352	15.6721	22.8769	8.88402	25.2851	25.685	18.5615
		1230	20.5555	23.7957	20.0476	31.1676	18.6		2.01903	4.32681	42.821	31.436	2.2398	3.02281	16.532	2.27128	9.21724	7.79696	35.1057	48.371	26.7502	17.9972	2.0099	11.9518	10.907	24.8211	20.7394	3.09793	53.6567	26.6466	13.89	17.7709	25.9571	13.7084	18.2828	19.1191	15.9662	16.9075	39.1548	20.6704	23.9686	5.70037	83.965	13.7963	24.7122	8.64495	21.4305	26.5201	23.442
		1240	19.9575	22.875	19.1916	32.0443	21.6112		2.25527	3.10264	42.7203	29.4433	0	3.57217	16.2426	1.18416	9.47382	6.09189	35.8621	50.1425	26.5366	17.2927	1.95501	10.9959	13.6853	33.4444	20.3611	3.59067	56.955	24.7799	12.8938	18.4174	28.8818	22.6623	20.5438	15.4281	14.5258	15.7067	31.3882	23.0494	20.9386	4.80462	76.5197	13.0747	24.7463	6.93895	22.5629	24.7163	31.6724
		1250	18.5963	21.729	19.7116	32.2935	22.2985		2.75676	1.90692	43.6619	24.0278	3.73034	3.46112	16.7564	2.81462	8.81724	8.11866	37.4542	48.4195	24.7063	13.7664	1.35714	8.55603	9.77698	19.7136	19.6023	5.49153	69.5109	24.4863	13.6474	18.9822	34.2123	4.97816	20.1513	21.6291	15.3177	16.5845	34.8059	22.4478	24.4737	4.55431	73.4002	13.0461	20.9444	6.43113	23.6277	24.3784	19.6165
		1260	20.5145	22.9351	23.4866	33.3241	24.7115		2.02501	1.31839	42.6961	39.0682	6.75164	2.65136	15.7688	3.18681	8.89908	9.76187	37.1589	61.1706	24.9977	18.1039	1.89737	11.0212	8.33748	17.142	21.8447	2.64446	59.4036	24.0804	13.2693	20.5426	30.0497	19.0651	21.0552	20.1325	13.9917	16.1606	29.3278	25.6627	23.1875	5.65368	78.2957	11.6706	25.3133	4.78412	23.6546	23.9254	16.0648
		1270	19.7354	23.0822	22.6	33.3502	21.1239		1.83087	1.70842	42.7037	36.6366	7.18338	2.54319	15.7788	1.79111	8.31461	10.3751	38.2744	57.7742	26.8724	19.0448	1.49073	8.84465	11.6109	18.1631	20.7914	4.07405	52.9461	23.7853	14.3118	14.7552	31.8095	12.3565	20.3378	22.1259	14.9377	16.757	34.3727	22.2409	27.5992	6.34457	69.7888	13.5824	24.1156	3.96414	16.0517	23.5393	17.0168
		1280	18.5887	22.554	17.1116	31.8099	22.1095		2.5001	1.41516	42.0496	35.6707	3.56829	2.97991	14.25	2.71048	8.57816	9.943	38.5967	56.0244	26.7713	18.4951	1.53997	9.08625	9.2022	31.8322	20.4676	4.08506	45.3514	21.9069	13.9568	16.4721	33.3376	16.5829	18.5948	21.8072	16.3877	15.264	27.7889	22.3011	27.2171	5.95481	69.8735	13.6279	23.5988	6.33913	13.164	21.5069	29.9737
		1290	19.5896	23.8827	14.9812	32.2811	16.531		1.41916	1.69701	41.8815	35.928	4.86714	2.93917	15.1549	0.687864	7.885	9.54077	39.4018	62.348	26.2188	19.464	1.96591	11.1626	11.823	17.9352	20.781	4.8384	58.269	21.9147	12.4184	21.2494	28.7393	12.8448	17.0317	28.0684	17.9686	16.4641	33.2289	20.756	25.3775	5.7015	70.3021	12.6034	26.6832	6.31836	14.5685	21.7345	16.1959
		1300	17.9358	24.0565	12.7923	32.4237	14.8002		1.87732	1.88746	42.2896	44.4298	3.94595	3.14792	15.0362	1.86936	8.79434	8.7856	36.9502	57.8285	26.1771	17.2945	1.02845	9.27691	10.7642	16.581	22.5457	4.11406	56.3775	24.7824	11.7136	19.3793	34.3187	19.4544	15.788	23.6144	17.6468	16.1725	32.4167	17.075	29.6129	4.7231	66.3998	12.227	22.1028	5.93016	14.1179	24.7115	15.8501
		1310	20.669	23.5361	15.1753	33.3336	17.261		1.76225	2.08006	42.212	39.2858	2.95387	3.6307	15.2448	1.65738	9.22947	7.61217	38.2638	54.9421	26.0342	16.594	1.98596	9.11324	12.8183	20.9946	23.8483	4.36162	71.1555	26.9359	12.7071	18.3986	33.7114	18.9323	16.1208	22.0534	15.8841	16.5913	28.904	20.8255	28.5841	4.95506	65.4623	13.4901	18.8521	6.31836	14.1103	26.6105	19.4726
		1320	19.0642	22.2845	12.7551	33.9768	14.3706		1.49824	2.44512	43.3689	40.9993	6.4615	3.59656	14.3618	2.54865	8.405	4.06694	37.2656	60.8484	26.7567	18.3919	1.38421	11.6233	14.2424	23.3678	21.4184	4.26289	50.5935	24.6449	15.0837	16.2652	31.2075	24.399	17.7113	18.9484	18.6857	15.8324	29.7649	15.5527	25.951	4.98851	74.1518	10.5084	17.6612	4.34825	10.4534	24.338	22.6344
		1330	21.4443	22.152	14.2884	29.9025	14.1017		1.63199	1.58185	43.0577	34.8004	4.51375	2.9538	13.5204	3.10559	8.46789	8.36876	38.7541	64.6511	26.712	18.0948	1.39386	12.2334	7.22316	14.9542	21.1952	2.12897	67.0339	23.8888	13.0819	20.8665	36.313	14.5966	15.8852	25.3712	17.2045	16.7264	30.412	23.1498	26.1496	5.26067	68.7936	11.6277	20.1757	5.25893	15.8586	23.7097	14.2008
		1340	19.4107	24.2933	13.977	29.5467	13.2098		0.65815	1.35194	43.0525	41.5859	7.64111	2.88723	14.5884	0.595557	8.93421	8.84503	37.8287	58.3606	25.7548	17.1365	1.41654	8.82937	19.5141	26.839	21.9788	7.16574	75.136	22.2899	12.4148	12.9	37.3552	22.4195	14.7568	29.5959	15.4408	16.0414	27.2955	24.5396	28.7782	4.89338	66.1433	11.4205	20.7526	3.69854	13.4408	21.7655	24.6778
		1350	21.316	23.7762	12.9456	31.4182	15.4994		1.63585	1.00862	43.2157	38.7124	2.84139	3.89383	15.2003	2.05146	7.76513	9.51521	37.1335	59.1199	25.3442	17.3224	2.22105	11.2798	10.821	23.8835	23.281	4.53688	74.2426	21.5545	12.379	16.1368	29.9149	17.4652	13.121	26.245	13.9356	16.5889	27.1579	20.9535	29.5404	5.70187	58.089	9.4052	17.3984	6.1837	19.9239	21.0113	22.1106
		1360	20.2453	23.8559	15.1339	30.3982	16.3098		1.29501	1.58776	43.0139	19.815	2.10097	3.53845	15.8208	1.76714	7.95145	6.31805	36.9313	57.6249	26.0734	17.2567	1.9287	12.1309	17.1592	31.5623	24.8911	4.79784	70.5989	23.1497	15.0908	18.7419	38.3325	23.4171	14.3833	30.4344	17.3509	17.124	25.8169	18.7675	28.7629	5.42722	60.9551	12.2946	19.6479	8.65478	17.0759	22.8227	30.136
		1370	20.3849	25.9552	12.1577	30.6491	17.4633		1.83161	1.66279	41.9041	23.0713	5.79735	3.5132	15.8113	0.41686	8.82395	7.49493	35.8883	68.7276	25.0421	14.7749	1.57105	10.7981	11.7915	40.4431	27.036	2.76301	62.1773	26.1492	15.6597	17.2065	32.756	16.4815	14.2234	27.8725	17.5726	16.7669	22.7104	21.2439	26.8665	5.68714	64.2665	12.5372	20.0217	6.63645	14.9585	25.849	39.6279
		1380	20.2443	25.206	14.7126	32.2401	16.9107		1.70434	1.64641	42.844	24.4979	5.04081	2.93716	13.2036	0.749402	7.99079	11.1034	35.754	67.5873	26.031	15.936	1.19674	10.6538	13.4832	33.2404	27.7486	2.51068	69.1554	25.1355	14.1215	15.3832	34.0505	15.1541	15.066	22.9244	18.48	18.6671	25.84	22.5159	29.0904	5.35793	63.0362	10.5059	20.7031	6.70248	19.7294	24.6518	32.5363
		1390	18.8934	24.6032	14.2884	28.9416	16.072		2.07781	2.183	42.3043	35.9545	3.94751	3.44878	14.4277	1.17987	8.30329	6.34584	34.4067	71.038	27.0595	16.2943	1.74787	9.51749	10.5567	40.7759	26.2155	5.39702	62.4389	19.2268	13.1504	16.6793	34.533	17.3659	16.0536	17.7112	17.0733	17.5348	23.0024	19.3586	28.5216	6.32459	64.3246	13.1611	22.6411	6.52053	18.5891	18.726	39.4894
		1400	20.1832	24.2987	14.6548	29.2782	14.2057		1.75914	2.29212	42.9335	32.2097	4.27994	3.34505	13.545	2.83873	8.45329	9.33327	33.9202	65.724	26.2148	17.3993	2.00815	11.2246	15.5847	34.4182	25.6505	3.69546	69.0244	21.8869	14.7595	18.0059	32.6877	17.6039	16.6841	17.3519	18.4236	17.1527	29.9536	23.7077	28.2473	5.90462	61.5362	14.2364	19.3203	7.22273	17.4193	21.2818	33.9642
		1410	21.1621	23.9807	15.0417	30.6515	13.0875		0.867239	2.54015	43.1231	36.1815	6.94714	4.22525	14.5484	1.71493	9.55382	7.01968	32.7305	58.0534	27.3958	20.4045	1.73534	12.0453	13.6853	37.3512	26.9982	2.93277	69.2042	21.9329	12.7554	15.3023	27.9736	19.2348	16.8568	21.1269	17.3435	16.2712	23.3245	25.6912	30.0933	6.15918	67.6706	13.8777	23.5727	7.71034	20.2813	21.8133	36.6978
		1420	20.3736	25.7468	14.7841	30.8242	14.1446		0.606221	2.86857	44.0246	40.3919	0.856369	3.97547	14.2594	1.59969	8.36868	6.21968	31.4576	63.6529	26.9863	16.6598	1.55363	12.8798	11.7431	24.7669	26.3769	1.99317	54.8193	23.923	13.3479	15.8969	36.0675	22.1349	18.5954	24.7803	17.4007	16.1486	23.5828	25.5448	25.0396	5.73121	66.1083	11.0361	23.0776	8.65032	14.9984	23.5776	24.9111
		1430	19.6029	25.505	14.0308	29.4714	16.4457		1.60995	3.92283	44.5632	36.459	6.54764	4.11133	14.6751	2.88045	9.37684	6.39736	32.6732	56.1656	27.5243	16.6158	1.60551	9.63667	12.2042	41.6263	24.6327	2.73861	63.1398	23.2551	14.5946	14.4114	32.2776	22.6953	16.3361	26.3009	15.2464	17.8066	29.0339	21.6991	29.3627	6.05556	71.5567	10.775	21.4535	8.83784	17.1983	22.9142	40.865
		1440	20.6897	23.7965	14.3561	32.1454	13.2425		0.901859	3.75425	43.2648	38.5462	5.20165	3.61191	15.1224	2.16596	8.9675	8.7858	31.6267	59.8244	27.4565	15.9637	2.26278	11.3076	11.5622	34.9412	25.4369	1.44299	62.4485	25.3874	13.5554	17.1388	30.9771	18.3718	15.6224	19.5719	12.5247	17.7323	30.1762	22.0434	27.7308	6.17179	67.1954	12.9847	25.2159	8.47412	17.1483	25.1634	34.1878
		1450	19.7767	22.7972	14.2215	30.1822	16.2599		1.58554	2.78348	43.1758	35.388	4.28826	4.05739	14.2039	2.74036	8.88855	6.24686	31.7059	62.8538	27.521	17.0849	1.38283	13.5046	11.2152	27.3867	18.3003	1.99574	65.2699	27.096	14.8502	11.4536	33.4677	23.3081	15.0717	20.8044	19.444	18.1771	25.1664	22.1777	27.2935	5.88689	73.5675	14.1792	25.8126	8.58392	15.4516	26.8481	27.3089
		1460	19.7223	23.6221	12.5416	30.1999	13.6731		1.96785	2.84347	42.9087	32.4385	7.18251	3.97432	15.6237	1.97128	8.38934	7.92089	32.8959	61.7276	27.9879	18.3277	1.46216	13.2562	12.935	32.0014	21.0709	3.76464	72.7509	31.0388	14.3215	15.3182	31.7433	13.4715	16.5381	25.8009	15.9635	17.9904	30.4016	25.2915	30.5761	6.23833	71.1451	12.422	25.9346	6.9894	14.1593	30.7513	30.9797
		1470	19.2961	24.9726	13.247	30.0937	18.6531		1.88765	3.09137	45.4795	48.0024	5.11828	3.62525	16.7257	3.1371	8.81092	7.1641	34.3109	60.4235	27.1639	20.9317	1.12256	10.7747	15.0855	32.5737	23.2022	1.79974	71.8336	28.3842	14.2112	13.8699	33.4343	21.4847	14.2031	24.2044	15.3036	17.1192	34.6708	22.6374	28.4773	4.93208	69.7482	14.378	22.4685	3.9621	14.9703	28.0129	30.8805
		1480	19.7237	25.1113	14.2794	29.1823	16.0726		1.72178	4.47297	45.8543	40.6985	4.37838	2.91449	16.8705	1.34777	7.81868	7.0499	32.8881	69.305	27.3019	19.73	2.0317	12.1268	11.5166	29.7767	24.2518	2.82266	57.3121	28.8067	15.603	13.1413	30.0051	19.1346	14.617	26.175	17.4083	16.6254	33.7351	23.4407	30.062	5.3392	69.1329	14.4971	24.9423	5.53065	12.0555	28.7003	28.8173
		1490	19.2802	24.9201	14.546	29.1845	13.8593		2.76037	1.9143	44.0581	27.7462	2.52179	4.46987	15.531	3.16195	7.97855	8.59452	33.3185	68.662	26.7805	19.2864	1.9609	11.2625	14.2594	27.9881	23.9281	1.57915	64.346	29.1417	14.0023	16.1764	28.0624	20.2116	17.0451	30.6759	14.6238	17.198	31.9435	22.8226	27.2545	5.78177	70.8988	15.6908	21.0311	6.6153	6.1399	28.777	26.8087
		1500	18.9945	25.9976	12.736	29.6328	11.2144		2.64667	2.96306	44.5483	35.7118	4.2061	3.79598	14.9356	2.44628	8.02513	6.7002	35.52	67.8819	26.4731	17.8202	2.06165	10.8754	15.5642	26.1878	23.6764	0.897026	61.4825	30.678	14.3853	14.9026	32.8534	10.3709	17.1831	22.1038	16.3152	18.1127	33.944	26.9425	27.6747	5.00387	73.4052	16.798	23.74	5.46444	13.5732	30.5591	24.5637
		1510	19.8503	26.3233	12.136	29.8964	16.9824		3.26037	2.61303	44.2511	25.3498	1.89386	2.96585	17.4947	2.02617	8.46829	6.8716	32.6898	62.8258	26.7838	20.7661	1.2292	12.2995	16.0025	24.242	23.4385	2.50921	64.0438	31.5428	13.8417	15.7332	29.5305	17.4747	13.911	23.1691	15.2386	17.564	29.6012	24.8432	26.1316	4.99526	77.5093	17.2438	24.5124	7.81328	13.7365	30.901	24.0686
		1520	20.4595	24.8477	11.522	31.802	17.569		2.54045	3.78579	45.5436	43.7413	5.38467	3.12324	15.3	1.82247	8.29539	8.41521	34.6159	64.0719	27.3246	19.739	1.69862	11.8608	15.433	23.681	22.6004	4.93915	61.9503	28.8256	12.4326	15.6502	33.2824	23.6983	14.5309	26.2284	13.7702	17.7672	27.9299	24.2588	29.4075	5.19326	75.2727	12.6232	31.2523	5.34759	12.5278	28.5498	22.3266
		1530	19.2071	22.7329	14.0291	29.8538	15.1469		2.02538	1.30349	45.7386	37.766	3.09149	3.267	13.5133	1.78268	8.14276	8.86998	34.6079	64.0896	28.4114	22.6016	0.972431	13.3104	12.2912	20.1672	19.3884		50.4599	32.238	15.8082	14.1707	33.7593	15.9927	15.4228	22.3784	13.3838	16.8841	28.0819	26.3709	30.8429	4.43433	79.5685	16.2386	26.5573	8.37063	12.7207	32.361	19.5428
		1540	20.2115	24.7805	12.4858	30.7946	15.3306		2.75825	1.66587	45.2685	32.6328	3.59498	3.78623	13.0318	0.98934	9.60855	6.17302	34.6738	68.3792	27.985	23.9746	1.67694	12.3813	10.0735	30.2762	19.9447		61.8268	32.5812	16.4616	20.2354	31.4745	9.51651	15.1143	20.0613	14.0054	16.7963	29.96	25.0989	29.928	4.5427	71.8739	16.6257	26.7488	6.12027	10.8457	32.3965	28.722
		1550	19.0587	24.9857	12.2321	29.1988	18.2252		2.31666	1.04969	44.4362	32.0369	2.82493	3.48364	15.7956	1.25857	9.68053	7.78682	34.3416	66.3851	27.8363	21.6735	2.16266	12.0154	9.72803	26.9726	21.7549		69.5805	36.3065	13.9456	13.6084	41.0732	16.2976	15.2831	21.3066	11.1307	16.976	26.6758	23.4695	30.5469	4.2573	73.4228	16.6924	22.7372	6.46488	12.8969	36.2824	25.9461
		1560	19.9956	24.687	12.3766	30.2876	20.2141		2.7925	2.29668	45.2483	26.1885	7.31267	3.88006	14.113	2.30102	9.18513	6.92759	33.5464	60.5145	29.5822	26.1976	1.7307	13.0445	12.6017	35.1136	20.7381		56.9987	30.1169	14.9845	18.6569	31.938	17.4039	14.152	24.2981	13.9088	16.7329	25.9586	21.4884	28.5122	4.76904	71.5706	16.8414	24.2101	6.2872	9.39563	30.1099	33.5545
		1570	20.2843	25.05	12.2816	29.6839	24.03		1.73199	2.33534	45.1972	21.9997	8.01323	3.61966	15.7161	1.7704	9.05013	9.21582	32.168	62.0294	27.5817	21.2632	1.53033	11.2869	12.7519	32.4252	21.4987		51.4204	28.0165	13.2835	19.0264	35.3495	12.1206	13.1549	27.1481	13.3821	17.3239	33.7068	22.1395	28.179	4.8809	74.5161	17.2505	20.796	6.40423	16.8026	27.6887	30.8092
		1580	19.4548	25.2166	13.7378	30.6596	22.557		2.48927	1.46576	46.2726	22.903	5.75973	3.51291	15.1451	1.9775	10.1982	6.48986	33.8719	59.4475	27.4165	21.9143	2.3614	11.9851	9.53981	34.4171	20.3242		66.4508	29.7257	13.8304	15.4187	32.4196	14.3844	14.1642	27.7984	15.7009	17.9169	31.8024	24.8525	28.9225	3.79638	71.9845	16.4144	26.7822	5.88695	11.8587	29.7117	33.3127
		1590	19.7792	23.2199	13.1278	31.8832	19.8422		2.6392	1.56803	45.9601	34.3157	5.93011	3.49928	14.2773	0.965524	9.26132	9.13367	35.751	61.7891	28.9694	22.5384	2.37018	11.3005	13.0844	37.7919	20.5703		43.3563	26.6796	15.2982	15.5172	38.9947	22.145	14.22	30.6978	14.8949	18.0798	28.6308	25.63	26.9214	3.52797	69.7331	17.4185	24.701	5.63637	17.407	26.1933	36.6206
		1600	19.2858	25.4501	10.7347	30.2197	17.8913		2.08566	2.00664	45.7819	20.7771	4.09189	3.38321	14.2636	0.0658278	9.22289	9.24016	36.6412	59.9801	27.3489	18.5794	1.59449	10.9978	14.9701	30.7439	22.8551		60.938	31.342	14.3915	14.1126	35.9545	21.107	14.3579	30.8894	13.4632	16.5914	30.1322	24.6502	26.3894	3.73895	72.7623	16.2664	24.1984	5.9743	16.8061	31.0224	29.4501
		1610	20.356	26.5183	13.1816	30.5188	17.6596		1.10933	1.90155	46.1795	28.1175	4.46574	2.94935	13.7041	3.04494	9.76934	7.27424	35.6549	67.4072	27.8035	24.3952	1.75752	11.0963	17.2957	39.9604	24.6171		33.86	29.1827	14.5006	12.8923	38.1312	13.8867	13.5628	29.2572	16.2289	17.3414	21.2936	26.8943	28.2339	3.21598	70.6464	15.7797	23.3128	6.75033	13.8543	28.8931	38.2989
		1620	20.5047	28.283	13.704	31.6054	14.1859		1.80036	2.17361	47.1959	20.4211	4.50231	3.43314	15.36	2.22779	8.61776	8.96207	37.3645	64.9303	27.5519	22.4617	2.15376	11.2939	16.262	47.7797	22.2102		63.154	26.4562	15.4881	16.2398	36.1277	23.7315	11.5999	33.1016	17.9713	17.3283	23.1887	28.777	31.3714	3.98639	72.1739	17.02	23.8054	5.00891	17.971	26.0998	45.8279
		1630	20.2195	29.8804	13.5927	31.1253	19.9528		1.82377	2.5227	47.1155	26.4301	8.19764	3.1089	13.2635	2.94199	9.64092	8.86471	36.5692	60.538	28.357	23.3402	2.09499	11.7812	18.0427	35.568	21.7044		37.9725	25.7816	16.4027	15.7438	37.2607	20.4725	12.0153	29.5847	12.3706	17.507	27.8002	26.7212	27.8739	4.50949	73.7207	18.079	26.6128	7.02483	15.4202	25.4883	34.1732
		1640	21.0274	26.0254	14.6004	30.4279	19.5258		1.58566	1.33101	47.7963	28.7361	6.1556	3.69326	14.8495	1.96699	10.2709	7.03509	34.2808	58.4376	28.5586	23.5194	1.48008	12.2173	20.265	43.6618	21.2878		40.1642	30.1912	14.9766	16.2345	35.7842	12.6246	14.6501	32.6303	14.0253	18.5087	19.1955	26.1105	32.0845	4.57491	71.6443	16.1601	27.3955	5.34277	17.0035	29.5874	42.8512
		1650	23.2829	26.0139	13.7736	30.897	17.2122		1.762	1.91041	45.9446	38.9958	6.39772	3.45423	17.4668	2.01433	9.54987	6.44118	35.9103	60.2457	27.4296	15.997	1.48258	14.5806	14.8768	39.8976	19.1328		40.1835	29.1414	16.0502	15.3943	31.873	7.36917	10.982	34.395	13.87	17.2111	20.4972	23.2659	26.42	5.13346	67.0043	17.3389	24.4395	5.55217	13.6884	28.9085	38.3125
		1660	21.1196	24.3805	13.9725	30.8236	18.4393		1.09439	1.82143	44.7884	36.0796	3.07866	3.67747	15.4635	1.24215	9.97461	7.20649	36.1453	58.4086	27.613	18.8079	1.36028	12.1416	11.8319	39.4794	20.4842		39.382	27.553	13.0271	16.3768	29.569	13.3176	12.5495	36.0691	14.1765	16.7822	28.4692	24.2176	30.539	4.34844	74.8135	18.7586	26.8769	3.54812	13.3569	27.2665	38.7041
		1670	21.0091	26.7927	14.4643	31.0006	18.9653		1.87557	1.00701	45.0684	31.4899	7.66191	3.5528	14.0638	2.04377	9.175	6.43063	35.8569	54.5579	27.3984	23.3088	1.17093	11.7981	5.06631	47.7507	21.3187		39.353	27.8796	13.3013	16.3437	34.9598	8.02562	11.8084	35.5122	13.1949	17.2972	26.2355	18.7844	32.7618	4.32722	67.7205	17.6797	22.2056	5.40546	14.0552	27.6741	45.8233
		1680	21.3248	26.5316	15.5303	33.7354	12.8555		2.09176	1.59756	44.4961	30.7024	6.70606	3.24046	13.3538	1.79924	8.53671	8.66734	34.8488	57.3566	28.0651	19.6076	1.55752	10.4728	11.9478	45.6626	20.0603		39.0376	27.0872	14.0762	15.7531	40.3105	13.2899	13.7332	44.8472	17.8565	18.1787	24.0546	22.6621	30.2275	4.196	63.9302	19.7946	24.2407	5.62153	21.3945	26.8073	43.4301
		1690	21.948	26.3335	13.4544	31.2674	14.7621		0.7447	2.59813	45.817	30.8359	5.23822	3.08092	12.984	2.79213	9.93237	7.16247	36.9851	65.0176	28.7646	19.3303	1.43709	11.9207	7.89307	40.9827	20.8013		46.9041	25.9046	15.195	12.7927	34.5987	4.53894	15.8367	40.61	16.0621	17.0663	26.0614	20.2256	32.2849	3.62522	70.3141	14.7696	24.0713	5.95093	17.6852	25.6866	39.5813
		1700	20.6573	26.072	14.2789	32.6173	19.8777		0.604602	1.04902	44.8097	24.6047	3.56361	2.58393	12.9334	1.34777	8.55974	4.61014	35.1569	68.5407	28.3919	15.0408	1.56604	9.00255	8.10766	45.6149	20.1958		38.5709	29.3436	13.604	18.1307	35.0057	13.2849	17.6114	30.8394	14.7699	18.0605	26.4033	19.8836	36.1929	2.78951	76.4963	18.7206	20.6612	2.92697	19.1371	29.061	42.6331
		1710	20.0995	26.2812	14.6364	32.6916	19.5742		0.541838	1.70265	45.702	20.4402	6.97661	3.64634	13.2455	1.47824	10.1755	7.25882	34.4059	58.6633	28.6116	16.3673	1.57343	11.3503	11.9037	42.5428	20.6716		44.8577	28.4034	12.6574	18.0246	33.0905	7.83781	17.8055	34.7091	13.4105	17.866	22.6155	21.2769	35.0263	3.70974	73.2217	17.7062	17.2993	5.37133	13.0016	28.0925	40.0675
		1720	21.5846	25.0071	14.7435	32.1451	13.9058		1.16039	2.26635	44.3659	28.5546	3.71266	2.92138	15.2524	1.91537	9.28368	7.31562	32.7489	60.7222	27.8773	15.1344	1.01679	11.4793	11.5886	29.4967	19.022		44.8394	29.7762	13.2077	13.7822	34.7009	20.0039	17.4474	39.6375	16.2803	20.6311	25.8273	22.2398	33.9606	2.63508	64.4416	15.6428	21.4462	5.91885	16.5075	29.6756	28.49
		1730	20.7657	24.8728	14.254	32.4937	16.2404		0.449311	2.12878	44.0726	20.7775	6.03375	3.28149	16.3323	3.02897	9.52039	6.76795	33.6064	69.7036	28.5282	15.7804	1.64198	14.1153	5.68929	36.8111	19.8848		30.1066	28.8321	14.0146	12.459	36.6563	6.10383	18.0666	29.6194	16.9666	19.0278	26.3621	19.2527	32.3367	3.14619	67.9675	16.7891	20.399	6.06908	13.6847	28.6441	34.7878
		1740	20.6438	26.9633	13.2159	31.5683	17.185		0.901485	1.90035	43.954	17.4044	4.4699	3.70588	19.5661	3.06772	9.13329	9.64868	33.1519	63.0222	28.8444	17.2858	1.1203	11.139	5.26112	49.6027	20.1274		44.5997	28.653	12.7793	16.0943	38.0288	10.3798	16.7537	29.7375	15.6774	19.7036	18.9381	20.1175	33.6367	3.76542	71.0466	17.2488	17.1545	4.97794	9.8365	28.2415	48.1436
		1750	20.5482	28.8862	11.7799	33.1112	17.6161		0.335738	1.80452	45.3346	30.4232	7.87388	3.24491	16.2436	2.26137	8.96355	7.59554	31.8915	66.4303	28.5053	16.7801	1.37105	10.8881	7.23635	36.9493	20.4731		22.003	31.8479	11.8741	16.8308	35.5268	10.7248	17.7404	24.3388	17.2969	18.8431	21.3908	19.4745	27.9094	3.73221	71.5882	14.9594	17.572	5.39507	5.19729	31.3128	35.2897
		1760	22.0384	28.8867	13.0849	31.1481	13.6502		0.793143	1.60883	44.8747	24.218	5.30165	2.36471	16.3782	2.70012	9.56303	7.45598	33.7139	59.5715	29.4644	18.0581	1.20351	10.9849	9.17328	34.9466	21.453		25.1591	26.7016	13.6675	15.739	37.0103	17.9906	19.0662	44.9841	17.2332	17.8351	17.0384	19.3519	29.1169	4.65418	67.8573	16.2738	17.8834	2.87262	6.4652	26.2157	33.4637
		1770	23.3986	29.1684	12.4234	30.4228	19.9528		0.772097	1.00245	45.9339	16.1676	4.13591	2.62582	19.6411	1.18017	10.0617	9.37525	35.0223	62.5511	29.0692	17.7537	1.67118	11.2983	11.3514	35.8981	22.3514		32.5639	29.4816	13.2976	15.2956	37.0991	17.7855	20.2123	34.025	15.0773	17.5276	19.3068	19.3453	29.8541	3.74494	62.3528	16.0867	20.1666	5.10944	13.4634	29.1228	34.5341
		1780	20.7811	28.6087	12.8057	29.5512	19.4865		0.556906	0.850653	46.3158	33.5682	3.2038	3.1132	18.0763	1.07913	9.4825	6.42677	34.1957	61.6688	29.475	17.1049	0.980827	9.71002	13.7589	29.0111	22.8551		21.3127	33.5466	11.4783	13.6598	35.1846	17.3977	23.9358	40.9019	13.711	16.6366	14.6654	20.0129	29.9451	4.79625	69.276	16.252	20.2726	6.2629	13.1414	33.2032	27.736
		1790	22.9068	29.3077	14.7212	30.7953	25.282		0.604104	1.89981	44.5991	23.4131	6.24676	3.11937	17.1373	2.92024	7.65066	9.44909	32.3366	62.486	29.731	14.8401	1.86253	9.10255	14.5764	37.7434	20.5635		23.9076	38.0815	14.2127	11.6966	34.2732	22.9764	18.7752	32.0453	13.1809	17.057	20.5974	21.9745	31.9108	5.10312	68.5919	18.0836	22.0844	5.1393	10.76	37.4792	35.9645
		1800	21.7747	31.2094	13.769	31.5935	20.8286		0.750802	0.210985	45.245	26.6898	7.20868	3.54433	17.3784	0.404434	7.72987	10.3408	32.9935	60.3425	29.6681	17.1048	1.39737	9.77114	3.07839	29.1374	21.8066		22.2112	36.9345	14.5281	14.1591	31.4215	13.9892	17.8825	30.7631	15.3235	17.2327	18.4165	24.5813	29.3906	4.04969	74.0625	17.3893	24.1969	5.22536	12.2356	36.5447	28.2808
		1810	20.1401	31.4244	11.6477	31.6902	18.657		0.410581	1.01238	43.9851	26.5174	8.07389	3.29813	17.6246	2.64643	8.18592	12.7951	31.7139	62.8439	29.0919	14.1913	2.16566	10.9003	9.54996	35.0962	22.1407		25.9621	34.88	14.4142	9.64932	33.7121	15.9811	17.3816	29.5569	17.5117	16.6575	18.4449	17.5086	29.1339	3.57541	73.4085	17.9693	25.6152	5.10054	10.8708	34.3513	34.3894
		1820	22.0188	28.2705	12.4336	29.6558	16.904		1.0376	0.623159	42.4923	25.8474	4.89713	3.02956	17.7185	2.955	7.84658	10.6596	32.9935	59.5407	27.5805	16.0401	1.66805	11.3879	8.56856	22.7388	21.3095		14.5764	32.2826	14.7007	15.865	31.8664	16.3124	17.0679	30.3231	13.048	17.9029	20.7228	17.3233	30.0282	4.78577	74.1965	16.8331	24.3105	7.08696	14.449	31.4105	21.9244
		1830	21.3241	29.7257	12.2298	30.8957	19.3226		0.820291	0.946885	45.2843	15.8209	2.32126	2.96571	17.3966	1.71211	9.22592	9.65822	33.6962	68.6579	29.3331	19.2996	0.724561	10.9542	4.76319	27.7393	21.7849		30.3113	31.6291	13.4727	16.3948	33.4253	17.8229	21.6837	23.93	14.5982	19.2201	21.5555	18.2129	29.8706	4.09413	72.5068	18.5463	22.5705	4.5315	15.2242	30.8497	25.3835
		1840	20.6375	29.9015	10.6082	30.3029	17.5032		0.37895	1.54078	45.0774	22.4649	4.45551	3.69684	18.676	2.17321	9.65184	9.2714	30.8707	68.3077	29.0803	17.8211	1.27632	11.0587	8.53431	29.0566	20.7341		21.617	32.985	13.645	16.8774	37.727	16.6583	18.291	25.5341	11.7446	18.7372	19.2249	20.5219	29.1465	3.16779	75.5412	16.3478	27.8173	5.96763	12.4729	32.3843	28.0946
		1850	20.2194	30.1574	10.1275	31.5139	15.4257		0.661015	0.915613	45.0323	30.1801	6.61836	3.23716	18.3326	3.06388	9.29947	7.65213	31.4608	63.9186	28.6641	16.4734	2.19023	10.7268	7.60517	39.5829	21.8726		21.7627	31.7449	15.2697	17.3981	34.6593	17.9163	15.898	24.9178	13.215	19.3592	21.1736	21.291	26.9798	3.22047	73.7675	15.6938	25.643	5.55829	14.4728	31.2185	38.522
		1860	21.5872	30.4233	10.6285	31.0711	14.7052		0.956778	1.42133	44.997	21.5657	5.21187	3.633	17.1823	3.73547	9.85908	7.36937	29.2723	63.9543	27.2514	20.2858	1.26228	9.54465	9.27601	39.6304	21.8356		23.448	34.5775	13.5644	20.9721	37.0429	18.7385	17.5836	31.7678	16.1453	19.4416	21.8388	23.3634	35.2986	3.46417	70.3841	15.4455	26.172	6.12955	13.8541	34.1019	38.5902
		1870	22.9338	30.721	12.0901	30.9582	13.6385		0.652297	1.38456	46.1908	23.628	8.63874	4.00143	21.1498	4.16047	9.49618	6.66856	28.808	64.0452	27.9607	22.3583	1.23434	9.83871	10.3891	43.787	22.9676		16.7883	34.9863	13.2764	19.6568	31.1864	22.5449	18.3395	20.7891	14.9973	19.5078	19.9315	25.484	27.4655	3.29588	64.894	14.2792	25.6241	7.31435	13.1284	34.4888	42.3827
		1880	21.3335	32.1889	11.3261	30.5928	17.0269		1.1955	1.83042	44.8465	24.6947	8.27286	3.65423	19.377	3.31195	8.48934	6.35254	29.8113	59.5249	28.4866	20.5015	1.49248	11.1803	7.54581	36.1233	21.8253		28.7921	34.1995	15.065	21.3173	35.4774	21.4968	19.3521	27.3106	16.5031	17.8041	22.8565	25.2698	29.2655	3.79613	66.8139	18.1299	27.2762	6.60158	9.34505	33.6716	34.2705
		1890	20.8799	33.358	11.4886	31.6501	16.8332		0.564129	1.14727	46.6149	24.4259	4.80249	3.03113	20.3608	3.17187	7.3325	6.04199	28.938	66.1113	29.2347	22.3286	2.29624	10.7065	8.62842	35.3753	22.7925		28.0298	34.4906	14.5786	21.0708	39.5589	24.7303	18.68	22.1741	15.17	18.4554	18.192	20.5509	31.6575	4.1206	64.1259	14.7287	24.4045	6.47916	9.44766	33.7236	34.261
		1900	20.1686	32.8129	12.3803	31.483	17.3986		0.47733	1.99725	47.1379	27.6408	4.81879	3.38451	17.8962	2.93119	8.19368	11.0458	30.3164	59.3281	30.2167	20.6344	1.7297	9.80051	10.9829	33.7661	23.1646		33.1246	34.895	15.2917	15.2068	36.7609	21.3982	19.2961	25.23	14.7204	18.9896	19.9146	20.6107	27.1829	3.90524	68.0671	12.9869	27.717	5.78234	14.3326	34.615	32.7209
		1910	22.1918	32.7279	13.8796	33.7621	16.9795		0.342587	2.02396	46.2319	25.5445	5.61033	3.46686	18.355	3.52852	8.64987	8.86045	30.1377	61.229	30.2859	15.6232	1.81241	12.1997	7.58614	30.0997	22.3936		29.9558	31.7399	14.2585	19.6122	43.3259	16.6631	18.2291	24.0069	16.5161	18.7475	20.0546	21.3802	27.1773	3.58926	59.5799	13.1898	24.4942	6.02809	9.1678	31.2212	29.1602
		1920	20.7042	31.269	14.4286	32.2498	14.4677		0.452797	1.08325	46.5689	25.7065	5.66077	3.03286	19.5324	1.99096	9.60421	7.58479	31.6697	60.8398	29.6829	15.1605	1.65777	10.4847	10.7386	28.9453	24.16		22.7953	34.4609	14.3513	18.3525	37.649	8.63065	13.2641	21.8181	15.283	17.6255	19.2913	20.0906	31.1437	3.55081	65.5346	15.1765	25.1542	5.99563	7.51207	33.9062	28.0786
		1930	21.466	34.3324	13.095	30.4257	18.1716		0.933366	1.97282	45.8102	22.1405	5.66146	2.79957	18.5122	2.19096	11.3214	6.48357	31.8516	60.8991	28.897	16.0656	1.65865	11.1436	4.9443	33.5984	25.1264		13.5941	33.9343	15.2091	19.2991	41.1974	4.53984	14.6142	21.8256	16.8397	17.5858	21.4256	17.6365	29.2841	3.86442	60.9232	20.4196	24.0712	5.44107	8.62905	33.5495	32.429
		1940	21.308	31.8832	13.3551	31.2735	19.3962		0.238105	1.24377	45.0597	22.5014	4.33505	3.28235	18.0135	1.72691	10.0749	8.04625	34.3503	59.3457	27.4896	19.2858	0.972807	8.71019	9.75136	26.7249	22.7625		19.1678	39.4286	15.2633	18.9938	40.1391	10.4351	18.033	23.3247	14.3801	17.4393	26.6584	17.8583	30.3	3.62422	56.7143	15.0955	23.3977	6.22636	11.4361	39.3216	25.5396
		1950	22.0941	30.3017	12.9095	34.078	14.259		0.665124	1.61098	44.8178	17.2344	4.25273	2.50057	16.189	3.89997	10.3203	6.61826	35.3128	65.1054	29.1019	17.7885	0.639098	9.37284	11.0864	35.2856	25.0223		21.8816	36.966	15.2416	18.6469	36.0066	19.1525	16.599	23.5694	12.4137	17.9061	20.8195	14.9612	29.7116	3.25343	63.399	13.9045	21.9948	3.52197	6.58036	36.7187	33.2547
		1960	21.4537	30.8505	15.2573	32.0825	18.7194		1.01705	0.653625	47.3045	26.2785	2.12662	2.68565	18.8436	3.68325	9.86303	8.01907	34.5261	58.5154	29.2995	19.3544	0.765288	12.8932	6.39319	20.8322	24.0359		26.3547	39.6974	15.2023	17.5438	40.42	11.6011	16.8906	28.3463	17.1327	19.2647	20.8593	19.0121	31.4712	3.43708	61.647	15.0455	29.7997	4.34974	7.64243	38.942	19.9629
		1970	21.0086	32.3896	13.5921	31.2557	12.315		0.982805	1.23679	45.3656	12.8818	4.38237	2.98321	16.2202	2.2627	9.05553	6.3497	32.9133	63.8204	28.2817	17.5457	1.67644	11.916	8.20405	27.9247	24.9757		19.7941	38.8026	17.6091	16.5168	47.9956	11.605	20.1065	31.9025	15.6551	18.9201	23.3901	17.7248	28.5112	4.0819	70.8663	15.8131	28.3477	6.74755	15.8298	38.3938	26.9726
		1980	22.1608	31.0777	13.0727	31.0086	12.467		0.815932	1.14606	45.4153	23.1078	2.38106	2.05811	15.6346	3.30825	10.672	8.29959	33.2294	59.6018	29.5563	16.759	0.901003	12.7368	6.30086	33.0312	25.6678		32.9245	37.1917	16.5523	20.0263	42.3402	15.136	20.9458	20.9447	14.2484	18.3561	27.1788	15.9398	25.529	4.19476	64.8733	19.124	24.7301	5.23315	18.4234	36.7947	31.2737
		1990	22.655	32.7243	12.9872	30.9427	13.028		1.32963	1.46925	45.7162	15.1113	4.16728	3.70961	16.8075	2.77468	8.04882	6.55091	31.9366	64.9615	29.59	15.4185	0.661654	11.2228	5.81536	28.2325	22.0864		32.062	35.1305	17.0453	12.9413	46.6121	7.61612	17.6439	27.2478	15.4316	19.1814	25.7445	20.2881	19.4504	4.44956	66.8983	20.8267	25.8014	5.45553	11.2704	34.3842	27.4041
		2000	21.3372	33.7818	12.3499	31.5462	12.9937		1.12564	1.3702	45.1451	18.9124	5.40668	2.60316	16.6226	3.57955	9.92513	7.5929	32.1779	69.2729	30.1333	19.8487	2.00526	10.7727	7.75939	30.3927	23.1359		33.181	33.9971	16.9052	17.8016	43.6468	3.65101	17.2615	20.2284	13.6812	19.3888	26.4765	18.5997	21.5284	4.95556	68.2004	20.2695	21.9182	6.10469	17.8925	33.5272	29.1726
		2010	22.1927	34.558	13.453	30.701	17.626		1.47109	0.860316	44.3679	9.18081	5.97361	3.31062	17.503	3.22231	10.4783	7.40243	34.7649	68.791	28.8787	18.977	2.46228	10.8851	3.81324	30.0469	27.5633		31.1295	35.5725	17.167	16.778	43.9547	5.65243	14.9704	20.3212	12.8516	21.1143	28.1322	14.8858	18.5873	4.62909	67.4619	19.8794	27.1194	6.37715	10.5531	35.1067	29.4927
		2020	20.8229	34.2565	13.7531	31.1192	15.7269		0.926641	1.56803	46.0941	24.3853	3.60746	2.91176	18.9864	1.87705	10.3249	8.05943	32.6889	69.1986	28.5625	19.4462	2.63421	11.5596	10.7186	27.4702	25.7832		29.5799	35.78	17.3384	13.0565	37.9886	10.964	16.613	25.6116	12.3002	19.0271	22.9513	18.9129	23.5086	5.40587	66.9799	20.6414	24.108	6.86885	19.1466	35.4685	26.2512
		2030	21.5873	34.9643	13.7702	31.2739	16.0896		1.31493	1.28282	47.4784	21.597	3.50226	3.50359	17.2508	2.07365	9.79421	9.5641	33.8923	66.5385	29.7076	13.7946	1.70288	10.7117	8.36994	34.984	25.5066		28.7972	40.0503	15.212	11.4611	40.2466	20.3037	13.6894	20.0119	11.2296	18.6457	23.5765	16.6349	19.6527	4.34806	65.9228	20.8795	27.1103	4.70826	11.0791	39.638	33.3927
		2040	20.8929	33.7006	14.0781	32.6765	21.0905		1.74556	1.60601	45.4007	14.9618	3.33258	2.63357	17.3389	2.29007	9.76316	9.64077	32.036	60.5597	28.684	17.8206	1.8193	10.2134	8.87168	27.4729	23.6015		20.8825	42.5898	16.7814	10.387	47.2376	12.2906	15.4693	26.3609	12.7042	17.2377	21.0555	17.3179	20.6237	4.12821	61.8988	16.6502	26.0031	2.62817	18.2433	41.9612	26.3705
		2050	21.6015	33.9191	14.2762	30.7782	17.463		1.57919	1.47462	45.3503	21.6325	5.87759	3.38049	17.134	3.12926	8.86474	13.501	31.8211	68.6941	28.2032	16.8311	1.91241	10.4248	5.86533	30.5753	23.9975		22.0233	45.4283	14.4897	12.8988	39.3385	15.2697	18.0819	24.1903	13.3256	18.3427	21.0332	18.6049	20.0751	4.38277	61.787	17.797	26.2241	7.51912	13.1241	44.6992	29.5656
		2060	20.0901	34.7556	13.8342	31.7478	17.6073		1.22651	0.732141	47.7525	29.1892	4.1782	2.6175	20.7657	3.06033	7.86197	7.90426	31.5431	81.3244	28.8403	14.2773	1.66754	10.9187	7.95521	26.548	25.1133		12.7225	40.6521	14.3838	16.5559	36.3316	14.6435	16.0477	28.4128	13.2408	18.6261	25.8435	14.8563	22.328	5.03446	60.8209	20.578	23.9406	4.4154	8.73865	40.1377	24.668
		2070	20.7739	37.3507	14.7768	30.898	16.1295		0.989903	1.36053	46.3822	31.388	3.51681	3.13601	22.1034	3.63429	8.96855	9.70568	32.2255	63.8317	28.7009	16.4075	0.980451	11.3759	4.73858	31.6339	22.3955		26.8479	42.374	14.8753	13.197	30.2099	16.7977	14.604	26.12	11.9352	19.1254	28.5247	17.4497	22.2704	5.56592	60.4325	16.0604	23.1792	6.4851	7.05516	42.0658	30.2789
		2080	20.7405	36.9448	12.6321	29.3006	17.5761		1.00248	1.00178	47.9504	28.0883	1.90391	2.98049	18.4763	4.13813	8.37421	8.42353	30.8439	74.0516	28.4076	14.943	1.49925	10.8122	10.249	34.5737	20.6915		23.0147	41.7137	13.4979	14.3519	38.4101	24.0587	14.5816	21.5344	11.3753	20.2161	26.332	13.3115	28.4445	5.54806	65.4468	15.3195	20.6531	8.016	10.2661	41.1053	32.8436
		2090	20.1344	39.9932	12.2911	31.8931	18.498		0.382686	0.85629	47.3858	18.9218	1.01236	3.13702	18.9378	4.0152	9.16276	9.07972	31.5427	76.6172	28.5176	16.5477	1.80664	9.87097	5.30221	27.8217	20.6893		25.1962	42.7575	13.883	14.4258	48.4976	12.5871	13.2059	27.6859	9.83303	19.477	24.1336	13.7921	27.4943	4.39738	72.6648	15.2388	19.5538	7.25129	5.22937	42.2767	26.6171
		2100	21.1204	39.1404	12.0746	30.5659	15.1853		0	0.409221	46.8161	23.387	5.04947	3.00545	18.0456	3.88414	10.2222	10.1598	30.109	64.9489	27.8685	16.0786	1.6485	12.2535	6.37721	31.771	21.117		21.2726	43.9	14.427	19.6455	49.7982	17.8874	13.1916	25.7903	11.0886	19.3869	24.8736	15.7193	26.5255	3.93109	75.8513	17.6567	19.9402	4.44971	9.49989	43.7548	30.1396
		2110	23.4861	39.9595	12.7289	31.3068	18.5564		0.630629	0.672281	47.402	22.6217	1.94897	3.35997	17.89	2.88015	8.71974	8.99371	30.0851	62.4443	28.8748	16.422	1.48521	10.4694	6.74019	34.3341	20.2952		15.1447	44.128	15.3895	15.2677	42.0121	21.8716	13.335	23.8166	11.2316	18.8749	24.4659	15.6892	29.2688	2.99788	75.6093	17.6807	14.5012	7.4006	12.1449	43.7727	32.7967
		2120	20.9214	40.3339	11.3665	31.2281	15.9278		0.166997	1.7817	48.5566	29.2344	4.75968	2.74118	19.061	3.17083	9.78829	6.40751	29.8724	61.4964	29.3266	18.4915	1.52368	11.6912	7.59147	27.4992	23.153		10.9504	48.1474	13.6388	15.1439	41.3334	11.7949	12.8994	28.9572	10.9338	19.5619	20.7612	17.0126	27.1582	3.51211	76.959	18.1572	17.4497	6.59935	5.25343	47.6558	26.5767
		2130	21.9742	39.489	12.7563	32.9294	16.1066		0.583556	1.1776	47.0535	21.9917	4.53662	3.31722	19.219	4.25736	11.3209	8.4217	31.8634	63.1566	28.1289	19.3378	1.4802	9.91002	9.40056	30.2195	18.8391		24.7274	47.4891	14.6358	15.1907	42.2257	15.3276	11.4833	23.4275	10.176	18.1746	16.7838	18.7458	24.3161	3.19888	71.7058	15.3364	20.6682	6.52998	5.23842	47.0348	28.0949
		2140	20.8712	42.1956	11.5238	31.0741	20.4385		0.721911	0.654699	47.7254	31.0129	4.07092	2.79283	22.5429	2.5837	8.58461	6.24787	30.2917	65.0308	29.0118	20.0532	1.80927	11.0942	11.9042	37.4542	22.9905		16.2855	42.9629	14.8855	11.8529	43.5191	13.5176	11.6322	28.5697	11.2668	18.1781	19.5605	16.6318	29.1408	4.71511	76.6193	14.143	18.4343	6.82656	10.2245	42.439	35.2355
		2150	22.7102	40.4385	12.5259	30.1798	19.8757		0.421789	2.05228	47.955	26.8143	10.4038	3.57231	20.7102	1.26182	8.18776	6.26917	28.243	67.6805	29.8414	18.0836	2.30238	11.629	8.29004	34.3331	20.2982		19.0546	45.1177	15.4687	15.9003	40.4987	8.59974	14.5988	26.0634	12.2653	19.3208	22.1616	16.8365	30.8139	4.69064	76.9414	17.9154	19.5631	6.93599	14.6593	44.7716	32.348
		2160	22.2467	41.2155	12.1192	31.685	18.3154		0.376958	1.06848	49.7308	30.6641	4.55153	2.66413	19.2196	2.72941	8.84421	4.40122	29.5658	72.3624	28.1398	15.0854	2.6505	11.1212	7.07502	37.2981	21.5794		8.12903	45.9142	15.2408	18.3465	41.7198	21.0142	15.1237	32.3591	14.5708	18.5836	16.9732	20.3178	29.1786	4.74307	69.6648	16.828	18.4677	5.4598	11.5846	45.5361	34.5553
		2170	20.8349	40.086	12.7927	30.6967	13.8274		0.0448314	1.92611	48.4187	26.6808	5.65401	2.92539	20.7906	2.44465	7.87145	6.22596	27.9149	70.7819	28.6232	22.181	2.20163	11.565	5.67813	29.6038	22.8647		14.4575	44.78	16.7735	16.7917	39.7804	25.5348	17.3127	28.4828	12.7764	19.1636	19.2184	17.0882	23.8541	4.59176	67.013	15.2849	21.1923	3.76457	6.07533	43.8872	28.0802
		2180	20.2305	37.3206	14.3285	30.5468	14.3378		0.220919	2.52995	49.239	19.6227	5.0928	3.10344	21.3978	2.90426	8.97987	8.98235	29.2393	74.2991	26.928	23.6955	1.83145	12.6115	11.2213	29.074	19.7922		16.7528	46.415	16.3367	13.7858	33.8943	17.2955	16.4434	34.5841	11.6711	19.8263	19.892	19.5066	28.7294	4.60424	72.3273	14.0473	16.19	6.01789	8.51389	45.7681	28.5954
		2190	18.8777	38.2616	13.3258	28.3889	17.3795		0.510829	2.1834	49.7555	19.0803	7.38443	2.5439	21.4467	3.39879	10.0018	7.53915	29.8682	66.9204	26.6229	18.9416	1.88008	12.8898	5.70603	32.2569	20.6138		7.69274	43.5436	14.7937	18.3324	33.2101	19.8906	16.1186	29.9756	12.5903	19.4073	21.6096	16.0321	25.8047	5.23308	76.2882	15.0787	20.2566	6.38606	5.82467	42.9093	30.129
		2200	21.8418	40.119	13.4374	30.5205	16.7468		1.51505	1.51864	47.6165	29.0233	7.53781	3.12941	21.6718	1.87942	9.19829	8.93753	32.5203	63.8235	27.544	21.2088	2.44624	11.6158	7.07705	34.9173	22.0444		26.4218	42.7225	14.9977	14.4904	33.1925	19.4776	15.5953	27.0253	14.1659	20.0569	25.3158	16.5069	23.4567	3.83633	80.5046	14.821	20.2456	8.95079	4.79919	42.4778	32.4992
		2210	21.1632	40.8372	13.9609	31.7766	16.9671		1.35926	1.25652	49.0263	26.8248	5.00285	2.91607	22.7442	2.74657	10.9841	9.69067	32.1932	73.3968	27.9889	21.4419	1.05539	12.0081	7.81443	30.2073	21.6215		14.6312	48.3128	14.7625	12.773	35.2338	12.2552	13.8311	30.5453	12.6915	20.5947	21.4148	14.8253	25.068	3.23208	86.4928	16.0505	22.6993	8.11022	7.68644	47.9129	29.6631
		2220	20.9605	40.615	12.9013	32.4409	19.3524		0.815434	1.88934	48.4439	26.7625	4.38688	3.0957	20.0879	2.79302	11.8228	11.4377	30.2368	60.0027	28.1697	18.2278	1.61441	11.0175	6.81908	26.974	20.7363		11.8408	45.9567	14.7356	12.7735	30.6695	9.52602	10.9126	30.3219	15.9473	20.0004	23.2059	17.1898	27.2516	4.47004	84.7685	14.2322	24.7369	6.37159	8.2803	45.2767	25.6837
		2230	21.3017	38.6235	12.3123	30.813	16.4881		1.3026	1.90947	49.5796	18.5264	5.90047	2.57131	21.5434	2.24599	8.67474	8.17748	30.8405	67.1421	28.4106	19.9843	1.76905	11.3284	6.56847	22.793	21.6571		26.3512	43.9241	14.1433	15.6214	31.3284	19.8889	14.3479	26.2587	16.9422	19.9922	22.1753	18.5363	24.1433	3.51448	82.6489	10.9867	25.7556	9.6823	7.90132	43.4693	20.5485
		2240	20.6176	38.363	14.0946	31.2667	19.9505		1.48965	2.82374	49.205	31.8745	2.49129	3.72554	20.3431	1.86566	8.73974	7.77302	30.3835	70.6462	27.7322	20.1549	1.43008	10.9847	4.33019	24.7642	21.4133		14.9822	45.8687	13.8459	16.1862	33.1813	16.2001	12.1179	29.0087	14.2049	20.223	24.7828	14.8429	25.442	4.1382	76.6019	13.1498	24.1276	6.34562	6.56637	45.1896	23.9209
		2250	21.2648	39.5821	13.2964	30.7975	16.8109		2.1676	1.54629	49.6711	19.5963	4.69296	2.68336	19.4097	4.14789	8.88092	7.23793	29.2872	66.0258	26.8352	15.7191	1.26491	12.9003	9.77673	22.5851	22.0031		15.5246	46.9768	14.5951	17.1234	34.3046	19.8898	13.8508	25.0128	15.5179	19.212	18.3106	17.6381	24.5078	3.72222	73.9219	15.0413	24.0755	7.50298	2.46139	46.4142	21.6293
		2260	19.6661	39.0389	12.3042	31.2563	15.6213		0.830502	1.94719	50.2473	21.9492	3.52583	3.07102	19.6025	2.87453	10.8541	8.16146	28.225	69.7249	29.6437	18.9493	0.987343	11.7484	10.5991	17.268	19.6452		13.3859	45.2482	15.3426	17.6797	36.1448	20.904	12.1968	22.4962	14.5162	19.1849	19.8828	17.3126	19.041	3.95368	70.5066	13.3044	25.5647	7.25519	6.82526	44.8495	15.8331
		2270	22.7904	40.8124	11.5927	31.0318	15.054		0.812943	1.0764	49.9579	33.9099	6.65285	3.06829	17.0028	2.08815	9.13237	8.55822	29.7201	66.9882	28.7732	15.2223	2.63208	11.9224	13.2379	27.3843	19.9351		17.349	47.9556	16.3206	15.3371	32.7057	15.2361	14.1886	25.4716	12.415	19.3006	26.0052	17.5912	23.4633	3.29276	79.3493	12.0668	23.692	5.83167	7.05927	47.4994	26.2599
		2280	22.8977	42.4632	12.0983	31.8622	17.0179		1.44457	0.807704	50.0357	24.2239	6.07951	3.61951	19.0679	2.9945	9.31684	9.28966	27.6425	69.9697	28.9058	16.2996	1.44198	13.0754	9.88656	24.9957	20.8133		10.0575	42.3537	16.344	13.6852	33.5376	22.509	13.4713	28.4019	12.7197	18.7429	21.0442	18.2409	19.4975	3.66542	68.7509	13.9326	24.9759	8.03529	2.2317	41.7738	23.5488
		2290	22.1332	43.6312	13.237	32.2562	16.0855		0.787539	1.33906	50.7495	20.6895	2.74624	3.32898	19.0934	2.8698	10.4421	8.99615	27.3221	66.4955	28.334	13.7039	1.20301	14.8469	4.24978	14.8024	21.0775		7.62417	45.8516	16.2735	14.6649	31.0448	25.0471	13.6467	19.4972	10.6388	19.4327	16.5216	18.0918	20.4629	3.46492	72.3128	14.6844	27.4154	6.45802	3.91807	45.5482	13.0599
		2300	22.6521	41.9251	12.0173	31.4856	16.4254		0.674339	1.65487	52.5907	8.03095	3.73866	3.1944	17.9911	3.31388	8.87382	8.7215	27.1848	66.9217	27.4621	16.4106	1.03922	10.7416	2.60253	23.9073	20.8744		17.8082	46.8936	16.3629	12.9583	33.3103	29.8541	13.0409	24.1509	14.1475	20.9413	25.0859	18.8164	22.9994	3.84844	68.8	14.2517	23.3809	6.2898	6.76563	46.2661	22.3707
		2310	21.8241	42.3843	12.7577	32.2204	16.5058		1.07683	1.97577	52.4465	16.5841	4.55638	4.33443	18.8462	2.86669	8.80697	8.53874	30.0162	72.3122	27.9315	17.2069	0.591855	11.4732	6.07916	22.2173	22.7398		12.6824	49.1776	15.0005	11.7556	35.1459	34.7939	13.5077	24.7481	13.856	20.7369	21.932	17.2857	21.4341	3.72809	63.9646	12.5062	23.4988	5.8365	4.92689	48.4673	21.3244
		2320	21.5785	42.6515	12.0431	32.9899	17.2153		0.721288	2.19173	50.9619	23.2413	4.03313	2.41463	20.7354	3.03755	9.27342	10.2939	30.0425	67.9869	26.3224	16.8469	2.37318	11.2672	6.39446	24.4593	20.8228		28.0867	48.3085	15.5348	13.4668	37.9343	15.8979	12.431	26.3866	13.1034	19.7876	24.4904	18.7675	16.2951	4.09675	54.2555	14.179	27.0177	3.59004	8.83159	47.9433	22.9531
		2330	21.7418	42.7689	12.0328	30.1844	20.0765		1.45864	1.58534	52.57	30.3178	4.93318	2.2891	18.0726	3.02231	7.90934	8.11116	31.093	67.5412	27.6981	16.4129	1.43734	12.1784	8.64009	25.0913	22.3293		28.5225	45.8486	15.0968	10.1458	40.9567	20.0621	13.904	27.8244	13.7446	18.7916	27.0894	18.8184	24.2104	4.33084	61.5569	13.2149	24.99	4.20488	7.40123	45.1174	22.803
		2340	20.413	43.3446	13.7416	32.3417	17.2931		0.866243	2.17307	52.4528	14.6391	3.60954	2.53529	20.4597	3.03326	8.04276	9.33225	30.3936	77.8692	27.5731	16.0339	1.27456	10.3521	7.57803	20.5011	23.1722		23.9518	48.8219	16.073	15.5198	33.2336	28.0069	12.7681	29.7978	13.4908	17.4388	19.0878	19.2275	23.2794	3.799	61.9905	15.2596	18.5178	5.1955	5.92029	47.9188	19.3558
		2350	21.5579	45.1351	12.295	33.1319	21.507		1.17645	2.37117	52.9672	26.1175	8.23213	3.36786	19.0945	2.81506	9.99776	8.55903	27.7733	68.6244	27.3315	15.5103	1.97393	12.6419	9.09363	28.7407	21.9367		21.8486	45.1442	15.7603	11.9342	32.2492	5.47799	16.9415	25.1562	12.039	19.037	24.6508	14.8239	23.1843	4.61698	61.9905	14.6399	21.172	5.97746	1.30863	45.0035	28.3415
		2360	20.3717	45.6243	13.6227	33.9651	19.9379		0.568737	1.92182	53.5372	25.1304	6.24017	2.48407	21.1867	1.9772	7.70961	7.57424	28.2161	72.6308	28.1077	12.9601	1.84524	13.8251	4.00576	19.2111	24.0151		19.3187	45.1268	15.3107	12.8657	34.0916	12.205	16.1991	16.0172	12.5152	20.7535	27.9129	15.6443	20.7943	4.06479	68.0907	14.277	18.7816	5.30604	6.80285	44.7228	17.6759
		2370	22.3978	45.4372	12.5589	35.6078	20.2745		1.32701	1.25034	53.4779	22.2792	4.37942	3.44921	20.9754	2.57941	6.95132	9.22921	26.8077	71.8742	29.4107	15.9819	1.71015	11.6533	8.85976	30.252	22.7918		22.0599	43.9631	14.4549	12.8988	34.8644	15.4049	15.8904	21.3309	14.0255	19.5496	24.8256	17.3659	24.5459	4.38439	70.9141	13.1601	21.7946	6.35397	3.46486	43.6	29.4098
		2380	20.8526	44.3163	13.1464	36.1712	20.2657		1.26898	1.64131	52.9633	14.9343	2.92094	2.87633	20.5566	2.9803	8.28684	10.5757	30.1881	73.6579	29.8382	16.4444	1.70852	9.86537	7.9476	18.7558	21.7151		21.8399	45.7128	14.5901	14.1272	34.7967	15.0477	13.7253	21.0684	10.7305	19.568	21.2678	16.9178	21.8557	3.32821	63.5323	14.0594	24.6131	6.41388	3.40276	45.1356	17.2862
		2390	20.6733	42.8898	13.1233	35.9529	19.6671		2.04294	0.219978	53.3189	24.3411	2.12628	2.92855	20.81	2.40738	8.86842	8.72515	29.6018	76.0425	27.9697	17.3626	2.09511	10.3715	7.54124	23.0713	21.5818		31.5648	49.9441	15.0151	15.7731	30.9499	27.113	15.2213	32.8294	14.5884	19.3736	20.3805	17.4258	24.5414	4.08115	69.5104	12.418	25.0267	6.75515	4.70933	49.3177	21.0222
		2400	21.4175	43.1683	13.8902	33.8568	17.3836		1.47433	2.02007	54.066	27.1634	4.94826	3.52539	20.3951	3.17675	9.22184	11.1101	30.0022	79.5167	28.6072	15.5601	1.82544	11.6019	11.1899	23.9675	25.9584		24.6705	53.3243	16.9696	15.1496	34.8116	28.4452	14.9275	25.3109	14.2374	19.657	23.8188	19.9513	22.0012	3.73496	63.6135	12.4893	26.9608	5.34703	6.74404	52.1733	22.7791
		2410	21.0022	45.54	13.3417	35.886	18.6289		0.586046	1.18552	52.6674	20.4172	4.20108	2.91435	18.9295	3.92408	9.27513	10.6724	31.257	84.8796	28.4609	13.988	2.37331	12.6058	9.38635	25.5322	23.7334		22.9538	50.3332	16.1277	15.2517	32.6701	24.1627	16.5723	31.2653	14.5164	19.0673	17.2701	18.3181	20.7196	4.14594	64.2652	12.7045	20.2262	4.32563	2.32814	49.7002	22.9561
		2420	20.6008	47.1976	13.0543	34.1631	16.3709		0.806343	1.82975	52.5176	35.5692	4.71982	2.60904	18.1365	2.56418	8.96145	7.51359	32.2607	76.4367	28.4886	13.8339	1.41855	11.0963	12.5966	38.3702	21.078		27.5686	56.8407	14.95	11.1233	34.8569	17.855	16.7526	26.6828	18.5572	18.1393	21.7772	17.7483	29.7035	4.53246	58.9155	12.201	22.4236	5.14431	0	55.7984	36.6691
		2430	22.1216	45.558	13.0503	34.5755	19.6411		1.04308	3.06439	52.7321	16.5233	4.62658	2.7934	19.8734	3.57408	9.27855	9.40203	32.0035	67.2991	28.5567	14.117	2.15702	11.8212	7.30103	29.0401	20.2457		33.3018	51.5986	15.6631	9.94171	39.6145	21.7931	12.646	35.3366	14.8596	19.8745	22.7106	18.4814	22.3006	3.79189	58.5056	13.7091	23.0512	6.89759	2.29113	50.5799	27.8984
		2440	21.0039	45.6687	12.0762	35.6279	18.6115		1.25877	1.17585	51.7744	19.5205	3.88477	3.01191	19.5939	2.96166	8.33605	8.29189	32.1604	76.6977	27.7651	14.1834	1.84298	11.4604	11.2292	32.3062	22.84		36.3406	51.327	13.8241	10.8832	37.1884	20.9114	12.5742	28.4316	15.9968	18.5525	26.4626	16.7289	16.5041	3.52884	61.5327	10.6721	24.5	6.80356	7.42015	50.762	32.1724
		2450	21.6234	47.2226	13.3453	33.085	22.2552		0.49464	2.55504	51.5277	20.4659	3.98426	3.3901	20.1114	1.81078	9.18579	8.42799	30.8816	84.3077	28.2246	15.6184	1.84486	11.8834	9.99665	29.2488	23.9266		20.7622	57.8487	15.0859	9.21408	32.2444	22.3833	14.0121	26.9209	16.3955	20.369	20.6282	17.494	23.8612	3.07678	55.034	14.3602	21.5811	9.53318	8.38661	57.1329	28.7545
		2460	20.7927	46.2317	13.1396	31.167	19.9642		0.795882	0.913331	50.9687	34.4593	5.04791	3.3231	17.0633	2.73444	9.02382	6.69026	32.6975	83.2819	29.4651	17.1967	1.47907	12.5513	4.14807	30.4751	26.831		19.1115	59.399	11.7894	12.1659	30.9374	21.9185	12.3024	27.4325	14.1518	19.459	24.2125	17.8159	20.3684	3.68177	61.8981	11.7164	24.0234	7.41173	2.40114	58.5002	28.7022
		2470	21.193	46.3485	11.2533	31.3027	17.3524		1.61181	0.522766	52.1914	28.1662	2.17845	3.20201	21.8299	3.35973	6.76263	11.3398	32.2373	80.0611	27.5176	18.4616	0.846742	10.6216	8.16093	32.061	25.158		11.4512	53.9714	14.8322	15.5419	34.3864	21.86	13.2846	28.2966	15.7816	20.6429	17.6828	16.1549	22.1222	4.43046	61.2694	15.0309	23.0965	8.99679	2.7285	53.2342	31.2439
		2480	21.3895	41.5046	13.5491	32.727	18.9777		0.975333	1.29235	52.6097	31.8773	1.91327	3.53702	21.4088	3.17823	6.90579	8.26471	30.9043	77.5357	28.3972	12.623	2.38246	11.3757	3.83328	35.3846	27.6586		17.1474	56.8946	15.5281	15.2675	34.1464	22.7149	12.9939	30.6956	18.8592	22.4592	17.7885	15.2659	23.3641	3.58077	56.9867	13.3703	22.1523	6.87348	6.77879	56.3673	35.0396
		2490	20.7993	45.3976	12.905	31.5799	15.0584			0.558467	52.7666	25.0789	4.91186	3.42927	20.5619	2.3874	8.20513	7.68215	31.1283	72.4081	27.8915	14.7028	1.28183	12.0239	6.80614	38.4973	24.21		29.3321	57.3874	16.108	14.476	31.5123	20.2493	13.574	21.1056	17.2549	23.6153	14.5148	14.9281	21.0186	4.43396	56.3836	14.2928	21.8198	5.35464	4.11033	56.2752	37.0293
		2500	20.495	39.2868	13.2545	30.1516	21.7326			2.01698	51.7649	24.9353	2.09265	2.66198	17.6277	3.04169	8.29053	7.71075	31.6974	74.8697	29.2875	14.6712	1.43759	12.6097	7.47428	41.8702	25.4741		16.8015	53.5022	15.6097	12.532	32.0314	18.5555	15.6394	19.1003	14.411	21.9686	20.3071	18.6667	22.5227	3.48539	57.2845	13.2591	23.7395	6.54519	2.25638	52.5556	39.8981
		2510	20.7046	41.5784	13.0096	29.7445	20.9425			1.76935	55.9057	21.2789	4.71913	2.19613	19.6357	2.27557	9.16026	7.83387	32.7655	71.4434	27.7023	13.291	1.01253	12.952	2.46378	33.3591	24.0129		18.6061	55.6355	13.9799	13.2469	31.2749	17.6265	15.7311	13.8481	16.2255	22.9578	20.9751	17.7392	20.6953	3.36092	52.8553	14.8309	22.8691	3.92352	0.0713535	55.0442	31.8485
		2520	20.4355	40.7465	12.6038	29.6385	19.146			0.829178	52.097	23.0894	2.84832	2.49598	18.9674	3.54154	8.04882	9.86491	30.3939	78.1005	28.2701	13.3072	1.65539	12.3085	6.55756	32.432	22.6508		26.8012	58.5935	14.8863	15.6031	31.924	31.8534	14.6139	19.8953	15.6986	22.588	21.2141	15.375	24.9927	3.66217	52.7522	10.3763	21.8115	3.32073	3.92773	57.9406	31.0965
		2530	19.8777	40.2679	12.4022	30.4319	17.461			1.26779	53.1416	16.38	4.76038	3.54118	19.6668	2.52942	7.68658	8.91014	28.8479	78.3774	29.1808	15.6336	1.39236	11.701	4.57421	23.7095	18.1672		19.3111	55.9356	13.2634	12.6897	31.2695	28.7474	14.0257	21.9841	15.1135	23.257	19.6459	13.2259	21.2976	3.9573	63.6959	10.4205	21.7054	7.89897	9.65411	55.9425	22.7867
		2540	20.8692	42.2717	13.1364	32.6284	21.2168			1.22994	52.4238	27.9235	7.01751	4.30029	20.6718	3.19923	8.52987	9.47099	28.7694	72.8548	28.1808	14.5393	1.70952	12.1666	8.44427	28.064	19.4599		22.8766	48.7097	15.1573	9.37973	29.293	22.3292	12.2323	23.5619	16.5628	22.0784	11.7447	15.1036	22.1669	3.56205	61.8532	9.14983	19.8976	7.30063	5.19935	47.8339	27.213
		2550	19.9626	43.7695	12.8506	32.4746	20.1885			2.23521	53.4702	25.3119	1.85711	3.20717	19.8668	2.39761	9.19474	10.4434	29.7699	72.0991	30.4423	13.099	1.7891	11.2744	6.89619	34.4957	19.3896		14.3895	55.6332	13.3062	17.9396	37.8163	24.141	12.2733	19.5003	17.6908	22.128	18.3012	17.2903	16.7441	3.04794	55.5474	10.9614	19.6797	5.4828	7.26572	55.0495	33.0458
		2560	20.1331	41.2771	13.9717	31.7958	19.0934			2.21991	53.0821	32.4513	5.5833	2.50631	19.7763	0.584758	9.91658	5.97181	30.8272	78.8063	29.1489	14.652	1.58421	12.4531	6.99436	27.8014	20.3489		20.0054	59.0855	12.938	12.8986	35.0855	28.7899	13.8502	29.9862	16.5092	22.5228	24.9002	15.7936	19.0825	3.42072	61.3708	12.8272	22.8128	6.76813	4.4963	58.5708	25.8577
		2570	20.4109	41.4201	14.4791	31.5765	21.1781			1.60158	52.8372	22.1961	3.21073	2.56729	19.2346	0.996885	9.21671	9.32049	29.192	80.8457	28.6625	12.4495	1.64887	11.6582	5.4303	27.6669	15.5754		12.9912	58.0642	15.1454	15.2087	33.9804	18.4726	15.9724	31.0669	13.7944	21.732	25.416	16.8862	18.262	3.53533	58.1569	11.1832	24.6734	4.55691	7.60398	57.4062	25.7469
		2580	19.9673	43.037	14.0225	30.5963	17.4786			0.207764	52.1047	13.4405	3.24037	1.98551	20.416	2.57483	10.3551	9.47667	27.2548	80.3335	29.2699	14.2306	1.72581	11.8637	4.24699	21.7279	15.5723		20.4168	62.7725	14.4571	15.0805	30.5338	32.2041	14.1347	23.7728	15.0926	21.6993	21.0256	19.2019	18.6665	3.36829	59.9205	10.5072	25.5883	7.75282	4.97254	62.2655	21.2274
		2590	20.3465	40.488	14.196	31.5321	17.928			2.67544	52.3599	13.5063	5.02001	2.44032	24.558	2.44939	9.23461	10.1473	28.6235	79.8131	28.9428	15.4689	1.28885	14.962	4.37915	18.6545	18.5517		19.5325	62.1265	13.2888	16.0602	30.6275	28.4217	18.5894	32.6959	15.4092	20.6929	20.416	16.6731	20.7527	4.15768	58.1333	11.3872	25.7416	6.69654	5.19277	61.8578	17.361
		2600	20.0593	36.5782	14.3693	29.5248	18.9861			2.36728	54.8243	14.7653	6.17397	2.88723	20.6707	2.40309	8.86789	7.50325	27.9429	79.7964	29.8074	16.3689	1.69373	11.3126	6.70062	21.1054	16.9435		11.6549	60.6727	13.3911	17.4285	35.3534	28.6726	15.6444	30.1181	18.0356	19.7363	21.7581	15.5255	20.5792	3.89338	60.2615	10.2445	25.0661	3.34131	0.878656	59.7455	22.3198
		2610	20.5411	38.9071	12.7364	31.5866	20.5026			2.09348	53.0499	22.436	4.0385	2.92769	23.4765	1.81685	7.30053	9.9714	28.089	82.3122	28.0199	14.2782	2.35664	12.2428	4.23989	21.6734	15.5969		13.9044	55.8863	13.7369	13.7926	33.6881	17.6111	17.5952	29.6566	19.1271	18.5686	24.5353	16.1953	23.6851	3.98502	50.8648	12.1535	28.8783	4.82028	2.35384	54.7818	20.8152
		2620	19.7092	40.7678	15.1887	31.6682	21.6807			1.48844	51.7333	18.8164	3.29791	2.65739	23.0056	1.74717	8.95921	10.3467	30.2238	83.548	28.8359	9.4559	2.01203	11.6377	6.27118	27.3041	18.4157		21.5332	60.416	13.9838	12.1945	29.4193	20.6758	16.1526	25.1228	17.2004	19.1492	24.0609	16.0796	23.8271	3.65568	55.1729	9.38826	22.1533	3.81223	3.99888	59.6086	25.9862
		2630	21.5777	36.134	14.7431	33.0571	19.2985			1.30739	51.6419	13.8696	4.56626	3.50187	21.3556	2.5982	8.02908	11.3606	32.8636	81.2543	29.8681	11.9097	1.64975	13.8793	7.99783	28.4255	16.4341		17.3003	62.6196	13.9496	10.4951	30.3404	23.0507	17.4717	33.8091	16.8529	20.4275	23.9541	15.9797	22.7953	4.51935	66.6255	11.4674	18.9726	5.48688	5.12594	61.7062	28.2184
		2640	21.6949	37.1196	15.0236	31.9339	19.2739			2.33319	52.5649	29.2771	5.12019	2.78651	21.8014	2.5553	10.1757	11.0087	31.1698	85.5281	28.9239	16.3668	1.699	14.1334	8.28903	28.8407	18.7129		17.9148	61.0332	14.2083	13.6365	31.6327	29.9468	16.7251	37.2641	14.9238	20.2347	22.9718	16.1549	22.2588	3.49888	64.3273	12.5685	20.4199	4.35382	3.60243	59.7939	27.5458
		2650	21.086	34.1056	14.9939	33.298	18.4261			2.20018	52.3756	30.4367	4.47423	2.95366	21.0959	4.22348	9.41526	7.75578	29.551	86.7801	29.5914	14.5783	2.31015	12.3903	9.28058	28.1718	17.1455		25.6335	58.7514	13.9392	13.9323	28.8275	24.5071	15.167	29.7172	14.331	21.3353	21.1951	13.0698	20.1343	4.002	58.5596	10.9082	20.8941	6.51181	3.99168	57.9835	27.2743
		2660	20.9535	35.7895	15.242	32.2084	21.5214			2.44069	53.2567	36.4604	3.90557	3.46915	18.7713	3.44967	8.42737	9.86247	28.4714	80.7706	28.9627	13.6937	1.65439	12.0647	4.34947	27.5463	16.4734		28.1674	56.9367	16.3297	14.4076	30.5604	23.2448	15.5177	27.1497	15.3484	21.5923	25.1287	15.7695	18.4575	4.05605	57.4505	9.66292	22.4918	5.33646	9.21016	55.9107	26.7558
		2670	19.673	39.0944	13.1654	31.9203	22.6795			1.82156	54.3718	12.3321	7.04264	3.15954	19.4961	4.78132	7.74842	9.10669	30.5305	86.3882	29.4518	14.2581	1.44536	12.3584	5.75981	36.4531	17.8681		32.4481	59.3003	14.9661	9.95636	36.3538	18.8176	15.9391	24.3866	18.6094	20.6628	28.8238	13.3104	25.3302	3.60162	59.6518	9.96527	20.6441	6.86755	6.98421	58.2657	35.1274
		2680	19.58	40.7402	13.1484	33.0135	24.6024			1.95927	52.87	15.4374	4.78603	2.68364	20.7975	3.39775	8.20224	8.26998	30.2188	72.3575	28.8217	13.1182	1.35564	11.7202	7.80632	24.2908	17.2845		24.6375	60.7645	16.3742	10.8897	35.1352	26.7769	17.3241	27.12	15.1991	21.1618	21.0089	17.7524	22.6927	2.6231	68.4609	11.2139	23.468	8.29718	4.86047	59.642	23.4106
		2690	20.8472	40.4322	15.0418	32.8679	23.3612			2.06395	53.1939	17.4757	6.78977	3.45237	19.9182	3.66328	7.75158	8.55781	28.6619	76.5312	29.5678	13.3448	1.74236	13.1294	6.87565	23.6883	18.5943		14.2432	50.8815	13.6878	15.4783	26.9527	30.3872	19.186	31.2541	14.8982	19.278	22.4835	16.2711	18.4845	4.26916	66.8472	10.1966	22.1981	6.50569	8.32554	49.9744	23.8818
		2700	20.1374	42.3496	13.9805	31.7452	25.3778			1.68493	53.7495	8.24478	5.18501	2.75237	18.7506	3.35396	9.47026	11.2053	28.0318	85.8303	30.2701	16.4686	1.56378	12.1263	6.51317	28.0439	21.0564		20.396	57.4086	14.5539	14.7739	28.8273	26.5526	20.1248	24.0184	16.2673	19.7372	25.7812	15.1321	26.0006	4.15318	64.718	11.2255	26.1923	5.02616	8.3862	56.2048	28.2585
		2710	18.9765	42.6491	15.6167	32.9784	22.7843			2.19132	54.3462	11.951	5.34238	3.35868	17.3331	3.10101	9.35013	9.50446	29.3383	83.4611	29.8127	19.8966	2.42306	11.9093	8.69691	23.9098	18.5921		12.2639	51.4527	16.3373	16.6344	31.1167	32.1417	18.9103	21.3581	15.0354	20.9924	20.6626	14.6082	19.6663	2.56916	62.5878	12.3022	20.4187	8.23931	4.74491	50.2861	22.8087
		2720	19.5098	41.4282	15.858	30.767	21.9694			4.51002	54.7798	21.0629	1.60996	3.35079	19.1169	2.234	7.84105	10.1002	29.819	76.8986	30.8197	15.9477	1.9891	13.0574	9.25343	27.0041	16.5477		19.6671	56.9375	15.5421	19.1241	33.2389	35.1178	18.817	32.5416	17.8078	21.1914	19.0261	18.3502	19.3596	3.10886	63.6393	10.5438	19.8505	4.64779	7.61673	56.0543	26.9672
		2730	20.2081	40.0535	15.2218	33.1472	24.3183			1.75861	56.0945	18.4499	3.84768	2.77231	19.8809	3.13133	9.66566	8.59716	27.8769	82.3733	29.8673	13.5531	1.18058	13.5903	9.9482	30.7136	17.4075		20.6123	57.9329	17.2327	16.3797	33.6251	25.2471	19.1942	37.56	17.9596	21.0566	18.1974	17.0774	22.7327	3.46092	63.4085	12.4614	22.846	3.37489	7.54085	57.1974	30.423
		2740	20.3785	41.1894	14.5456	32.6097	24.278			1.54817	55.4234	15.0073	5.86425	3.10359	20.7254	2.54554	8.55566	9.60629	28.3656	84.8683	30.4444	14.3833	1.49248	12.6316	7.52197	30.9873	19.8347		16.0696	54.0081	15.9208	18.2678	33.6308	31.2579	19.1726	28.96	14.2466	21.6212	16.7466	13.5046	21.8478	4.34944	66.2818	10.2671	23.7927	6.25734	7.14892	53.2775	30.0607
		2750	21.4885	38.1944	15.2729	31.9533	25.0959			2.48324	54.4433	17.911	7.00122	4.70516	19.1418	4.03562	9.23211	8.00162	27.9168	81.4253	29.7447	17.3333	1.86253	13.4518	8.57236	26.965	19.7949		29.1954	63.1732	13.5215	12.6311	30.1073	23.2989	17.2107	31.8203	19.9018	20.9133	22.2428	14.0319	24.5698	3.23009	64.377	10.657	22.6267	7.54787	5.63014	62.4805	26.0978
		2760	20.8877	36.6073	14.6151	31.9097	25.1194			3.80123	54.8607	11.0365	4.48723	2.42582	20.4448	3.79079	9.81132	9.28296	26.4829	75.4529	29.5866	14.9214	1.87607	12.1136	10.9666	24.926	17.8499		24.6228	58.2604	14.4479	14.3425	32.2943	34.8709	20.058	29.1547	15.1968	20.818	18.6421	14.9036	21.5308	3.5829	67.481	12.0492	21.5044	6.85698	12.6168	57.4497	24.922
		2770	19.9624	37.2239	15.5035	31.5759	24.581			1.9339	54.5191	31.3272	2.66253	3.48034	16.8798	4.41032	8.39671	9.7071	27.2776	83.9018	29.9609	14.4493	1.56291	13.9418	4.72514	26.6453	18.8599		19.3187	58.9589	13.6718	14.3577	35.0185	28.0931	18.2294	26.8416	16.6733	19.0312	23.6765	12.7159	22.4624	3.76442	70.0097	13.6195	23.5822	6.70841	7.1884	58.5176	25.9187
		2780	22.4085	36.3085	14.0533	31.4786	23.4303			3.02735	52.9566	23.8922	4.32309	3.16241	18.5887	4.25307	8.37921	10.3428	26.314	77.3855	29.6384	15.516	1.82531	11.366	6.59383	25.9179	18.623		24.1108	52.4391	13.4516	13.7369	35.596	39.6553	18.1175	30.3319	16.5814	18.6461	23.1416	13.7789	21.3163	4.22647	65.7135	13.6032	20.8052	4.36643	7.32741	51.8546	25.0035
		2790	21.1294	42.027	14.0014	30.8325	24.9005			2.3093	54.3086	19.1287	4.96368	2.43615	21.5417	3.46402	8.85421	8.89452	27.9333	80.5235	29.653	15.7943	1.70827	10.3959	7.19627	26.1946	21.1571		12.5397	50.423	13.7983	14.4537	30.1165	35.2364	17.0425	23.2331	15.6522	19.806	26.9162	12.8263	23.1037	3.8221	65.6741	13.7701	22.8428	7.32548	4.91764	49.754	24.8279
		2800	19.9262	39.9811	14.9172	33.4862	23.7477			1.045	54.9576	27.3425	4.39901	2.86557	19.4343	2.95116	9.13974	9.7643	30.2557	78.5584	30.1121	15.8084	1.89524	13.6131	7.48138	15.6664	22.2959		18.2978	52.7497	13.2294	10.8105	33.3569	35.8239	16.0287	30.1456	19.1327	19.7264	22.9075	14.1178	21.3831	4.11523	66.9385	10.1233	20.5699	5.23482	12.4766	52.095	15.4154
		2810	21.1189	41.1445	16.002	31.0735	20.6843			1.61581	55.2472	25.186	7.078	2.48264	19.1146	2.36329	9.87447	10.3187	33.8628	85.5991	30.4289	17.2241	1.29925	10.6934	3.37618	23.997	22.9359		20.1405	53.1185	14.7982	16.6522	31.9431	34.9196	20.5682	23.1169	15.7839	19.6614	21.6995	17.8052	23.0253	4.23983	64.6545	12.2109	22.8883	5.88194	6.95604	52.2032	22.5279
		2820	20.71	38.1663	14.8835	31.9955	20.7677			0.335537	54.5277	16.9826	4.33679	1.81851	18.8533	4.43783	9.37671	8.35375	30.6013	86.8525	31.6129	18.5809	1.54411	13.4421	9.02438	24.2211	20.7963		26.5228	59.5925	16.2519	12.76	31.6462	41.1607	18.7445	25.3006	17.6588	21.5866	21.4014	14.3017	25.6616	3.36255	68.0963	13.2987	20.8484	3.81446	9.3212	58.8078	24.645
		2830	20.9187	36.0962	14.8756	33.2254	21.4156			0.584236	53.1664	25.1311	3.00136	3.5561	18.4484	4.11032	8.98474	9.54037	29.0976	83.4774	31.4452	17.5454	2.41078	11.4864	6.73664	28.0214	22.0347		8.60392	55.6043	15.6437	16.8716	32.5602	22.016	15.7879	23.9125	16.0668	19.9433	23.3781	13.945	20.4841	4.29164	72.2064	13.0336	24.4839	6.31613	7.87109	54.9633	27.7664
		2840	20.6484	40.9772	15.5328	30.9349	20.2142			0.436869	53.886	25.9405	6.43533	2.61306	18.687	2.66447	8.38711	10.1682	27.9512	84.9149	29.4234	14.7481	2.56792	12.0285	3.83835	23.1092	22.6736		18.0179	55.0816	14.4457	14.7521	31.22	26.735	15.4683	14.3247	17.1939	19.8396	23.6391	15.8382	19.8084	5.20437	70.2484	12.1111	20.0916	4.89559	7.47361	54.4615	22.1203
		2850	20.9638	40.158	15.2385	31.028	24.1998			0.751468	52.8455	13.5782	4.95709	2.58164	20.7945	2.59155	10.1182	9.09249	29.7221	87.367	30.3433	16.3405	2.58847	12.5611	10.2939	29.1122	21.088		22.9863	48.6401	15.1236	13.5539	33.1567	30.4526	15.1629	22.74	15.5108	20.8828	22.9626	15.731	22.481	4.42996	72.3731	10.2844	20.3327	8.71468	5.00359	48.2773	26.9108
		2860	21.8861	38.0352	15.4222	32.4819	23.6812			2.02355	53.6364	15.9485	3.98478	2.95696	20.6782	3.39598	9.43066	11.1499	26.0357	93.9787	29.7424	12.8725	1.09887	15.5307	5.28166	20.9724	21.3672		23.0223	52.0973	14.5354	15.6374	37.9774	31.0288	14.7619	23.0666	17.8076	20.3378	25.4511	16.6124	18.6698	4.27241	64.7429	14.057	22.1932	8.21706	8.37818	51.6029	21.0447
		2870	22.0721	38.1849	15.7565	31.1644	27.7817			1.71298	52.8289	18.6958	4.43714	2.89598	16.8599	2.21196	9.68697	8.64361	27.4313	86.0647	29.5113	18.4619	1.47569	13.3326	13.3843	22.2274	20.3985		21.6012	50.0072	14.7912	13.8139	33.7527	30.5438	13.3207	23.7803	18.8688	21.3658	24.6049	15.9204	18.2173	4.06442	64.146	11.5933	24.7895	5.55383	5.51561	49.2492	21.7201
		2880	21.3617	40.6641	16.4375	30.2684	26.1223			1.8064	52.0821	11.7681	8.90755	3.13056	19.4304	3.27852	10.4078	7.15619	27.236	90.9362	30.2504	17.3855	1.50752	12.809	8.55004	16.5656	21.0398		18.4263	51.174	15.815	15.1686	31.3251	28.096	15.5797	26.6284	16.763	20.3322	15.8988	13.3396	15.4208	4.85868	63.9112	13.5342	25.2928	5.62561	6.98792	50.2645	16.0304
		2890	19.6505	34.6577	15.2142	32.045	22.3535			2.05416	55.4379	22.8953	2.32438	3.52396	17.8303	2.18504	10.945	6.86613	26.6652	90.5348	30.1403	16.7783	1.17556	14.5535	10.2879	23.5561	22.9592		27.8998	53.5145	14.3747	13.7189	29.1079	29.893	16.0809	25.8947	18.1049	21.2743	29.708	18.472	15.4453	5.14395	68.4188	13.0784	20.2003	5.42419	9.37096	52.4196	23.571
		2900	20.1927	36.9526	16.8358	31.7413	22.6985			2.17334	55.3576	22.8366	3.56794	2.9406	17.6141	4.34626	9.64316	9.40243	26.1628	90.5457	28.481	15.7299	1.55313	14.4424	7.41112	21.1469	20.7975		18.278	48.0998	15.3828	11.952	25.6776	29.0639	16.3563	22.4903	18.3774	22.4704	32.1101	18.747	16.1261	4.19488	65.07	12.218	18.1171	6.30241	2.99191	47.4872	21.5049
		2910	21.9694	33.4728	16.2577	32.3408	18.1479			0.585176	53.2981	21.646	5.08847	2.80359	20.2082	3.56698	11.2514	8.03367	28.1286	79.8697	29.2086	11.9665	1.42494	14.7856	9.03935	22.2455	22.3107		11.083	56.9784	16.3167	17.9394	29.4376	40.3833	17.5485	24.2384	18.5825	22.8802	26.6666	16.7307	16.9425	4.52372	60.118	10.4366	22.554	4.75518	5.36817	55.4812	21.4455
		2920	19.588	35.9706	16.5762	31.5337	20.8203			1.20592	54.8277	19.2931	4.3101	3.33386	19.0353	3.41328	11.303	7.95923	28.0267	80.0385	30.2641	12.5912	2.02569	11.4535	8.10995	19.4821	21.636		27.2811	51.8267	13.9223	18.5182	22.1857	23.6584	13.9469	14.8938	18.3067	22.1652	28.0904	14.2179	18.9973	4.8774	61.2263	10.9072	26.2234	6.66278	6.27376	50.4347	18.7661
		2930	20.0112	40.0299	15.4877	29.6219	15.4089			1.65809	53.1172	22.2472	3.77471	2.29139	18.8561	3.89553	10.9579	7.01095	29.9969	85.5403	29.6335	14.2336	1.22932	13.1285	10.5164	25.7588	21.2382		5.30914	53.7653	16.8687	13.1014	25.9022	24.4311	14.5366	21.4841	18.5269	22.1598	27.2788	17.3099	17.1137	5.89551	60.3416	10.3644	23.6722	3.54348	5.96614	53.035	24.9024
		2940	20.2918	37.2351	16.698	32.0529	23.6974			2.04892	52.4704	22.3578	4.46054	2.54907	21.6483	3.0732	11.0934	7.30426	29.2392	87.0416	29.9085	13.7327	0.726692	13.5958	9.06294	26.9726	21.2167		22.2402	51.0101	13.9505	10.9718	25.3978	33.2531	18.1514	24.81	16.6558	22.6859	31.9824	17.208	17.809	5.13858	60.8184	12.2745	22.5358	4.79135	5.09407	50.2706	26.2087
		2950	20.201	39.7344	17.8833	32.1611	21.5069			0.992249	52.8489	15.6624	0.593271	3.65466	20.3564	3.67482	7.95908	6.73002	30.1273	86.1851	30.1255	14.9226	1.40514	12.8102	7.6077	23.4653	22.3406		13.1197	48.0315	16.1064	9.04124	26.0554	33.0873	16.0084	31.1903	16.641	22.1081	31.0205	16.7142	18.4573	5.63371	63.2975	11.1022	22.4874	6.49697	8.6385	47.1315	22.6011
		2960	21.5643	39.787	18.4717	29.7166	21.2486			2.23602	51.409	14.1885	2.45264	3.74907	20.6945	3.6263	8.33355	7.19148	30.6391	88.0195	29.5734	18.0607	1.59424	13.5881	8.96934	21.4111	19.6906		13.9644	52.6572	15.0428	15.7772	26.7991	24.122	15.1083	22.2797	16.0596	22.309	25.6334	19.5802	21.1592	4.52522	62.0961	11.3297	20.1003	8.33001	5.59087	51.7965	20.7127
		2970	21.7124	42.7543	17.0088	30.9935	20.6346			1.43167	49.7209	0	7.54232	3.67676	19.8602	5.04478	8.99697	9.36592	26.9485	90.1964	30.8051	15.091	1.69211	13.5261	5.59518	22.2846	19.9912		5.86986	51.0583	13.5504	15.6706	24.0602	35.1205	14.6143	23.2406	16.374	21.4341	30.1249	16.6184	24.3424	5.68002	64.7085	13.2354	24.4301	5.4917	6.16211	50.5682	21.0862
		2980	20.5427	46.196	15.8569	32.0306	20.8518			2.46002	51.3527	16.3616	5.53962	3.63214	19.8525	3.62157	8.87605	11.5308	28.1573	83.4412	31.0734	15.6324	1.14398	12.5511	4.7122	29.8043	19.5315		18.5243	58.6347	13.1411	11.0126	24.3319	29.8473	14.8094	25.7531	16.665	19.8476	30.7031	15.8013	19.6186	5.35793	53.1685	11.1594	22.2077	7.89303	6.08993	57.2567	30.155
		2990	22.0767	48.7856	16.5827	30.7508	16.2645			2.2128	52.979	12.572	5.37462	3.68838	21.6024	3.30263	9.23526	10.4649	25.6107	86.8122	31.4991	14.0463	1.14549	12.9348	10.1785	28.5122	19.6886		11.4025	58.3406	14.072	9.46255	21.2393	21.4023	12.6116	20.8672	15.4318	21.9993	27.2193	17.3107	22.1876	5.37054	53.5253	11.6428	20.8428	3.76642	9.01296	57.8901	27.7295
		3000	21.5887	49.7516	16.1509	30.991	18.754			1.65259	51.2352	17.638	1.56819	3.75323	22.5991	4.80617	8.76711	9.8856	28.9785	87.8615	29.4951	10.7124	1.17494	13.0319	8.78518	22.8198	19.5892		17.0011	52.812	14.3161	15.5385	30.8892	23.2596	12.0105	26.0484	15.4056	21.3494	28.5099	16.1333	22.748	5.397	57.4039	13.9052	21.8713	6.68523	7.10533	52.6877	21.9612
		3010	22.6095	49.7066	15.6184	29.9714	17.6046			2.47062	52.8296	22.9666	5.71935	3.44247	22.163	3.75026	10.4496	9.4073	28.1839	86.2045	29.3012	13.3021	1.41642	12.8837	3.42311	10.3084	19.87		33.3694	51.7482	14.9276	18.3017	35.1844	19.277	16.1623	22.3172	13.3933	22.6786	28.6908	17.1313	21.0508	4.73658	57.0445	12.2574	23.2003	4.93546	8.84455	50.9906	9.53767
		3020	21.799	50.8133	16.904	32.1209	19.1821			2.34795	53.7791	21.1012	0.773349	3.6363	25.106	3.7794	9.58487	8.61886	26.5839	80.8014	29.4817	12.832	1.25238	11.5689	10.1192	26.2656	22.6417		26.2699	57.012	17.1713	9.59002	34.8066	22.1753	14.2091	28.6903	14.2628	20.6452	29.5659	17.1093	21.0984	4.20287	53.0211	12.6117	23.7297	7.08529	4.97788	56.0182	24.913
		3030	21.6324	52.6237	14.7414	33.3917	21.6654			0.832936	55.2313	5.55285	6.58473	3.40072	24.753	2.87261	8.47658	9.07201	29.1463	89.3588	30.4738	13.6704	0.838847	13.9662	12.8506	16.4927	19.7082		28.9232	56.3687	16.7871	10.8724	37.4374	24.9015	13.5324	25.1788	15.1029	21.3998	28.5621	17.8366	18.3069	5.41798	49.829	14.8223	23.2794	4.71994	5.3912	55.253	14.9645
		3040	21.2377	49.3461	16.0911	31.3177	18.6772			0.828641	53.188	24.355	5.38121	3.47231	28.0033	3.87201	9.92158	11.0627	27.8314	80.5398	29.8023	14.8129	1.22005	12.6762	4.73351	27.8293	21.3572		15.2478	53.0256	17.1888	14.6805	30.2567	28.7522	16.0078	26.0803	12.9318	23.2589	27.5725	16.4778	18.8265	5.40974	53.6756	8.7943	22.8748	5.69146	9.17088	52.3051	27.0068
		3050	22.2834	42.9689	14.6043	30.4773	22.959			1.24323	51.2877	17.9002	5.15832	2.59914	21.2545	4.61949	9.82421	5.70122	26.3823	84.8498	30.5585	17.3704	1.47519	15.7139	7.74595	26.6038	19.6939		27.9927	50.6923	16.7752	10.6343	31.0936	35.0224	15.4565	24.0684	13.1182	21.3555	25.9607	16.0994	24.7502	4.59963	50.199	11.0711	18.6853	6.95083	10.4863	49.943	25.1924
		3060	20.324	49.072	14.1795	30.8298	24.3589			1.41154	51.566	18.9378	6.15785	3.57044	21.808	3.72852	10.9376	6.5142	26.6022	84.5027	29.5303	13.3472	0.995238	14.8925	7.13235	19.7136	18.2644		14.4626	51.5823	16.8392	11.0186	33.2569	31.416	13.5972	24.8212	15.3554	22.7088	26.9765	13.9535	21.1606	4.71136	54.3547	10.0975	16.646	4.21471	7.57766	51.1037	18.787
		3070	20.0522	49.4739	16.0114	29.7666	21.5578			1.18914	52.7144	26.2709	6.34711	3.68451	24.0701	3.06388	9.90921	8.28621	25.2569	91.9548	29.331	12.252	1.5183	13.0849	11.8301	22.3778	20.0488		15.9523	50.7086	14.5597	12.8261	29.6292	27.7023	16.0619	27.8	18.0101	21.459	29.164	14.1473	21.4718	4.22272	55.3259	10.1039	26.6507	5.34703	7.76478	49.5891	22.0762
		3080	21.4837	56.359	15.5365	32.1741	19.1356			1.70157	52.2433	25.4534	5.98973	3.24347	22.2776	3.40411	10.5117	9.52779	26.086	87.5104	29.9474	16.0969	2.02982	14.2762	7.4829	20.9339	18.806		23.5018	55.2249	17.2849	13.6219	29.3714	38.7846	14.3995	25.1125	15.8036	22.3981	27.3412	17.2737	23.4102	4.69875	56.6774	7.23406	24.286	7.53915	7.43968	54.42	19.935
		3090	21.7859	53.3277	15.0506	31.7426	22.0586			0.757105	53.0904	19.0647	7.14455	3.6891	23.7752	4.78605	8.4275	10.94	31.4059	79.9136	30.2326	14.9126	1.59712	13.9214	8.41053	22.3233	16.9902		20.7886	53.5497	16.78	10.1902	33.1079	33.4555	15.2722	26.7147	14.5106	19.6216	25.9433	14.2668	24.5292	5.0588	59.5536	11.5953	23.9925	5.02245	9.75651	52.1211	20.9526
		3100	21.1349	52.0752	16.0941	32.6279	19.2803			1.19371	53.7523	27.0942	8.77271	3.85638	20.9519	4.14183	9.33895	8.71055	29.3963	87.9425	30.3185	15.5857	0.955138	14.3616	6.53296	19.348	17.872		24.0519	53.0137	13.5631	15.1573	34.1378	29.4464	14.0257	20.7294	15.0917	19.6522	29.4624	16.5873	26.5849	4.73146	54.1474	10.8549	22.5287	7.1274	8.10119	52.0883	19.3634
		3110	20.6117	47.6277	15.3252	32.3556	19.1995			1.47166	53.0002	14.9228	3.41334	3.41793	23.2176	3.47467	9.41316	7.32028	28.7076	88.591	30.0857	16.2531	1.16967	14.1903	8.20278	23.8751	19.5353		28.7185	57.1625	15.7702	12.4326	29.2747	22.7791	15.081	33.9872	16.2634	20.4729	25.4849	13.6168	24.5712	5.00699	48.9878	7.93305	26.0017	3.93817	4.30712	56.1193	23.9176
		3120	22.4855	50.8509	16.0319	32.2568	21.0985			1.30202	52.808	11.4124	4.91359	2.9977	23.397	4.0223	8.99421	10.4444	27.847	87.691	29.3063	19.457	1.8708	11.5891	6.79651	21.2667	17.676		21.7023	56.4997	17.5006	13.7088	34.0376	34.4275	15.2136	25.1116	16.0996	20.194	23.3334	16.608	27.3986	5.05306	50.171	8.92148	26.4823	4.99834	4.55963	55.1669	20.1566
		3130	21.592	53.2084	15.8789	31.2501	23.191			0.782069	51.3215	18.6429	2.6958	3.79957	23.105	3.22113	8.48184	8.67951	30.3445	86.9973	30.3405	14.1562	1.09098	11.4946	10.16	25.778	19.484		32.863	55.2133	14.1539	12.8412	32.616	28.5359	15.2722	19.4647	12.2987	20.5836	26.1642	14.6373	22.1945	4.36717	52.8847	7.69044	29.7855	5.71316	9.73287	54.5275	24.0049
		3140	21.1687	52.463	16.3148	32.1053	23.1029			0.946482	52.6799	15.6495	2.3918	3.55624	19.5334	3.18474	8.79684	10.5016	29.4129	86.3367	28.3523	13.3568	1.92882	14.7392	7.21606	28.2547	18.078		25.0463	56.3387	17.3299	10.4274	27.4207	29.6152	15.1693	28.0622	11.7684	21.366	26.8687	19.6964	30.261	5.07803	51.5379	7.69782	21.9893	7.6189	7.90729	55.5564	27.2347
		3150	25.3958	54.2887	16.1105	32.1408	17.7968			0.435661	50.7159	27.0327	6.28212	3.25165	20.4166	3.99301	8.7475	10.1339	27.4008	87.9923	30.0211	14.0659	1.6381	13.5577	8.77833	22.9523	17.1012		28.2746	60.7955	15.8808	18.4666	24.9923	28.8532	13.3037	29.6344	14.3738	21.1878	32.4654	18.864	25.6486	4.77203	51.2986	10.0065	24.6308	5.84929	4.61248	59.428	21.7033
		3160	22.918	51.4752	14.7244	30.4991	24.4061			1.91524	53.3144	31.0056	5.47671	3.15108	20.1784	3.63355	8.62092	7.62515	27.5106	87.2303	30.0164	13.6532	1.46128	13.5688	4.07958	22.5027	16.9638		18.5355	61.022	15.0859	19.1652	22.8316	28.7088	15.4444	25.765	11.2374	21.5063	25.5259	17.8675	24.3269	5.02971	52.7101	8.24648	26.4872	4.377	10.6471	60.5645	20.8623
		3170	24.9635	54.015	16.1004	32.8834	21.7899			0.417408	52.7745	29.9186	2.60758	2.45653	20.0796	5.39625	8.93316	8.66126	28.0779	80.6443	30.2977	14.3804	1.0688	11.635	8.03436	21.6978	18.5023		27.9678	62.1657	14.449	12.2924	24.9292	40.3521	18.806	24.3297	16.7778	21.5306	25.6621	16.0049	26.1996	3.81336	46.6116	10.9701	20.7311	5.42864	10.5922	61.6698	20.245
		3180	22.5665	43.8905	15.0759	33.0209	19.5239			1.44227	51.3231	18.2312	3.66622	2.71191	20.9976	4.14375	9.70013	9.19026	28.2897	84.4104	29.05	11.5605	1.11855	11.4002	4.94506	21.0642	16.07		23.548	55.7906	15.7252	13.2008	27.5325	33.733	16.2122	25.8453	15.6394	21.4433	24.2221	14.1228	27.0949	3.96255	52.2791	10.4119	23.4699	6.86068	9.26609	55.4048	19.9195
		3190	22.8235	39.1813	16.4894	32.4641	21.7957			1.20283	49.8659	17.5083	5.41258	2.80947	21.5304	5.19907	10.2003	7.61805	29.2819	87.8869	29.5025	12.825	0.961779	13.7416	8.25681	24.619	18.7608		29.4352	56.4941	15.6792	15.1196	33.1457	33.098	15.3538	21.0822	13.665	21.1767	23.5572	15.1142	26.168	3.58689	52.5495	9.64547	23.6332	10.353	10.1199	55.8732	23.384
		3200	24.011	44.0239	14.7644	33.1983	20.1174			1.29316	49.8583	14.2559	5.14723	3.08795	18.0425	2.01196	10.9195	7.29574	26.6492	87.6557	29.0831	13.3638	0.760526	14.7793	7.13945	16.3534	18.5804		15	57.6982	13.5001	10.111	32.7624	36.858	17.7209	27.9638	12.7946	21.8105	25.5094	16.9237	30.308	4.14045	47.9286	9.55923	24.1925	10.2745	6.53471	57.2962	15.4282
		3210	23.4136	48.5945	16.1144	30.1999	22.0974			0.736704	49.7506	21.5271	3.90401	4.06987	20.4024	4.50484	9.19145	9.09655	25.696	84.9665	30.0085	14.8084	1.4307	14.3545	9.07841	19.6848	19.5918		9.87013	56.3952	15.4509	14.8323	33.2532	28.0402	16.0206	27.0434	14.8338	23.149	24.0908	16.3223	28.5394	3.62185	59.1959	8.2302	28.6752	5.07142	5.79259	55.3663	18.2957
		3220	23.4347	51.38	15.7548	30.6047	20.4011			0	53.3737	15.9364	3.45078	2.75352	19.8172	5.097	8.40737	7.85375	27.8039	90.8656	29.5574	10.5018	1.10927	15.1857	12.5134	21.1103	18.5455		27.3121	55.8482	14.3091	13.7047	26.6844	28.4313	15.3605	27.7441	15.1139	22.534	28.1871	18.1854	31.0255	4.98864	54.2139	8.67148	29.4869	5.19865	7.27724	54.795	21.2279
		3230	23.638	49.4215	16.7671	30.189	22.2341			1.12029	52.6508	26.1419	5.65921	2.71593	20.7011	2.70545	8.17803	10.3316	27.5983	79.995	30.1342	13.4167	1.55338	14.2323	8.70427	33.365	16.843		16.9361	54.5158	14.8499	10.6746	30.9829	28.617	16.8969	23.0547	12.7861	21.7042	29.9656	18.5269	27.851	4.41448	52.9507	9.63507	27.0073	3.97916	12.0071	53.0438	32.2737
		3240	23.257	53.2551	15.843	30.5387	23.2346			0.580881	53.1994	31.9079	2.70672	3.15552	22.3408	3.58518	8.35224	7.16592	26.9011	88.5778	30.7937	12.1729	1.94449	18.4251	12.3826	26.6715	20.2943		27.1359	56.9573	15.1354	10.7855	28.1796	23.851	16.9501	30.07	12.981	22.6602	28.5447	18.3431	25.5055	4.52397	50.7317	7.87215	28.8678	7.1721	9.78016	56.042	25.407
		3250	23.649	54.3377	15.511	32.4282	19.2428			0.782337	54.7213	12.6227	4.04717	2.97747	22.0226	3.00545	9.28711	7.62191	29.2469	89.8919	29.9634	12.278	1.82845	17.0351	7.77791	23.3214	19.0496		14.8374	59.8335	13.2993	12.0603	32.8455	32.3958	13.42	31.8969	13.172	20.5761	25.4715	17.5272	25.2657	3.7412	47.1923	8.09027	28.6058	4.9056	9.52251	59.157	23.0883
		3260	23.139	59.8935	16.5209	31.8809	17.7679			1.44992	51.1822	15.6478	6.4076	2.55337	20	4.01461	8.79539	6.56146	26.7831	82.1905	29.2259	13.8033	1.69975	11.9913	7.36901	29.7425	19.4201		14.0004	56.3388	13.5471	10.8343	32.1536	31.7441	12.2909	22.6497	12.9736	19.4457	28.2838	14.144	28.0198	3.67603	48.7872	9.83742	25.575	5.89232	14.1549	55.5938	28.6217
		3270	23.2803	57.4634	16.8025	31.9828	20.5541			1.02003	52.5596	21.7333	6.5492	3.17704	23.1442	3.13192	9.24513	11.2469	27.9431	89.157	30.3188	12.9689	1.13221	12.0348	8.77351	30.5821	19.5805		25.6045	56.9514	14.7331	8.09443	35.3884	31.4832	14.8179	21.0212	12.7915	22.7935	27.1202	20.6865	28.5522	4.34407	51.7373	8.9505	28.8629	4.12031	9.22619	55.8845	29.6539
		3280	21.0501	56.9049	16.4197	30.794	20.8387			1.16378	52.6987	24.8408	6.67798	2.79326	23.0599	3.4516	10.0276	9.30527	26.962	93.2335	30.5674	13.887	1.96504	12.9688	6.0297	25.5293	19.1215		15.7654	54.7612	15.0355	10.0629	39.0914	27.1537	13.3555	34.0753	16.1453	21.7082	32.3774	20.7127	30.0822	5.19588	48.8366	8.95872	27.0993	4.27369	10.2675	54.1751	24.7759
		3290	22.0915	54.548	16.3322	31.4268	19.92			1.64896	53.0524	31.5595	3.43847	2.49641	20.1246	3.0087	8.70461	9.0503	29.2961	83.2271	33.0526	14.9221	1.47469	13.3935	6.98827	24.5146	21.3132		14.3041	57.4673	14.1642	13.449	35.3705	23.9699	12.7083	34.5703	14.0637	20.883	33.9435	18.0574	27.6059	3.6829	50.6242	9.68557	22.6678	8.10967	9.4491	56.1958	23.0572
		3300	21.8949	54.7398	17.0918	30.7822	20.8761			0.29997	53.5481	20.7319	4.49572	3.1911	20.0003	2.89894	9.51474	11.373	26.7473	84.3724	33.3736	16.4592	1.06278	14.2552	8.20786	31.4428	16.8321		26.0271	59.2069	13.7708	13.4226	34.4347	30.5923	12.2437	34.0087	13.2942	21.572	28.1861	19.4524	33.469	3.3221	55.6986	8.9344	23.4855	7.51838	12.5804	58.2911	30.6233
		3310	21.2477	56.28	18.1883	31.1967	18.87			1.42778	53.1783	19.8481	5.60947	3.07877	21.5622	3.35456	9.75921	9.13266	29.1851	82.7489	31.2296	15.4991	2.03108	11.8905	11.5001	27.1366	17.7332		16.9361	68.5327	13.7409	12.5085	36.638	27.9837	13.364	29.2116	12.8765	20.8854	29.7955	20.0492	29.7357	4.76205	51.2377	9.42668	24.418	7.14984	5.54604	67.9195	25.8355
		3320	21.7025	57.1211	17.0826	31.3836	17.7862			0.555917	52.5286	22.8797	3.85184	3.11306	20.723	2.34894	9.25842	8.57586	28.3335	87.586	32.9931	12.2994	1.21654	11.9309	10.818	26.822	19.5701		14.1949	63.7588	14.6904	10.871	34.2982	24.7999	13.244	24.1706	14.7354	21.003	33.4242	16.8748	31.7775	5.19126	62.3139	11.0891	24.0086	6.77388	5.38976	62.8546	25.5179
		3330	22.7979	56.9635	18.4582	31.891	20.6956			0.966077	53.0231	16.0104		2.9693	22.3194	1.6451	8.16289	7.66227	28.2283	80.8244	32.0602	13.0804	1.74248	11.7992	12.2025	27.6301	20.1962		20.1867	67.7235	14.8932	10.6403	31.5404	30.5236	13.7286	29.9612	13.3079	22.4263	33.2976	18.3605	27.4259	5.86941	49.4277	10.0307	22.7052	8.66145	7.83881	67.351	25.9225
		3340	23.173	57.6712	18.3644	31.4284	21.0408			1.56561	52.5985	15.8133		3.27963	22.2929	3.38207	9.30947	8.38905	29.1123	82.7846	31.1746	16.3719	1.78133	13.0414	8.69463	28.558	20.7205		10.9225	67.1522	15.0075	13.994	28.1479	36.7523	12.9813	30.4294	14.9839	20.3425	37.1539	20.6259	26.7769	5.33109	48.2106	9.10235	22.6016	6.48306	11.8887	66.2433	27.4957
		3350	23.51	58.1087	18.2852	31.8993	24.1787			1.55286	52.2496	24.6742		3.54778	18.0431	4.70395	9.28026	8.62231	27.7576	90.6145	31.0866	14.8136	0.833584	11.389	11.791	19.5848	17.765		17.9336	72.1551	15.6478	11.2119	23.3705	22.744	13.5154	25.9953	14.5991	19.2108	34.9842	16.7888	29.2829	5.16042	50.1658	11.928	17.7584	7.09661	8.1964	71.2893	19.597
		3360	22.422	61.1445	17.3615	33.462	26.518			0.272724	51.5275	19.3383		2.76413	20.8451	3.37438	10.0075	9.92353	26.2009	84.6475	30.7114	14.448	0.375188	12.2917	10.7589	19.258	18.3283		14.5484	62.0877	14.1344	9.1375	28.962	30.3741	14.3372	16.0797	10.5798	19.627	33.4739	16.7274	28.0206	4.69725	46.4087	10.6037	21.8885	6.01937	8.79766	61.7407	19.0542
		3370	21.9458	56.0673	17.0669	29.6159	22.3723			1.39422	51.5924	14.1599		2.4967	19.124	4.97732	10.5376	8.47485	24.3564	89.9588	31.0528	13.8318	1.52243	12.9037	2.6558	29.4051	18.0965		21.939	65.7976	14.5202	14.9473	29.8125	33.8046	14.1716	28.7191	13.6296	19.818	32.0115	15.4744	26.5708	5.10325	50.2072	10.8779	22.6965	4.38906	10.9021	65.3744	28.3699
		3380	22.4861	55.3705	17.8476	33.5649	18.7971			1.58011	50.9109	13.5897		2.76499	18.9575	3.61831	10.4641	8.17424	24.314	80.9199	32.6178	15.3416	1.88496	12.4255	7.53693	26.6304	17.4253		25.7244	67.6455	14.2029	16.9424	27.0675	27.5534	16.3754	19.0441	16.5708	21.0972	30.1278	17.9483	29.2925	4.64045	48.0739	11.2921	24.1203	5.39859	12.8827	67.0326	25.9317
		3390	21.3281	53.7494	17.8287	31.4354	22.7035			0.221052	50.4741	22.1099		2.80445	19.9755	4.64744	11.0028	7.84442	25.8713	74.4434	32.3944	15.6188	1.7886	12.8401	4.18662	14.1396	20.8072		30.6755	71.7109	13.9785	8.57504	26.5787	32.2041	14.7712	25.0234	13.4096	20.7457	26.06	16.7215	24.1614	4.77191	51.9468	8.94681	27.1923	7.19343	8.8357	70.9946	13.9675
		3400	21.0354	58.3054	18.4888	32.6433	21.4945			1.04741	48.871	20.9454		3.49857	20.1851	3.23932	8.95618	8.84686	27.3838	77.8688	33.3298	15.3511	1.28308	12.1883	6.41044	23.2482	19.3947		5.66823	74.0335	14.8636	15.8549	32.0626	31.1786	15.8892	21.8859	13.95	20.5901	26.7612	21.2418	26.9094	4.22884	49.4882	9.6901	27.5591	4.39462	9.96399	73.112	21.713
		3410	20.7174	53.7537	18.2038	30.7915	24.2402			0.807704	52.2471	24.5501		2.45294	20.7401	4.30913	10.1768	9.16937	26.0797	82.0213	32.9697	11.9776	0.917293	13.0666	8.74181	21.4314	20.6258		16.7147	68.9661	15.8236	9.83801	29.1626	32.753	17.3804	20.8966	14.1901	21.8554	28.1501	18.808	25.2406	4.16617	53.8507	9.37483	21.9344	8.67833	5.57688	68.4524	20.6011
		3420	21.1546	53.4688	18.8897	32.4613	23.2586			1.13264	51.1073	21.0337		2.61564	20.5611	5.2541	10.9379	10.5712	22.9031	81.6747	32.8942	13.348	1.37381	12.0547	9.93095	24.9038	19.7754		19.1831	66.4802	15.758	8.39379	30.8734	38.3798	16.6466	29.5569	14.1078	21.2618	27.4762	20.3709	25.5363	5.14232	53.3942	9.86426	21.542	8.76699	5.88924	65.0067	24.174
		3430	21.6181	53.3665	17.5358	31.2608	26.2807			0.619669	48.0897	37.8602		3.17088	22.269	5.19374	10.7139	9.90487	25.2902	81.6516	29.8667	14.1114	1.13108	14.2496	8.08179		19.3351		20.2995	74.316	16.3635	12.1592	33.4233	39.671	15.1393	26.7747	13.2401	20.9737	32.1647	16.7781	24.3788	4.24956	59.0267	7.93037	23.1425	6.55948	8.36913	73.4452
		3440	21.8875	55.5996	19.5503	32.0489	25.0162			0.772674	50.9908	24.5626			20.4627	4.15425	10.8467	7.21237	24.623	83.5041	30.4579	15.5689	0.987343	14.4076	6.90304		19.4016		19.1597	67.874	14.2436	16.3298	25.5035	30.8154	17.9875	25.4537	14.1491	21.1864	29.9113	17.4049	26.1829	4.29401	51.8611	9.77953	20.2629	6.66427	8.67943	67.0061
		3450	21.3689	55.1839	18.4672	33.7094	24.2213			0.735496	49.4566	11.1099			21.6898	4.08073	10.7353	7.86552	25.4571	87.9946	30.2938	13.2842	1.34135	12.6725	6.48222		21.0991		11.8357	71.2283	13.188	7.39273	29.0538	33.1411	16.0027	22.9472	14.1697	21.3223	27.1247	17.8366	24.12	4.10062	52.7646	9.20956	17.3012	8.21298	10.5535	70.7208
		3460	21.5093	54.3517	18.234	32.1785	21.0671			0.441029	51.2639	31.4899			20.7408	1.3136	11.7933	7.26268	24.4158	89.7995	30.5398	13.7862	1.78321	13.0664	7.64398		21.1558		20.3045	75.9463	13.7361	9.80512	34.6495	22.7313	16.9193	28.4884	14.7269	20.5241	33.4388	20.9395	32.4231	4.7618	50.7052	8.02953	21.749	5.89195	9.90477	74.5323
		3470	20.6839	54.0909	18.5795	31.5072	23.2529			0.977083	51.3123	20.7855			18.165	3.66535	10.7937	10.4446	24.6172	78.5552	29.437	14.0544	1.87657	11.4458	6.70544		20.0048		17.3724	74.3315	12.8032	10.8952	34.0431	32.0204	15.039	30.1034	15.241	19.0292	34.7016	15.1376	32.4745	5.09775	58.0108	9.34715	14.0615	8.78739	9.61504	73.2831
		3480	21.5776	53.8226	18.1842	32.2944	20.7806			0.870785	51.296	12.6937			19.5908	2.78341	10.3741	8.44929	25.5465	81.2787	31.2715	14.7339	1.56429	12.0032	8.59164		21.1732		26.2338	73.2973	11.8011	10.2286	32.9374	30.6086	17.5953	29.1659	13.1908	18.8178		19.3646	22.0751	4.43608	57.8957	10.2052	21.5105	5.36669	5.70088	73.1177
		3490	21.1374	52.2229	18.2727	31.021	24.9266				49.5812	16.9739			20.3644	3.98428	11.1424	6.26105	23.5231	86.3222	30.9303	14.6656	1.52481	12.744	3.16514		19.804		27.848	69.5759		15.0217	27.1549	27.6678	16.207	22.0959	13.7412	19.1547		20.2553	24.8031	4.63695	58.8188	7.36728	17.5248	7.50966	2.74331	68.7388
		3500		49.8717	16.6735	31.7672	21.3064				51.785	6.54485			21.11	3.7297	9.13329	7.56369	25.592	88.9045	30.993	15.7039	0.756266	11.8046	6.18062		20.7225		16.0447			12.3431	25.738	25.4233	14.0035	24.9609	14.0426	20.4925		18.9137	27.0398	4.26117	54.8613	8.16678	21.3708	6.59026	5.04944
		3510		52.7759	16.3693	30.269	21.9078				51.3405	11.3143			22.6868	4.84374	11.898	7.28803	25.7459	82.5661	29.9482	15.477	1.06892	10.874	11.8976							9.37661		27.3692		33.4363	16.5285	20.1355		15.2953	24.5547		55.436	9.03104	21.5497	5.79495
		3520		50.114	17.5372	31.4883	25.9216				51.4143	12.5831			21.5036	3.0834	11.022	9.68682	26.5772	86.6923	30.438	14.9661	1.63734	12.0859	7.22772									23.9045		27.0503	12.678	20.5867		17.6473	26.6237		54.4654	8.51342	20.2348	7.01852
		3530		50.3574	17.3407	33.1936	18.3865				52.9813	29.5341			19.5834	3.30101	9.6625	12.1089	27.2025	86.3973	30.541	14.1229	1.67632	9.55874	5.23524									29.0981		28	12.7051	20.0025			22.2447		57.189	8.94128	23.1932	5.17565
		3540		51.0232	19.0279	31.1245	21.8997				53.1178	10.3338				3.37275	11.0696	9.01582		80.9928	31.296	18.3743			7.64068											26.5666	13.6036	20.1919			25.3559		58.6896	9.42668	21.5797	5.28953
		3550		52.687	19.0971	33.4952	23.6434				54.1229	10.3936				3.90514	10.1205	8.89939		84.1778	32.5611	15.3522			8.53279												15.1249				27.6773		54.2174	10.2034	22.6545	3.3428
		3560				32.5751	25.8919				55.0464	21.7309				3.41816	9.95947	9.57586		79.4471	30.59	17.5534			8.60483												15.843				26.6349		52.5725	8.81074	21.853	7.2346
		3570				31.8525	20.0121				55.9791	20.3547				3.75618		9.20325		75.1516	32.8819	16.416			9.26003												14.5482				25.9065		57.772	10.2701	21.6691	6.36436
		3580				32.0944	20.4003				54.4808	19.6113				1.81152		12.2347		85.5751	32.1532	14.7311			6.8929												15.787				21.3012		56.824	10.2374	22.2253	6.14234
		3590				32.1066	24.4716				53.6102	24.4534				4.87081		7.9998		83.6348	31.2016	14.1948			9.53576												14.6292				27.3467		52.5449	10.2567	20.4857	5.63173
		3600				32.0956	19.5859				52.6985	20.8147				2.67764				88.7217	29.3357	11.9022			9.22021												13.9599				24.0114		47.8971	9.60638	19.81	7.14168
		3610				33.1649					51.8978	28.3453				4.39715				87.7376	31.7364	12.6451			10.7838																24.4214			8.58943	20.7388	7.45272
		3620				33.0665					52.9532	15.9976				5.14626				82.0493	29.7384				10.4979																30.4622			5.74077	22.6491	5.63785
		3630				31.3222					53.505	5.1735				4.7544				76.8579	30.4285				9.38483																27.322			9.95856	24.3334	5.97412
		3640				29.9885					55.1555	22.3265				2.73992					31.1224				6.12127																24.5525			7.84362	24.242	5.58499
		3650				29.6787					54.8084	16.7521				4.447					30.7614				11.6125																24.0388			10.0554	23.6378	7.47924
		3660				31.5053					51.1477	19.2876				4.15736					31.4838				12.0079																21.5988			8.34899	23.3065	4.23011
		3670				32.9345					51.51	12.4266				5.14137					30.6685				12.4297																27.2327			8.9005	24.0399
		3680									53.9647	18.1739				2.5624					30.6468				10.747																23.6165			10.8654	26.1778
		3690									52.2909	27.2076				2.50264					29.1009				11.2337																22.7965			9.36393	24.4841
		3700									51.2753	17.0275				4.24686					29.8375				6.91928																20.7759			11.3658	18.6568
		3710									52.6033	22.4378				4.25839					31.6722				7.83016																23.8316			9.22668	19.0292
		3720									53.9388	18.3578				4.09863					30.082				7.42025																24.1437			10.8453	24.7986
		3730									52.6388	10.2218				3.84494					31.962				11.3301																27.2776			11.0663	21.9344
		3740										25.1659				3.14894					31.3718				8.01761																24.3863			8.10956	19.5967
		3750										23.4986				5.55069					31.3224				7.98286																25.7802			7.2104	19.6514
		3760										30.2378				2.75012					31.2986				11.2122																27.0161			6.93322	22.6357
		3770										25.1088				3.82437					31.0246				4.63433																25.8471			10.5683	21.8038
		3780										15.4764				1.88785					30.8843				9.20017																23.1143			7.38691	17.2133
		3790										20.3985				3.9942					32.3085				7.24802																24.2635			10.9364	17.7668
		3800										21.9499				4.26816					27.6107				8.70807																25.5761			9.93624	19.993
		3810										18.6592				3.75633					31.4975				6.94946																21.4245			9.24732	19.1853
		3820										18.4145				4.99862					30.9859				10.6262																22.0849			11.5941	18.7804
		3830										18.8839				2.94657					32.3708				9.66816																22.0125			7.7693	17.6133
		3840										15.8258				3.10974					31.0151				4.35885																23.1092			8.59178	16.8734
		3850										20.5515				5.2288					29.9982				9.02869																18.9539			7.29128	17.3428
		3860										32.1387				3.37364					31.0634				9.15375																20.2737			8.82584	15.24
		3870										27.2051				4.01076					31.2718				8.07646																21.808			9.23943	18.443
		3880										16.5118				4.61327					31.1255				9.63798																21.4588			8.88372	18.6626
		3890										19.5678				4.01417					32.9975				9.51191																21.4304			11.1279	16.9544
		3900										22.0021				4.72792					32.8606				8.59418																24.5418			6.13356	16.7811
		3910										11.5386				3.66003					31.1278				6.81046																23.1051			7.97852	17.4056
		3920										21.5296				4.476					33.2833				9.67349																17.5549			9.79597	17.8615
		3930										21.3908				4.11091					31.1761				8.24109																22.7098			9.1156	18.568
		3940										30.346				2.41729					32.0958				10.1022																23.198			11.4597	16.0986
		3950														4.29626					32.3639				5.0176																21.5157			9.02366	17.4733
		3960														1.87853					31.669				7.73022																23.0296			10.9956	20.8243
		3970														5.47392					31.6597				8.81689																20.919			9.96292	20.9255
		3980														3.68799					32.7185				8.80345																21.0586			6.88758
		3990														3.25219					32.4775				10.0514																22.8433			8.66745
		4000														4.48236					33.0095				9.70139																22.9525			6.39295
		4010														1.37454					33.9176				8.10386																23.0769			7.23087
		4020														3.92186					33.3116				7.41619																23.8371			6.77081
		4030														5.19552					35.2361				5.88182																25.1696			9.12383
		4040														3.41595					32.7461				7.42811																18.55			8.85738
		4050														3.74938					33.0514				10.9091																22.5596			9.05587
		4060														5.02481					33.9148				10.9382																18.6449			5.68289
		4070														1.42159					33.9746				7.32335																19.0806			7.93238
		4080														4.14523					35.1539				6.60829																17.9051			8.75537
		4090														4.89581					33.1442				6.38507																22.4153			7.69077
		4100														3.705					31.9393				6.3214																19.43			7.21057
		4110														4.55632					33.6669				12.3673																21.7488			7.40319
		4120														3.14391					31.3847				6.85231																20.1418			7.17282
		4130														3.8439					34.7995				8.3527																20.6247			5.25151
		4140														3.88029					36.604				10.5225																18.7255			6.86896
		4150														3.88029					36.7908				10.2069																20.8116			5.59916
		4160														4.47496					35.2718				7.20692																21.1751			6.79815
		4170														5.46223					36.2109				6.06014																15.3882			6.18456
		4180														3.3658					35.929				13.6716																17.9824			5.63842
		4190														3.76668					38.1382				6.89898																22.3465			9.07399
		4200														3.08326					36.1504				8.16879																17.0869			6.3354
		4210														1.03668					33.0393				8.21775																12.4094			8.78859
		4220														3.62985					35.3132				8.33469																17.1665			7.69681
		4230														2.31965					36.5947				6.98802																16.5253			9.20923
		4240														3.73577					35.4664				9.17455																18.2304			8.98926
		4250														2.96832					35.5306				7.83422																17.0037			10.8391
		4260														3.1019					34.6771				8.89121																19.4875			10.6493
		4270														2.83725					33.9678				3.77367																18.5373			6.67685
		4280														2.99302					35.2873				6.3488																16.6433			8.28859
		4290														3.05885					33.5151				8.29512																15.3488			10.3945
		4300														3.21935					33.3477				10.5839																16.8951			10.2753
		4310														4.65647					33.3032				7.03063																20.7527			6.33473
		4320														4.76298					34.9165				6.33079																			9.25134
		4330														2.0272					34.1053																							10.0002
		4340														4.73487					34.4389																							11.2458
		4350														4.09301					32.3299																							11.871
		4360														4.55321					35.0401																							6.85084
		4370														4.41475					34.3576																							9.28205
		4380														3.66713					32.9993																							8.14782
		4390														2.83148					34.3595																							9.69211
		4400														5.10188					33.3745																							8.89799
		4410														2.56921					35.5544																							8.40134
		4420														3.98221					35.2685																							9.47869
		4430														3.07379					32.3687																							6.54614
		4440														4.50543					34.7921																							9.39111
		4450														4.50543					35.7364																							4.29195
		4460														4.25721					35.1849																							10.1493
		4470														3.81668					34.0708																							4.20889
		4480														2.82497					32.8618																							6.90856
		4490														4.1902					34.3486																							9.75872
		4500														4.22822					35.8298																							8.67836
		4510														4.37984					35.9901																							8.20654
		4520														4.70336					33.571																							9.80872
		4530														2.08179					34.6366																							7.7094
		4540														2.99465					34.9933																							8.29916
		4550														4.1405					36.1627																							9.23188
		4560														4.06964					34.8488																							8.50134
		4570														3.40189					34.5613																							7.05738
		4580														3.49583					33.5674																							7.18138
		4590														3.56861					35.0386																							7.42282
		4600														2.62098					36.0467																							10.4359
		4610														2.59347					34.6287																							7.88305
		4620														2.5914					34.1595																							8.06829
		4630														2.73074					36.5356																							7.91057
		4640														3.22379					34.2521																							7.9047
		4650														3.18769					33.4644																							9.61946
		4660														5.38708					35.3743																							10.9331
		4670														3.10204					34.5734																							7.38792
		4680														4.67614					32.6201																							10.2638
		4690														6.45142					35.5243																							7.2302
		4700														4.84153					34.2218																							9.37064
		4710														5.09995					34.8632																							6.825
		4720														4.39597					33.531																							7.4349
		4730														4.08769					37.4076																							6.7547
		4740														5.39936					35.5357																							8.22248
		4750														4.75809					33.7092																							5.95923
		4760														3.14213					34.9903																							6.20906
		4770														4.78738					33.6537																							9.45151
		4780														3.83976					35.0718																							7.04228
		4790														3.44908					35.2979																							7.63305
		4800														4.84374					35.369																							8.72047
		4810														6.41533					35.7495																							9.32282
		4820														4.75913					37.7178																							4.8646
		4830														5.39241					35.0065																							7.8604
		4840														2.57217					34.8143																							6.35537
		4850														3.31491					34.0877																							11.6128
		4860														3.97704					35.4169																							6.20789
		4870														3.91964					35.7199																							6.73473
		4880														3.63399					32.8349																							10.0045
		4890														4.50529					34.2213																							12.6282
		4900														2.68888					33.487																							8.77886
		4910														6.57302					35.703																							6.90755
		4920														4.48546					35.3044																							8.35721
		4930														1.65738					34.2308																							9.23272
		4940														3.65441					34.3243																							7.51258
		4950														4.051					34.8613																							6.90772
		4960														3.67526					34.7694																							7.88842
		4970														3.57748					34.8509																							7.91158
		4980														2.40915					35.7002																							9.97953
		4990														3.70145					35.4565																							7.04648
		5000														3.97378					35.5734																							7.8693
		5010														3.81668					36.1931																							8.2599
		5020														2.95885					33.8019																							10.6272
		5030														3.44553					34.0491																							8.00101
		5040														3.24361					36.5259																							9.43842
		5050														4.92081					36.7192																							9.82836
		5060														3.43					34.5762																							7.2656
		5070														3.28873					35.0438																							7.51628
		5080														6.22199					39.3926																							5.23406
		5090														5.02155					37.1842																							7.71527
		5100														5.56622					35.1532																							7.44732
		5110														4.32481					35.1382																							6.62114
		5120														5.55868					37.3636																							4.38557
		5130														4.32925					35.5449																							6.25218
		5140														3.82852					37.154																							9.73171
		5150														2.1127					36.2935																							8.76896
		5160														4.21002					34.8861																							6.35839
		5170														5.11859					36.0866																							7.70772
		5180														1.83253					36.9636																							9.17634
		5190														3.75736					35.7956																							7.40789
		5200														5.31859					35.493																							11.0419
		5210														4.82377					36.2215																							6.00285
		5220														4.35588					36.2988																							7.89916
		5230														4.15928					34.8338																							6.77752
		5240														2.91595					37.1065																							7.56946
		5250														1.94333					37.9069																							7.32315
		5260														2.98119					37.769																							7.55319
		5270														4.06402					34.3713																							7.09832
		5280														3.38577					35.3879																							6.6406
		5290														3.93147					36.4354																							8.08003
		5300														2.89051					35.8451																							7.3547
		5310														2.29776					35.9796																							5.10487
		5320														4.31194					36.6507																							6.38574
		5330														4.29005					36.4908																							3.96661
		5340														4.45869					37.621																							8.48574
		5350														5.68856					36.8188																							6.27584
		5360														4.30869					37.6673																							5.58339
		5370														5.87406					37.5303																							8.95252
		5380														3.16299					36.9963																							6.80487
		5390														4.89078					39.7218																							5.20654
		5400														6.75645					37.1673																							8.92148
		5410														3.57926					37.5162																							8.44732
		5420														5.52821					35.9062																							8.81946
		5430														3.82778					38.4204																							8.37097
		5440														2.61433					35.9458																							7.3693
		5450														2.92882					37.7653																							4.4057
		5460														1.27691					35.7905																							5.61091
		5470														3.22911					37.8829																							7.82013
		5480														3.74982					37.8597																							4.53138
		5490														3.57807					37.1238																							7.71913
		5500														2.41699					37.0776																							7.84648
		5510														3.70588					36.7871																							6.82131
		5520														3.91417					36.5063																							6.79094
		5530														3.40722					33.5775																							6.20487
		5540														2.27868					34.0924																							7.79312
		5550														4.36239					33.0222																							8.2349
		5560														4.50085					35.1261																							6.67131
		5570														1.93105					33.1167																							7.16544
		5580														5.318					37.0129																							4.50554
		5590														4.33399					36.591																							6.02685
		5600														3.94257					36.2856																							5.99899
		5610														4.10677					36.1741																							3.8703
		5620														4.41949					34.5886																							5.23859
		5630														5.05558					33.7713																							8.59044
		5640														3.61654					36.4827																							7.95621
		5650														2.08903					37.0771																							7.00235
		5660														3.79908					37.5509																							6.84513
		5670														2.90574					36.3688																							7.47768
		5680														3.70662					35.5016																							4.21309
		5690														1.8525					36.6449																							6.91359
		5700														4.69537					36.6565																							7.50117
		5710														2.12365					37.6188																							4.39463
		5720														5.17658					38.9146																							5.73138
		5730														4.2118					37.5486																							8.20369
		5740														4.34257					37.4123																							6.68339
		5750														3.86165					35.5579																							10.0784
		5760														5.18324					35.6669																							6.8547
		5770														2.76314					33.481																							5.75906
		5780														3.81091					34.9933																							6.03305
		5790														3.79804					36.4715																							6.87651
		5800														2.44761					35.4164																							7.92651
		5810														4.44182					36.2315																							6.91862
		5820														4.17289					33.4306																							5.30319
		5830														3.55189					37.8389																							5.8443
		5840														5.46815					35.2327																							5.90721
		5850														5.51504					36.5539																							7.29513
		5860														5.23605					35.9217																							7.1401
		5870														4.26831					36.3701																							7.2005
		5880														5.48871					33.9968																							3.22047
		5890														3.80707					35.019																							5.82366
		5900														2.52231					37.5435																							6.42399
		5910														3.9726					36.7266																							6.0656
		5920														6.91325					34.0683																							5.89463
		5930														2.94657					36.4132																							5.43054
		5940														4.24582					37.5984
		5950														5.70187					36.7488
		5960														3.0232					36.5026
		5970														4.95291					36.3606
		5980														4.65188					34.7504
		5990														6.03131					36.5613
		6000														4.83398					34.3745
		6010														4.96238					33.8912
		6020														3.35825					34.3991
		6030														3.38769					36.7815
		6040														2.88888					37.9364
		6050														2.64228					36.8463
		6060														4.34656					37.0639
		6070														3.059					33.4778
		6080														4.02704					35.413
		6090														4.70159					37.035
		6100														4.83309					35.4857
		6110														4.27748					35.7428
		6120														3.54612					33.9775
		6130														6.52065					34.2632
		6140														3.88384					34.4908
		6150														3.01699					35.6118
		6160														2.43445					36.7657
		6170														4.2902					35.1914
		6180														3.83636					33.4629
		6190														4.24064					32.3475
		6200														5.04404					32.9423
		6210														4.30425					33.841
		6220														4.62215					35.4391
		6230														1.85191					35.2014
		6240														4.55869					33.3819
		6250														4.89434					32.5676
		6260														4.21683					34.2211
		6270														1.64791					38.0019
		6280														4.59168					31.8218
		6290														3.82186					34.7886
		6300														5.30483					33.6269
		6310														4.78206					36.3535
		6320														3.61535					35.1042
		6330														2.9053					33.5704
		6340														4.44656					37.2338
		6350														4.51608					35.9982
		6360														5.42954					36.6819
		6370														3.73843					34.9563
		6380														4.76505					37.2449
		6390														2.37232					36.0669
		6400														3.72659					34.4144
		6410														4.11402					32.8636
		6420														4.25218					32.2208
		6430														4.30544					34.262
		6440														5.55735					34.7599
		6450														4.02822					34.2562
		6460														4.1186					31.2051
		6470														4.21002					36.718
		6480														4.08828					34.2646
		6490														3.67009					37.4565
		6500														3.35766					34.6977
		6510														4.21446					35.5509
		6520														5.10217					34.4417
		6530														2.49658					35.5461
		6540														3.60337					34.7586
		6550														3.49361					37.1217
		6560														4.43546					37.0548
		6570														4.86786					36.8384
		6580														3.73991					38.8092
		6590														4.36949					38.5752
		6600														1.94614					36.8164
		6610														1.52972					35.5306
		6620														3.43577					35.8942
		6630														4.7183					36.525
		6640														2.98814					34.7967
		6650														2.78311					36.7239
		6660														3.85692					35.0519
		6670														3.04642					34.9532
		6680														3.17068					36.7917
		6690														4.27762					35.7129
		6700														2.64376					36.0382
		6710														2.77986					36.0655
		6720														3.85381					36.9107
		6730														3.15633					37.8202
		6740														3.39154					35.0935
		6750														3.56905					34.778
		6760														2.34317					34.528
		6770														4.55514					36.2764
		6780														2.01108					38.2894
		6790														4.85883					36.315
		6800														3.90988					36.2574
		6810														4.1791					39.4988
		6820														4.21328					35.5609
		6830														1.68771					39.1319
		6840														4.09035					37.7822
		6850														2.46166					37.5204
		6860														3.85899					38.5727
		6870														4.09419					35.5158
		6880														4.27644					36.9206
		6890														2.7908					35.1569
		6900														3.81742					34.7884
		6910														4.4754					37.1042
		6920														6.00808					37.7695
		6930														3.98103					36.8629
		6940														3.66313					40.6569
		6950														4.43487					37.06
		6960														4.19479					35.4123
		6970														5.05868					35.9548
		6980														3.18459					36.3759
		6990														5.38723					35.0129
		7000														4.0473					37.6812
		7010														3.12719					37.0352
		7020														3.66017					35.6972
		7030														5.90453					38.0533
		7040														4.99419					33.1188
		7050														3.05559					35.0602
		7060														4.48117					36.3914
		7070														4.09109					35.9217
		7080														3.11728					36.6944
		7090														3.44849					33.6259
		7100														4.17496					35.5974
		7110														4.52141					36.2048
		7120														4.93383					36.3419
		7130														4.97422					36.6468
		7140														5.06268					38.2461
		7150														4.32274					36.8143
		7160														3.42068					35.388
		7170														4.09834					38.103
		7180														5.75217					38.6586
		7190														6.93248					38.0921
		7200														4.35825					36.7373
		7210														4.61682					35.9403
		7220														3.29805					38.6257
		7230														4.10766					35.6782
		7240														5.33516					37.5345
		7250														5.65528					36.8827
		7260														5.36386					38.6621
		7270														5.21859					38.0963
		7280														5.7853					35.9187
		7290														4.20987					36.2158
		7300														2.83844					37.0072
		7310														1.2846					37.1794
		7320														2.55101					35.7496
		7330														4.93901					33.2322
		7340														1.94214					35.8817
		7350														3.79834					36.5234
		7360														2.7766					36.0857
		7370														2.88962					37.9423
		7380														1.66463					40.0121
		7390														1.7812					36.7954
		7400														3.41846					36.1012
		7410														4.372					36.0401
		7420														4.95883					35.884
		7430														4.62185					37.3195
		7440														4.25558					36.4444
		7450														4.95765					37.6092
		7460														5.2072					38.8908
		7470														4.28132					37.3282
		7480														5.75646					34.6266
		7490														3.1155					36.9155
		7500														4.39109					36.1609
		7510														3.97556					37.9254
		7520														4.98945					38.7935
		7530														5.7853					36.3421
		7540														4.1649					37.9368
		7550														5.92539					36.8636
		7560														4.25218					38.7268
		7570														5.03206					40.7167
		7580														3.07261					36.5248
		7590														4.75765					36.0607
		7600														3.09258					38.9118
		7610																			35.5037
		7620																			38.0224
		7630																			38.1914
		7640																			39.6174
		7650																			38.5775
		7660																			40.2658
		7670																			39.7528
		7680																			39.4826
		7690																			41.3907
		7700																			40.0826
		7710																			38.7058
		7720																			38.394
		7730																			37.2915
		7740																			35.3528
		7750																			38.228
		7760																			38.0468
		7770																			40.9127
		7780																			37.2525
		7790																			37.0901
		7800																			37.2496
		7810																			39.7387
		7820																			39.0692
		7830																			40.4546
		7840																			40.2495
		7850																			36.9592
		7860																			43.4
		7870																			39.9496
		7880																			41.9268
		7890																			40.9731
		7900																			41.2048
		7910																			39.1551
		7920																			39.054
		7930																			37.7727
		7940																			39.3481
		7950																			37.797
		7960																			39.193
		7970																			42.3014
		7980																			40.3188
		7990																			37.9329
		8000																			40.7754
		8010																			37.9195
		8020																			38.8292
		8030																			39.0239
		8040																			39.1238
		8050																			39.5738
		8060																			41.1722
		8070																			41.9704
		8080																			39.4915
		8090																			38.0371
		8100																			41.7224
		8110																			38.904
		8120																			40.7599
		8130																			38.4092
		8140																			41.9989
		8150																			40.435
		8160																			40.9717
		8170																			41.6657
		8180																			40.718
		8190																			40.622
		8200																			43.2484
		8210																			37.4861
		8220																			40.0748
		8230																			44.2004
		8240																			39.8148
		8250																			37.047
		8260																			39.8086
		8270																			39.9474
		8280																			39.2516
		8290																			42.2606
		8300																			39.4514
		8310																			41.9678
		8320																			40.7588
		8330																			41.5248
		8340																			39.2185
		8350																			39.4386
		8360																			38.6234
		8370																			39.8206
		8380																			39.4058
		8390																			40.7467
		8400																			41.0132
		8410																			40.657
		8420																			41.0896
		8430																			38.1481
		8440																			39.2111
		8450																			39.706
		8460																			39.5799
		8470																			39.4634
		8480																			38.9345
		8490																			38.7965
		8500																			40.6437
		8510																			39.35
		8520																			41.4472
		8530																			41.2431
		8540																			40.1373
		8550																			41.8387
		8560																			37.3995
		8570																			38.2613
		8580																			38.8961
		8590																			40.0384
		8600																			40.9266
		8610																			42.6681
		8620																			41.9026
		8630																			41.0289
		8640																			45.3146
		8650																			41.8981
		8660																			42.3595
		8670																			39.4637
		8680																			40.4088
		8690																			42.1562
		8700																			41.0194
		8710																			38.8815
		8720																			41.6759
		8730																			43.1787
		8740																			41.4238
		8750																			42.1136
		8760																			40.4382
		8770																			38.9009
		8780																			37.9077
		8790																			39.9315
		8800																			38.397
		8810																			38.4352
		8820																			37.3055
		8830																			38.3732
		8840																			39.3827
		8850																			38.9673
		8860																			41.3144
		8870																			37.9657
		8880																			38.7099
		8890																			39.1303
		8900																			40.0356
		8910																			39.2444
		8920																			37.1657
		8930																			40.9761
		8940																			38.8278
		8950																			44.629
		8960																			42.4107
		8970																			41.1414
		8980																			39.306
		8990																			41.3213
		9000																			38.9458
		9010																			43.0896
		9020																			39.4488
		9030																			39.0319
		9040																			37.5077
		9050																			40.1417
		9060																			40.2361
		9070																			40.2396
		9080																			37.6919
		9090																			41.7519
		9100																			39.0803
		9110																			39.8419
		9120																			39.168
		9130																			40.6526
		9140																			40.4132
		9150																			41.6602
		9160																			39.1496
		9170																			42.2458
		9180																			42.2415
		9190																			44.5514
		9200																			40.2572
		9210																			42.1285
		9220																			42.4211
		9230																			41.8239
		9240																			41.9928
		9250																			42.2412
		9260																			44.4597
		9270																			42.7722
		9280																			43.7007
		9290																			43.7254
		9300																			42.7192
		9310																			42.013
		9320																			41.6136
		9330																			40.2583
		9340																			43.8699
		9350																			44.1259
		9360																			45.1359
		9370																			39.7333
		9380																			38.8264
		9390																			41.7035
		9400																			43.085
		9410																			41.4331
		9420																			42.7933
		9430																			43.0977
		9440																			43.9937
		9450																			42.8405
		9460																			42.4711
		9470																			42.6407
		9480																			42.5442
		9490																			45.3389
		9500																			41.7625
		9510																			41.7658
		9520																			41.0273
		9530																			41.7676
		9540																			44.3386
		9550																			40.5692
		9560																			41.0171
		9570																			41.9884
		9580																			40.6292
		9590																			43.3202
		9600																			38.5835
		9610																			39.2324
		9620																			44.8092
		9630																			41.3794
		9640																			40.771
		9650																			41.3099
		9660																			41.3944
		9670																			39.3826
		9680																			40.3764
		9690																			40.1266
		9700																			37.1826
		9710																			40.6364
		9720																			40.087
		9730																			40.7148
		9740																			38.7463
		9750																			42.4894
		9760																			42.6016
		9770																			39.9634
		9780																			39.1058
		9790																			35.59
		9800																			39.0769
		9810																			40.5102
		9820																			42.0136
		9830																			40.5667
		9840																			36.1551
		9850																			38.0562
		9860																			41.2514
		9870																			40.9938
		9880																			41.7102
		9890																			35.6593
		9900																			41.1359
		9910																			38.8914
		9920																			40.3748
		9930																			41.9187
		9940																			38.5745
		9950																			41.8671
		9960																			37.0673
		9970																			37.4734
		9980																			42.4826
		9990																			39.9153
		10000																			40.7921
		10010																			37.6391
		10020																			40.7315
		10030																			37.9183
		10040																			38.7157
		10050																			39.0801
		10060																			40.6692
		10070																			39.0477
		10080																			41.6327
		10090																			40.4005
		10100																			39.8023
		10110																			42.2509
		10120																			42.1213
		10130																			40.8614
		10140																			41.0165
		10150																			41.69
		10160																			41.0085
		10170																			38.4931
		10180																			42.5158
		10190																			43.1859
		10200																			41.5176
		10210																			43.9539
		10220																			42.8702
		10230																			40.0313
		10240																			42.5935
		10250																			41.7188
		10260																			39.509
		10270																			40.8426
		10280																			43.1609
		10290																			45.2923
		10300																			42.1202
		10310																			40.6854
		10320																			40.5556
		10330																			44.2989
		10340																			41.9199
		10350																			42.0736
		10360																			39.7986
		10370																			45.7951
		10380																			44.1266
		10390																			43.9317
		10400																			38.8585
		10410																			45.0484
		10420																			41.6032
		10430																			40.0629
		10440																			40.6435
		10450																			43.5002
		10460																			42.765
		10470																			40.8507
		10480																			45.0558
		10490																			41.8239
		10500																			43.5158
		10510																			42.2856
		10520																			40.1393
		10530																			41.8581
		10540																			39.8857
		10550																			39.2752
		10560																			43.9259
		10570																			41.1849
		10580																			37.5947
		10590																			43.9683
		10600																			44.8896
		10610																			44.0326
		10620																			44.522
		10630																			43.7555
		10640																			44.244
		10650																			40.8685
		10660																			41.4669
		10670																			43.4664
		10680																			40.3607
		10690																			39.8822
		10700																			38.5532
		10710																			40.1572
		10720																			42.2324
		10730																			43.2569
		10740																			43.6958
		10750																			42.8738
		10760																			41.1424
		10770																			43.0775
		10780																			40.1928
		10790																			45.5796
		10800																			42.9621
		10810																			45.7331
		10820																			43.7109
		10830																			41.3257
		10840																			43.4424
		10850																			41.8463
		10860																			39.2856
		10870																			45.065
		10880																			41.4505
		10890																			40.862
		10900																			45.5808
		10910																			43.8243
		10920																			43.0373
		10930																			45.4296
		10940																			40.6924
		10950																			40.5658
		10960																			43.5313
		10970																			46.5254
		10980																			43.6287
		10990																			42.2273
		11000																			42.7565
		11010																			41.8477
		11020																			39.6512
		11030																			41.9158
		11040																			42.1727
		11050																			42.9565
		11060																			42.468
		11070																			41.2847
		11080																			41.2012
		11090																			42.3058
		11100																			41.7523
		11110																			40.7981
		11120																			41.6382
		11130																			41.904
		11140																			43.8556
		11150																			40.9232
		11160																			42.7363
		11170																			41.2798
		11180																			43.7701
		11190																			42.7896
		11200																			44.1546
		11210																			42.135
		11220																			42.9757
		11230																			42.4463
		11240																			40.071
		11250																			39.4366
		11260																			43.2447
		11270																			41.2278
		11280																			43.2088
		11290																			42.2245
		11300																			42.007
		11310																			40.0533
		11320																			41.9217
		11330																			44.0206
		11340																			39.9069
		11350																			45.6447
		11360																			41.6447
		11370																			40.6952
		11380																			40.8967
		11390																			44.0528
		11400																			42.4835
		11410																			40.5261
		11420																			39.1116
		11430																			37.8241
		11440																			41.3852
		11450																			42.1051
		11460																			41.0275
		11470																			41.4215
		11480																			40.0282
		11490																			44.9056
		11500																			39.9935
		11510																			45.1593
		11520																			43.5657
		11530																			41.5532
		11540																			44.1099
		11550																			42.9349
		11560																			39.872
		11570																			41.3106
		11580																			39.8937
		11590																			38.3685
		11600																			40.5479
		11610																			40.0746
		11620																			44.6222
		11630																			38.8981
		11640																			40.0546
		11650																			38.7032
		11660																			39.2475
		11670																			43.0507
		11680																			37.2386
		11690																			41.4982
		11700																			41.2326
		11710																			43.7373
		11720																			42.4458
		11730																			43.6868
		11740																			38.6549
		11750																			44.9755
		11760																			41.4882
		11770																			38.7424
		11780																			41.8886
		11790																			40.5452
		11800																			40.618
		11810																			41.8481
		11820																			40.0544
		11830																			40.7012
		11840																			39.478
		11850																			38.5505
		11860																			42.1104
		11870																			34.743
		11880																			39.0025
		11890																			43.834
		11900																			39.6349
		11910																			42.4954
		11920																			42.3444
		11930																			43.3093
		11940																			41.5495
		11950																			44.929
		11960																			43.8093
		11970																			40.8474
		11980																			41.793
		11990																			39.5722
		12000																			39.9849
		12010																			39.0658
		12020																			40.7359
		12030																			41.6553
		12040																			41.9636
		12050																			42.2831
		12060																			41.9775
		12070																			39.2558
		12080																			40.6646
		12090																			41.818
		12100																			42.1829
		12110																			41.1349
		12120																			45.5921
		12130																			40.4046
		12140																			42.3229
		12150																			41.8053
		12160																			44.6706
		12170																			43.388
		12180																			42.8535
		12190																			46.3215
		12200																			43.6479
		12210																			41.5755
		12220																			47.9852
		12230																			43.7329
		12240																			44.3968
		12250																			42.371
		12260																			43.2389
		12270																			43.8345
		12280																			44.6183
		12290																			45.0273
		12300																			45.7764
		12310																			41.0563
		12320																			44.413
		12330																			45.0408
		12340																			44.1042
		12350																			43.5437
		12360																			44.5391
		12370																			40.2782
		12380																			45.3542
		12390																			46.8648
		12400																			40.9317
		12410																			44.0833
		12420																			44.0708
		12430																			43.7414
		12440																			46.2148
		12450																			44.6533
		12460																			42.7697
		12470																			41.7475
		12480																			42.847
		12490																			43.5269
		12500																			42.0129
		12510																			44.4136
		12520																			41.4139
		12530																			41.663
		12540																			45.4143
		12550																			46.162
		12560																			46.8121
		12570																			42.3273
		12580																			43.2477
		12590																			44.7576
		12600																			42.1393
		12610																			45.3028
		12620																			47.0981
		12630																			44.069
		12640																			44.054
		12650																			45.4928
		12660																			45.6984
		12670																			41.9981
		12680																			44.0153
		12690																			48.1294
		12700																			41.09
		12710																			41.4299
		12720																			42.2923
		12730																			43.8412
		12740																			46.0708
		12750																			40.5371
		12760																			48.0155
		12770																			44.3055
		12780																			41.2231
		12790																			47.6833
		12800																			41.2681
		12810																			45.2322
		12820																			44.1477
		12830																			46.2961
		12840																			45.6827
		12850																			47.0345
		12860																			42.3576
		12870																			42.743
		12880																			46.8861
		12890																			44.6629
		12900																			42.7879
		12910																			45.7033
		12920																			44.0694
		12930																			45.2912
		12940																			42.6303
		12950																			39.9613
		12960																			44.9025
		12970																			46.1215
		12980																			43.2806
		12990																			46.8572
		13000																			43.6579
		13010																			40.0857
		13020																			41.8023
		13030																			43.6683
		13040																			44.2768
		13050																			46.4644
		13060																			42.9574
		13070																			41.4146
		13080																			42.4701
		13090																			43.7586
		13100																			46.5121
		13110																			46.6014
		13120																			45.1632
		13130																			41.4849
		13140																			42.6379
		13150																			41.3616
		13160																			44.1697
		13170																			42.9736
		13180																			43.3317
		13190																			41.7519
		13200																			46.1549
		13210																			41.9227
		13220																			43.2063
		13230																			44.5535
		13240																			44.9563
		13250																			38.3972
		13260																			41.2393
		13270																			44.8322
		13280																			45.2118
		13290																			40.6602
		13300																			45.8394
		13310																			44.2458
		13320																			45.0963
		13330																			46.7106
		13340																			40.0116
		13350																			46.2607
		13360																			45.9898
		13370																			45.0188
		13380																			43.0826
		13390																			49.516
		13400																			43.9988
		13410																			45.8495
		13420																			46.7176
		13430																			43.341
		13440																			45.0715
		13450																			42.6926
		13460																			45.412
		13470																			44.1996
		13480																			47.6674
		13490																			40.7095
		13500																			44.1113
		13510																			42.6278
		13520																			44.1123
		13530																			46.0523
		13540																			45.6887
		13550																			42.8579
		13560																			41.9496
		13570																			43.5393
		13580																			41.5701
		13590																			45.1092
		13600																			42.4924
		13610																			44.4803
		13620																			44.3921
		13630																			45.2627
		13640																			47.1648
		13650																			47.4199
		13660																			44.0961
		13670																			43.5972
		13680																			44.4665
		13690																			46.8306
		13700																			45.74
		13710																			42.4158
		13720																			44.6928
		13730																			46.3428
		13740																			39.2544
		13750																			42.1136
		13760																			46.6136
		13770																			47.1776
		13780																			46.6812
		13790																			47.1769
		13800																			47.3018
		13810																			44.3454
		13820																			44.3826
		13830																			42.7215
		13840																			41.4651
		13850																			41.4298
		13860																			45.3083
		13870																			42.8504
		13880																			42.9294
		13890																			43.1907
		13900																			42.7324
		13910																			44.1505
		13920																			43.8454
		13930																			44.2386
		13940																			45.6993
		13950																			43.1533
		13960																			45.479
		13970																			45.0187
		13980																			46.0739
		13990																			40.1262
		14000																			42.5803
		14010																			40.0401
		14020																			42.7456
		14030																			41.9151
		14040																			41.0681
		14050																			45.1532
		14060																			47.0357
		14070																			45.8556
		14080																			44.5033
		14090																			43.0428
		14100																			42.0431
		14110																			43.2423
		14120																			46.7458
		14130																			42.6241
		14140																			42.2252
		14150																			46.0502
		14160																			44.7923
		14170																			44.9817
		14180																			46.4826
		14190																			43.971
		14200																			42.8338
		14210																			44.2123
		14220																			43.8562
		14230																			46.9759
		14240																			45.4033
		14250																			42.9868
		14260																			46.7697
		14270																			46.103
		14280																			42.6593
		14290																			46.2319
		14300																			41.9539
		14310																			40.9845
		14320																			41.1829
		14330																			45.7553
		14340																			47.1359
		14350																			44.9891
		14360																			46.2067
		14370																			43.5729
		14380																			42.5493
		14390																			42.2637
		14400																			44.6701
		14410																			42.3009
		14420																			41.5653
		14430																			48.6121
		14440																			46.3944
		14450																			41.6986
		14460																			40.3891
		14470																			42.1896
		14480																			46.4222
		14490																			49.1028
		14500																			46.1773
		14510																			43.8974
		14520																			47.4296
		14530																			42.5766
		14540																			46.3167
		14550																			43.8474
		14560																			41.4553
		14570																			45.1136
		14580																			45.7445
		14590																			42.7544
		14600																			43.8137
		14610																			46.8345
		14620																			40.8599
		14630																			48.4681
		14640																			45.7014
		14650																			42.4931
		14660																			47.0421
		14670																			45.5667
		14680																			45.9109
		14690																			49.2079
		14700																			47.9468
		14710																			47.8658
		14720																			49.8988
		14730																			49.6393
		14740																			47.8755
		14750																			48.9097
		14760																			50.7264
		14770																			48.0861
		14780																			41.3525
		14790																			43.9563
		14800																			47.8754
		14810																			44.318
		14820																			46.2651
		14830																			45.9585
		14840																			44.6255
		14850																			45.2056
		14860																			45.7354
		14870																			46.6852
		14880																			44.2048
		14890																			42.8231
		14900																			48.4035
		14910																			46.4544
		14920																			44.0185
		14930																			47.8065
		14940																			48.7257
		14950																			46.8886
		14960																			46.1129
		14970																			46.5604
		14980																			47.0935
		14990																			46.0185
		15000																			45.2055
		15010																			47.8981
		15020																			46.7616
		15030																			45.8975
		15040																			46.2208
		15050																			45.1982
		15060																			42.3335
		15070																			47.1401
		15080																			47.3199
		15090																			45.2521
		15100																			45.4616
		15110																			47.5731
		15120																			46.4294
		15130																			47.1005
		15140																			48.0204
		15150																			49.4907
		15160																			42.0005
		15170																			44.9275
		15180																			43.99
		15190																			43.3215
		15200																			43.4606
		15210																			45.8011
		15220																			47.5729
		15230																			44.8069
		15240																			45.3431
		15250																			44.36
		15260																			44.5879
		15270																			43.5377
		15280																			48.0377
		15290																			45.9104
		15300																			48.2669
		15310																			47.1505
		15320																			44.4787
		15330																			42.1032
		15340																			44.9665
		15350																			43.7835
		15360																			43.0537
		15370																			45.2914
		15380																			45.0451
		15390																			43.7305
		15400																			49.2433
		15410																			47.2257
		15420																			48.246
		15430																			44.2595
		15440																			41.7479
		15450																			39.7743
		15460																			43.9641
		15470																			43.36
		15480																			42.4049
		15490																			43.9315
		15500																			39.3065
		15510																			42.69
		15520																			41.3021
		15530																			40.4398
		15540																			42.354
		15550																			43.7504
		15560																			42.178
		15570																			41.9775
		15580																			41.7912
		15590																			42.9366
		15600																			43.3986
		15610																			42.8183
		15620																			48.0158
		15630																			44.5636
		15640																			45.5285
		15650																			44.1243
		15660																			45.2602
		15670																			47.2083
		15680																			44.3641
		15690																			45.0384
		15700																			43.0261
		15710																			44.3644
		15720																			44.8815
		15730																			48.2768
		15740																			43.5812
		15750																			44.9754
		15760																			44.319
		15770																			45.6849
		15780																			44.8058
		15790																			42.1467
		15800																			48.2421
		15810																			44.7104
		15820																			42.6217
		15830																			46.2518
		15840																			42.4347
		15850																			44.6616
		15860																			44.4113
		15870																			44.2817
		15880																			47.9268
		15890																			43.9236
		15900																			41.3549
		15910																			42.2389
		15920																			46.9952
		15930																			47.3109
		15940																			43.9456
		15950																			43.2016
		15960																			40.9746
		15970																			43.7667
		15980																			44.24
		15990																			42.5775
		16000																			44.3813
		16010																			43.5387
		16020																			40.4199
		16030																			43.341
		16040																			44.0088
		16050																			46.5609
		16060																			45.1475
		16070																			41.8903
		16080																			38.1701
		16090																			42.3085
		16100																			45.5278
		16110																			41.4532
		16120																			43.4871
		16130																			39.8181
		16140																			42.1908
		16150																			45.934
		16160																			44.4738
		16170																			46.1965
		16180																			40.8731
		16190																			43.1227
		16200																			46.2921
		16210																			42.2616
		16220																			43.7887
		16230																			44.6954
		16240																			45.4329
		16250																			40.871
		16260																			42.8544
		16270																			44.9132
		16280																			45.8609
		16290																			47.3732
		16300																			42.8336
		16310																			45.7245
		16320																			44.7817
		16330																			41.5389
		16340																			44.4521
		16350																			44.0227
		16360																			40.7699
		16370																			43.3049
		16380																			45.6833
		16390																			42.3254
		16400																			46.4493
		16410																			45.1748
		16420																			44.7109
		16430																			42.0627
		16440																			46.6658
		16450																			48.5058
		16460																			43.3972
		16470																			44.6662
		16480																			43.7491
		16490																			46.4845
		16500																			47.7886
		16510																			43.5347
		16520																			42.4687
		16530																			42.9759
		16540																			42.9016
		16550																			43.7759
		16560																			44.29
		16570																			44.5099
		16580																			45.9336
		16590																			42.9431
		16600																			45.6014
		16610																			42.2614
		16620																			45.2669
		16630																			43.6261
		16640																			45.6062
		16650																			46.5785
		16660																			42.6264
		16670																			43.0452
		16680																			42.4458
		16690																			41.5982
		16700																			41.1741
		16710																			43.5477
		16720																			43.6533
		16730																			43.7357
		16740																			40.829
		16750																			41.9206
		16760																			40.4734
		16770																			41.162
		16780																			44.7146
		16790																			45.6952
		16800																			42.3556
		16810																			45.4475
		16820																			44.8407
		16830																			41.046
		16840																			42.0192
		16850																			42.1949
		16860																			41.022
		16870																			44.487
		16880																			43.6787
		16890																			41.8729
		16900																			41.8197
		16910																			40.4938
		16920																			44.0504
		16930																			44.3292
		16940																			42.1532
		16950																			42.4011
		16960																			42.5977
		16970																			43.2019
		16980																			44.6252
		16990																			43.5704
		17000																			45.3843
		17010																			47.2208
		17020																			43.085
		17030																			44.3072
		17040																			47
		17050																			42.3456
		17060																			43.9741
		17070																			40.1915
		17080																			43.8539
		17090																			41.5067
		17100																			41.4285
		17110																			44.3011
		17120																			46.4415
		17130																			43.2278
		17140																			45.2923
		17150																			45.5007
		17160																			46.3398
		17170																			42.7062
		17180																			44.1461
		17190																			44.0519
		17200																			43.6157
		17210																			44.6581
		17220																			43.3296
		17230																			44.3449
		17240																			43.631
		17250																			43.5141
		17260																			45.5421
		17270																			44.3215
		17280																			45.834
		17290																			44.6157
		17300																			47.6352
		17310																			40.5977
		17320																			44.2363
		17330																			45.4768
		17340																			48.5146
		17350																			42.9394
		17360																			41.4748
		17370																			41.2664
		17380																			44.0238
		17390																			45.5246
		17400																			44.0819
		17410																			44.8104
		17420																			43.9875
		17430																			43.4901
		17440																			43.7308
		17450																			44.2431
		17460																			43.9192
		17470																			44.041
		17480																			43.0894
		17490																			42.5465
		17500																			46.4292
		17510																			45.3727
		17520																			42.5533
		17530																			43.6241
		17540																			43.8178
		17550																			39.6194
		17560																			42.0331
		17570																			47.1792
		17580																			44.3783
		17590																			45.3467
		17600																			38.3896
		17610																			42.4461
		17620																			44.9158
		17630																			46.9572
		17640																			46.1127
		17650																			45.3548
		17660																			47.543
		17670																			43.9736
		17680																			43.088
		17690																			44.2002
		17700																			46.3373
		17710																			44.521
		17720																			44.0975
		17730																			40.9366
		17740																			44.1535
		17750																			42.509
		17760																			39.7544
		17770																			40.9322
		17780																			41.5007
		17790																			42.8
		17800																			43.3194
		17810																			44.0576
		17820																			43.8139
		17830																			43.444
		17840																			45.3762
		17850																			45.0069
		17860																			40.7542
		17870																			45.5718
		17880																			43.5125
		17890																			43.9808
		17900																			41.9815
		17910																			39.9783
		17920																			42.9164
		17930																			42.7336
		17940																			43.6261
		17950																			42.8621
		17960																			43.1176
		17970																			44.3995
		17980																			41.5025
		17990																			39.7092
		18000																			44.7363
		18010																			43.2352
		18020																			47.9572
		18030																			44.8982
		18040																			42.8623
		18050																			40.8211
		18060																			43.816
		18070																			42.2581
		18080																			40.6187
		18090																			46.419
		18100																			40.8012
		18110																			44.1907
		18120																			39.7097
		18130																			41.4579
		18140																			41.3072
		18150																			42.4896
		18160																			45.3491
		18170																			41.0292
		18180																			42.684
		18190																			42.0467
		18200																			42.3991
		18210																			43.6195
		18220																			41.5915
		18230																			41.7081
		18240																			44.0708
		18250																			46.1262
		18260																			37.8174
		18270																			45.2569
		18280																			41.7903
		18290																			42.5458
		18300																			44.0134
		18310																			42.3697
		18320																			45.2923
		18330																			42.7664
		18340																			48.3134
		18350																			44.0745
		18360																			41.7502
		18370																			45.431
		18380																			42.81
		18390																			41.1504
		18400																			44.3023
		18410																			42.0086
		18420																			42.859
		18430																			42.4246
		18440																			44.8211
		18450																			39.0593
		18460																			39.1669
		18470																			43.2227
		18480																			44.0842
		18490																			42.7165
		18500																			39.9871
		18510																			41.8352
		18520																			43.0444
		18530																			44.7519
		18540																			43.9488
		18550																			42.665
		18560																			45.0926
		18570																			39.1914
		18580																			47.2621
		18590																			40.9657
		18600																			41.5912
		18610																			42.4824
		18620																			44.0489
		18630																			43.0711
		18640																			38.7343
		18650																			41.6085
		18660																			41.8891
		18670																			41.5493
		18680																			44.1465
		18690																			43.1741
		18700																			41.3106
		18710																			45.4755
		18720																			43.0127
		18730																			40.5847
		18740																			44.4174
		18750																			43.485
		18760																			41.728
		18770																			45.2956
		18780																			38.7754
		18790																			43.2099
		18800																			41.8268
		18810																			42.3414
		18820																			39.9914
		18830																			43.5984
		18840																			44.35
		18850																			41.3254
		18860																			43.0197
		18870																			45.2843
		18880																			39.9025
		18890																			39.3873
		18900																			42.7847
		18910																			42.6813
		18920																			42.4803
		18930																			45.0026
		18940																			43.069
		18950																			43.5028
		18960																			43.6005
		18970																			41.7606
		18980																			43.6329
		18990																			44.419
		19000																			42.3563
		19010																			42.7609
		19020																			36.1833
		19030																			42.4502
		19040																			45.1114
		19050																			40.4859
		19060																			43.1766
		19070																			42.5343
		19080																			43.8701
		19090																			42.1968
		19100																			44.2623
		19110																			40.4676
		19120																			43.375
		19130																			46.1354
		19140																			45.2269
		19150																			39.5514
		19160																			43.915
		19170																			39.2806
		19180																			41.8113
		19190																			43.3474
		19200																			46.3894
		19210																			40.0327
		19220																			44.6437
		19230																			41.8979
		19240																			42.4722
		19250																			43.596
		19260																			42.6766
		19270																			44.4069
		19280																			45.4776
		19290																			46.4952
		19300																			42.5958
		19310																			47.6035
		19320																			46.8349
		19330																			44.9085
		19340																			42.5475
		19350																			41.1789
		19360																			41.8988
		19370																			41.1259
		19380																			45.2606
		19390																			41.7766
		19400																			43.4636
		19410																			49.2894
		19420																			45.4153
		19430																			48.7141
		19440																			46.1079
		19450																			41.9139
		19460																			47.0614
		19470																			42.5239
		19480																			44.8347
		19490																			44.5579
		19500																			46.8185
		19510																			46.7158
		19520																			48.1632
		19530																			46.9093
		19540																			48.1893
		19550																			44.3996
		19560																			42.4838
		19570																			43.7415
		19580																			48.3986
		19590																			48.0866
		19600																			44.7685
		19610																			45.2783
		19620																			43.9306
		19630																			42.9106
		19640																			42.2011
		19650																			43.9178
		19660																			47.6268
		19670																			42.3829
		19680																			42.4002
		19690																			44.0241
		19700																			45.3518
		19710																			46.5246
		19720																			41.3944
		19730																			43.3618
		19740																			42.0403
		19750																			44.7748
		19760																			41.0408
		19770																			43.3683
		19780																			46.1315
		19790																			40.5278
		19800																			43.6776
		19810																			44.9676
		19820																			46.1576
		19830																			41.6599
		19840																			47.0514
		19850																			41.0967
		19860																			43.4315
		19870																			47.0109
		19880																			48.3366
		19890																			43.0445
		19900																			41.543
		19910																			41.3938
		19920																			43.025
		19930																			42.2264
[truncated: 11 more rows]
[truncated: 262 more columns]
