# Supplementary material for: Targeting an anchored phosphatase-deacetylase unit restores renal ciliary homeostasis
Source: eLife. 2021 Jul 12;10:e67828. doi: 10.7554/eLife.67828 (PMC8291974; doi:10.7554/eLife.67828)
Supplement: Figure 6—source data 4. [file elife-67828-fig6-data4.xlsx]

## Sheet: Sheet1
		Figure 6T-Percent recovery of Arl13b GFP at 3 seconds after photobleaching
		Wildtype	AKAP220-/-	AKAP220ΔPP1
		21.589	16.346	34.5
		49.752	34.711	27.127
		16.151	15.018	34.236
		30.991	29.258	27.407
		18.754	43.183	57.686
		1.653	35.868	31.647
		51.235	36.354	72.207
		17.638	43.638	44.048
		1.568	44.637	48.709
		3.753	66.708	36.301
		22.599	50.006	59.746
		4.806	16.219	41.048
		8.767	44.255	31.859
		9.886	33.673	28.515
		28.979	61.302	47.239
		87.862	42.98	61.274
		29.495	49.44	28.358
		10.712	83.155	26.552
		1.175	34.359	39.603
		13.032	9.093	20.506
		8.785	39.072	56.783
		22.82	10.897	14.984
		19.589	6.483	44.42
		17.001	66.792	44.449
		52.812	93.059	59.484
		14.316	12.599	49.336
		15.539	57.831	79.008
		30.889	35.538	38.214
		23.26	45.316	27.225
		12.011	14.544	29.112
		26.048	34.551	8.432
		15.406	89.306	15.977
		21.349	26.577	28.703
		28.51	38.25	83.581
		16.133	81.143	36.372
		22.748	59.192	58.446
		5.397	32.806	45.28
		57.404	33.944	11.124
		13.905	55.591	34.63
		21.871	34.7	24.106
		6.685	21.562	13.036
		7.105	45.379	19.903
		52.688	52.397	42.703
		21.961	73.656	67.346
		19.69	74.774	69.437
		14.118	41.715	55.062
		32.103	58.216	48.756
		24.107	43.951	32.011
		12.221	55.252	41.621
		29.623	34.86	48.637
		16.595	30.545	41.62
		20.2	34.866	79.189
		32.029	28.045	46.912
		15.588	17.226	39.03
		24.024	23.829	36.061
		5.58	94.415	67.971
		16.409	86.958	30.093
		22.365	48.909	10.854
		7.055	52.317	73.986
		12.899	18.471	22.958
			39.085	68.67
			67.026	48.71
			41.096	35.435
			26.736	24.758
			26.711	69.337
			21.546	36.627
			37.367	38.835
			82.22	5.404
			59.265	59.634
			33.039	19.851
			33.802	29.221
			56.784	31.101
			35.574	4.817
			21.512	36.007
			46.082	8.438
			71.688	34.294
			74.463	25.48
			40.312	33.344
			58.692	42.501
			44.135	19.51
			49.344	52.142
			34.302	7.41
			30.21	34.6
			33.516	88.872
			27.583	8.833
			23.202	59.424
			23.988	67.323
			94.983	50.028
			86.639	61.475
			47.787	82.404
			54.403	34.426
			16.851	37.946
			40.251	70.48
			66.729	33.638
			40.286	8.749
			23.653	31.395
			24.418	42.223
			45.223	35.95
			38.485	38.125
			44.186	7.952
			51.083	33.728
			41.784	24.67
			50.405	39.048
			33.343	42.363
			53.264	17.501
			38.804	54.267
			45.217	33.73
			31.726	19.994
			39.884	85.969
			43.164	8.35
			29.405	56.836
			50.873	66.415
			46.37	50.79
			51.911	60.177
			36.693	81.518
				35.958
				40.745
				72.121
				8.071
				31.555
				42.453
				36.185
				22.239
				18.763
