# Supplementary material for: Targeting an anchored phosphatase-deacetylase unit restores renal ciliary homeostasis
Source: eLife. 2021 Jul 12;10:e67828. doi: 10.7554/eLife.67828 (PMC8291974; doi:10.7554/eLife.67828)
Supplement: Figure 6—source data 5. [file elife-67828-fig6-data5.xlsx]

## Sheet: Sheet1
		Figure 6U- Half life recovery of Arl13b-GFP after photobleaching
		WT	AKAP220KO	AKAP220-ΔPP1
		205	13.89	671.11
		1358	197.22	822.22
		136.11	77.78	416.67
		233.33	413.89	753.33
		144.44	316.67	2460
		10	691.67	997.22
		10	205.56	106.67
		369.44	741.67	219.44
		30	441.67	163.33
		30.56	1013	123.33
		27.78	223.33	823.33
		250	355.56	630.56
		10	327.78	133.33
		52.78	1073	471.11
		13.58	391.67	363.89
		136.11	294.44	230.56
		152.78	726.67	170
		416	208.33	653.33
		36.11	127.78	797.22
		10	263.89	555.56
		55.56	563.33	486.11
		20	57.78	613.89
		36.11	61.18	550
		111.11	388.89	277.78
		20	313.89	427.78
		36.11	611.11	71.11
		1547.22	102.78	1447.22
		333.33	944.44	1046.67
		50	344.44	572.22
		111.11	822.22	283.33
		44.44	93.33	137.78
		258.33	494.44	208.33
		186.11	163.89	144.44
		30.56	250	727.78
		652.78	172.22	161.11
		86.11	177.78	33.33
		69.44	405.56	36.11
		53.33	97.22	63.89
		32.89	570	246.67
		108.33	19.44	490
		44.48	438.89	144.44
		313.33	136.11	450
		36.11	533.33	296.67
		36.11	169.44	440
		1525	430.56	116.67
		33.33	366.67	133.33
		105.6	477.78	641.67
		130.5	297.22	86.11
		111.11	516.67	202.78
		36.11	35.56	491.67
		252.78	197.22	144.44
		244.44	600	430
		36.11	213	400
		311.11	168.89	219.44
		52.78	22.22	144.44
		83.33	61.11	455.56
		43.33	741.67	236.11
		44.44	243.33	322.22
		36.11	313.89	363.89
		73.33	652.78	1630
		30	144.44	213.89
		36.11	186.11	108.33
			253.33	172.22
			216.67	27.78
			500	377.78
			75.56	433.33
			216.67	219.44
			144.44	52.78
			244.44	200
			191.67	177.78
			197.22	22.22
			491.67	50
			97.22	57.78
			606.67	75.56
			33.33	33.33
			294.44	600
			130.56	166.67
			152.78	106.67
			433.33	350
			396.67	113.89
			502.78	352.78
			369.44	119.44
			408.33	397.22
			36	91.67
			194.44	136.67
			580.56	480.56
			391.67	86.11
			144.44	480.56
			30.56	397.22
			44.44	288.89
			863.89	422.22
			285	300
			302.78	413.33
			808.33	69.44
			175	502.78
			194.44	341.76
			256.67	352.78
			247.22	844.44
			486.11	183.33
			66.67	636.11
			300	643.33
			600	161.11
			283.33	88.89
			269.44	213.33
			550	144.44
			522.22	347.22
			263.89	113.89
			550	380.56
			363.89	186.67
			461.11	311.11
			502.78	444.44
			556.56	80.56
			247.22	402.78
			650	358.33
			125	258.33
			316.67	411.11
			783.33	300
			586.11	404.44
			233.33	75
			433.33	480.56
				58.33
				889.8
				136.11
				444.44
				525
				305.56
