# Supplementary material for: Targeting an anchored phosphatase-deacetylase unit restores renal ciliary homeostasis
Source: eLife. 2021 Jul 12;10:e67828. doi: 10.7554/eLife.67828 (PMC8291974; doi:10.7554/eLife.67828)
Supplement: Figure 7—source data 1. [file elife-67828-fig7-data1.xlsx]

## Sheet: Sheet1
		Figure 7I- Cyst index %
		DMSO	0.2μM	1μM
		98.3504	55.345	60.7638
		101.65	49.8286	58.5076
		105	70	45
		90	48.4615	66.3158
		105	35	52.5
